# Supplementary material for: A CRISPR Activation Screen Identifies an Atypical Rho GTPase That Enhances Zika Viral Entry
Source: Viruses. 2021 Oct 20;13(11):2113. doi: 10.3390/v13112113 (PMC8623001; doi:10.3390/v13112113)
Supplement: Supplementary file 1 [file viruses-13-02113-s001.zip › Table S1. ZIKV SAM screen results.xlsx]

## Sheet: screen results
id	num	neg|score	neg|p-value	neg|fdr	neg|rank	neg|goodsgrna	pos|score	pos|p-value	pos|fdr	pos|rank	pos|goodsgrna
NM_001168280	3	1.4274e-06	3.9641e-06	0.05198	1	3	0.99993	0.99991	0.999967	23726	0
NM_133639	3	1.5384e-06	4.3813e-06	0.05198	2	3	1	1	0.999998	23728	0
NM_003410	3	2.1338e-05	5.654e-05	0.447195	3	2	0.79441	0.79437	0.999731	18726	0
NM_004925	3	4.078e-05	0.00010912	0.60451	4	2	0.87722	0.87715	0.999731	20678	0
NM_003794	3	4.7978e-05	0.00013165	0.60451	5	2	0.23986	0.34939	0.995378	8293	1
NM_020854	3	6.4013e-05	0.00017922	0.60451	6	1	0.2426	0.35099	0.995378	8340	1
NM_021145	3	6.5835e-05	0.00018798	0.60451	7	3	0.99993	0.99993	0.999967	23727	0
NM_001032372	3	7.3488e-05	0.00021176	0.60451	8	2	0.61003	0.61334	0.999731	14475	1
NM_001172745	3	8.0378e-05	0.00022929	0.60451	9	2	0.31707	0.39614	0.995378	9421	1
NM_000940	3	0.00010042	0.0002948	0.667555	10	3	0.9993	0.99928	0.999967	23706	0
NM_015987	3	0.00011022	0.0003286	0.667555	11	3	0.99989	0.99987	0.999967	23725	0
NM_001172688	3	0.00011519	0.00034613	0.667555	12	2	0.91544	0.9155	0.999731	21657	0
NM_032444	3	0.00012231	0.00036574	0.667555	13	3	0.99988	0.99986	0.999967	23724	0
NM_018156	3	0.00014936	0.00043959	0.721991	14	2	0.83948	0.83954	0.999731	19762	0
NM_001146686	3	0.00015802	0.00046254	0.721991	15	3	0.99984	0.99982	0.999967	23723	0
NM_001198802	3	0.00017775	0.00052597	0.721991	16	2	0.55474	0.56546	0.999731	13357	1
NM_005301	3	0.00019203	0.00056603	0.721991	17	2	0.35452	0.41997	0.996661	9991	1
NM_005175	3	0.00019688	0.00057688	0.721991	18	3	0.9998	0.99978	0.999967	23722	0
NM_015409	3	0.00019789	0.00057813	0.721991	19	3	0.9998	0.99978	0.999967	23721	0
NM_152283	3	0.0002347	0.00068245	0.773456	20	3	0.97957	0.97971	0.999731	23231	0
NM_001092	3	0.0002354	0.00068453	0.773456	21	3	0.99976	0.99974	0.999967	23720	0
NM_001048241	3	0.00027214	0.00077967	0.785941	22	3	0.99973	0.99969	0.999967	23719	0
NM_001204744	3	0.00027737	0.00079344	0.785941	23	1	0.80926	0.80922	0.999731	19054	0
NM_005763	3	0.00028756	0.0008214	0.785941	24	3	0.99057	0.99062	0.999731	23496	0
NM_003685	3	0.00029005	0.00082807	0.785941	25	2	0.38164	0.43773	0.99875	10399	1
NM_012382	3	0.00032004	0.00090485	0.796755	26	1	0.73175	0.73183	0.999731	17248	0
NM_016086	3	0.00032612	0.00092571	0.796755	27	2	0.87663	0.87659	0.999731	20664	0
NM_001204505	3	0.00034106	0.00097078	0.796755	28	3	0.99966	0.99962	0.999967	23718	0
NM_170675	3	0.0003627	0.0010367	0.796755	29	2	0.59635	0.60108	0.999731	14186	1
NM_001033873	3	0.00037179	0.0010613	0.796755	30	3	0.99941	0.99938	0.999967	23712	0
NM_001278260	3	0.00040454	0.0011498	0.796755	31	2	0.42939	0.4704	0.999731	11150	1
NM_003969	3	0.00040537	0.0011515	0.796755	32	1	0.50054	0.52255	0.999731	12380	1
NM_001122636	3	0.0004098	0.0011681	0.796755	33	3	0.99959	0.99955	0.999967	23717	0
NM_001278308	3	0.0004365	0.0012428	0.796755	34	3	0.99956	0.99953	0.999967	23716	0
NM_005087	3	0.00044217	0.0012541	0.796755	35	3	0.99956	0.99952	0.999967	23715	0
NM_003881	3	0.00044803	0.0012654	0.796755	36	2	0.19342	0.29853	0.995378	7056	1
NM_033544	3	0.0004827	0.0013693	0.796755	37	2	0.82525	0.82534	0.999731	19430	0
NM_001134670	3	0.00049069	0.0013897	0.796755	38	1	0.0021938	0.0060611	0.857999	165	2
NM_001004684	3	0.00051302	0.0014431	0.796755	39	3	0.99949	0.99946	0.999967	23714	0
NM_002629	3	0.00052099	0.0014677	0.796755	40	2	0.40328	0.4523	0.999731	10725	1
NM_001278633	3	0.00053336	0.0014949	0.796755	41	1	0.040848	0.089604	0.977105	2154	2
NM_001134938	3	0.00056384	0.0015846	0.796755	42	3	0.99944	0.99941	0.999967	23713	0
NM_001172677	3	0.00056886	0.0016004	0.796755	43	2	0.072576	0.13491	0.981297	3260	1
NM_021114	3	0.00057602	0.001615	0.796755	44	2	0.44926	0.48442	0.999731	11483	1
NM_002564	3	0.00059714	0.0016714	0.796755	45	3	0.99532	0.99533	0.999731	23621	0
NM_001190730	3	0.00060256	0.0016872	0.796755	46	3	0.9994	0.99937	0.999967	23711	0
NM_020216	3	0.00061051	0.001706	0.796755	47	3	0.99939	0.99936	0.999967	23710	0
NM_001253380	3	0.00061868	0.0017306	0.796755	48	2	0.33498	0.40742	0.995378	9710	1
NM_001291656	3	0.00062163	0.0017356	0.796755	49	3	0.99938	0.99935	0.999967	23709	0
NM_013286	3	0.00062226	0.0017371	0.796755	50	3	0.99938	0.99935	0.999967	23708	0
NM_002929	3	0.00062367	0.0017423	0.796755	51	2	0.0064515	0.017365	0.890009	462	1
NM_012290	3	0.0006392	0.0017895	0.796755	52	3	0.99936	0.99933	0.999967	23707	0
NM_001010904	3	0.00064456	0.001807	0.796755	53	2	0.14169	0.22992	0.995378	5446	1
NM_181532	3	0.00064704	0.0018132	0.796755	54	2	0.066882	0.12688	0.977105	3077	1
NM_182521	3	0.00070399	0.0019718	0.829379	55	2	0.071845	0.13385	0.981184	3237	1
NM_182503	3	0.00071963	0.0020169	0.829379	56	3	0.99928	0.99926	0.999967	23705	0
NM_018166	3	0.00072362	0.0020269	0.829379	57	2	0.27313	0.36915	0.995378	8773	1
NM_018083	3	0.00072375	0.0020273	0.829379	58	3	0.99928	0.99925	0.999967	23704	0
NM_006353	3	0.00074665	0.0020907	0.83619	59	2	0.6421	0.64292	0.999731	15152	1
NM_007078	3	0.00077839	0.0021838	0.83619	60	2	0.24246	0.3509	0.995378	8338	1
NM_001098630	3	0.00078248	0.0021959	0.83619	61	3	0.95946	0.95965	0.999731	22714	0
NM_012152	3	0.0007893	0.0022172	0.83619	62	2	0.23381	0.34593	0.995378	8208	1
NM_000723	3	0.00080616	0.002271	0.83619	63	3	0.99919	0.99917	0.999967	23703	0
NM_198571	3	0.00082441	0.0023161	0.83619	64	3	0.99918	0.99914	0.999967	23702	0
NM_170776	3	0.00083195	0.0023373	0.83619	65	3	0.93171	0.9317	0.999731	22043	0
NM_016729	3	0.00083647	0.0023503	0.83619	66	3	0.99916	0.99913	0.999967	23701	0
NM_133375	3	0.00084103	0.0023611	0.83619	67	3	0.99916	0.99912	0.999967	23700	0
NM_203462	3	0.0008746	0.0024533	0.836884	68	1	0.56584	0.57472	0.999731	13568	1
NM_006282	3	0.0008924	0.0025097	0.836884	69	2	0.8985	0.8984	0.999731	21217	0
NM_016491	3	0.00091141	0.0025577	0.836884	70	2	0.031145	0.075342	0.977105	1809	1
NM_001280799	3	0.00091288	0.0025606	0.836884	71	2	0.88244	0.88227	0.999731	20814	0
NM_207013	3	0.00091576	0.0025706	0.836884	72	3	0.99908	0.99905	0.999967	23699	0
NM_001280788	3	0.00091726	0.0025752	0.836884	73	2	0.81368	0.81363	0.999731	19160	0
NM_080386	3	0.00093956	0.0026332	0.836884	74	2	0.88932	0.88918	0.999731	20973	0
NM_014320	3	0.00094958	0.0026611	0.836884	75	3	0.99905	0.99902	0.999967	23698	0
NM_001704	3	0.0009599	0.0026929	0.836884	76	2	0.65025	0.65072	0.999731	15337	1
NM_001042413	3	0.00097572	0.0027363	0.836884	77	3	0.97959	0.97972	0.999731	23232	0
NM_207115	3	0.00099438	0.0027847	0.836884	78	3	0.99901	0.99898	0.999967	23697	0
NM_001001329	3	0.0009948	0.0027863	0.836884	79	3	0.99901	0.99898	0.999967	23696	0
NM_024096	3	0.0010111	0.0028347	0.84078	80	3	0.99899	0.99897	0.999967	23695	0
NM_001127717	3	0.0010296	0.0028894	0.846412	81	3	0.99897	0.99895	0.999967	23694	0
NM_002373	3	0.0010452	0.0029311	0.847628	82	2	0.31335	0.39377	0.995378	9363	1
NM_001261408	3	0.00106	0.0029733	0.847628	83	3	0.99894	0.99892	0.999967	23693	0
NM_032172	3	0.0010783	0.0030237	0.847628	84	3	0.99892	0.9989	0.999967	23692	0
NM_033449	3	0.0010878	0.0030517	0.847628	85	1	0.23155	0.34463	0.995378	8179	1
NM_001039140	3	0.0010947	0.0030722	0.847628	86	2	0.7439	0.74391	0.999731	17546	0
NM_016647	3	0.0011305	0.0031706	0.855577	87	2	0.49699	0.51983	0.999731	12320	1
NM_001079685	3	0.001132	0.0031777	0.855577	88	3	0.97462	0.97469	0.999731	23114	0
NM_001428	3	0.0011644	0.0032574	0.855577	89	3	0.99884	0.99881	0.999967	23691	0
NM_001256438	3	0.0011731	0.0032791	0.855577	90	1	0.66471	0.66484	0.999731	15670	1
NM_006164	3	0.0012158	0.0034026	0.855577	91	2	0.77709	0.77703	0.999731	18305	0
NM_052898	3	0.0012169	0.003406	0.855577	92	3	0.98146	0.98159	0.999731	23276	0
NM_020660	3	0.0012195	0.0034135	0.855577	93	3	0.99878	0.99876	0.999967	23690	0
NM_012217	3	0.0012323	0.0034469	0.855577	94	3	0.93868	0.93865	0.999731	22219	0
NM_001128615	3	0.0012494	0.0034999	0.855577	95	2	0.58567	0.59166	0.999731	13948	1
NM_033516	3	0.0012554	0.0035157	0.855577	96	3	0.99874	0.99872	0.999967	23689	0
NM_001242418	3	0.0012584	0.0035216	0.855577	97	2	0.23513	0.34671	0.995378	8230	1
NM_006936	3	0.0012632	0.0035337	0.855577	98	3	0.97888	0.979	0.999731	23218	0
NM_001040443	3	0.0012822	0.0035796	0.856661	99	3	0.97903	0.97914	0.999731	23223	0
NM_052925	3	0.0013011	0.0036263	0.856661	100	1	0.27957	0.37304	0.995378	8869	1
NM_144695	3	0.0013109	0.0036497	0.856661	101	3	0.99869	0.99867	0.999967	23688	0
NM_001206650	2	0.001335	0.0037189	0.856661	102	2	0.99866	0.99864	0.999967	23687	0
NM_032151	3	0.0013437	0.0037348	0.856661	103	2	0.88124	0.8811	0.999731	20781	0
NM_014873	3	0.00136	0.0037807	0.856661	104	3	0.99864	0.99861	0.999967	23686	0
NM_004502	3	0.0013863	0.0038462	0.856661	105	1	0.77923	0.77919	0.999731	18363	0
NM_001130997	3	0.0013978	0.0038829	0.856661	106	2	0.54846	0.56027	0.999731	13239	1
NM_170743	3	0.0014088	0.0039121	0.856661	107	3	0.99859	0.99857	0.999967	23685	0
NM_014786	3	0.001419	0.0039367	0.856661	108	3	0.99858	0.99855	0.999967	23684	0
NM_015091	3	0.0014217	0.0039451	0.856661	109	3	0.99858	0.99855	0.999967	23683	0
NM_144616	3	0.001429	0.0039714	0.856661	110	1	0.1313	0.21582	0.995378	5120	2
NM_001161819	3	0.0014528	0.0040377	0.863126	111	2	0.016066	0.041396	0.922274	1048	1
NM_001278482	3	0.0014863	0.0041208	0.873011	112	2	0.66989	0.67003	0.999731	15804	0
NM_003721	3	0.0015088	0.0041829	0.87834	113	3	0.96087	0.96107	0.999731	22751	0
NM_001144967	3	0.001533	0.0042497	0.88217	114	3	0.99847	0.99843	0.999967	23682	0
NM_032575	3	0.0015563	0.0043131	0.88217	115	3	0.99175	0.99178	0.999731	23522	0
NM_024551	3	0.0015569	0.0043135	0.88217	116	2	0.50504	0.52598	0.999731	12453	1
NM_016463	3	0.0015995	0.0044266	0.88217	117	2	0.33495	0.4074	0.995378	9709	1
NM_001024939	3	0.0015997	0.0044274	0.88217	118	3	0.9984	0.99836	0.999967	23681	0
NM_001079911	3	0.0016045	0.0044408	0.88217	119	3	0.93559	0.93557	0.999731	22150	0
NM_001160372	3	0.0016299	0.0045197	0.88217	120	3	0.998	0.99796	0.999967	23677	0
NM_000490	3	0.0016421	0.0045543	0.88217	121	2	0.48918	0.51391	0.999731	12161	1
NM_020827	3	0.0016515	0.0045841	0.88217	122	2	0.85387	0.85386	0.999731	20107	0
NM_014153	3	0.0016848	0.0046653	0.88217	123	2	0.81151	0.81147	0.999731	19110	0
NM_025261	3	0.0017274	0.0047746	0.88217	124	3	0.95863	0.95882	0.999731	22695	0
NM_002833	3	0.0017421	0.0048138	0.88217	125	3	0.99826	0.99823	0.999967	23680	0
NM_001289022	3	0.00177	0.004894	0.88217	126	1	0.79941	0.79932	0.999731	18832	0
NM_020370	3	0.0017861	0.0049411	0.88217	127	2	0.77113	0.7711	0.999731	18161	0
NM_018538	3	0.0018126	0.0050141	0.88217	128	3	0.98029	0.98044	0.999731	23246	0
NM_138811	3	0.0018128	0.0050145	0.88217	129	3	0.98602	0.98611	0.999731	23393	0
NM_212552	3	0.0018294	0.005059	0.88217	130	2	0.082282	0.14861	0.985494	3573	1
NM_013247	3	0.0018553	0.0051272	0.88217	131	2	0.81084	0.81079	0.999731	19096	0
NM_153268	3	0.0018669	0.0051573	0.88217	132	3	0.97014	0.97025	0.999731	23003	0
NM_173092	3	0.001879	0.0051998	0.88217	133	3	0.99812	0.99809	0.999967	23679	0
NM_001207069	3	0.0018979	0.0052491	0.88217	134	1	0.47919	0.50643	0.999731	11981	1
NM_006910	3	0.0019026	0.005262	0.88217	135	2	0.53276	0.54761	0.999731	12953	1
NM_173647	3	0.0019047	0.0052682	0.88217	136	2	0.59509	0.59998	0.999731	14162	1
NM_002490	3	0.0019174	0.0053	0.88217	137	2	0.6937	0.69387	0.999731	16345	0
NM_015131	3	0.0019366	0.0053555	0.88217	138	2	0.51378	0.53271	0.999731	12605	1
NM_201281	3	0.0019405	0.0053676	0.88217	139	3	0.98609	0.98618	0.999731	23395	0
NM_003419	3	0.0019537	0.0054039	0.88217	140	3	0.98463	0.98473	0.999731	23353	0
NM_001276464	3	0.0019831	0.0054861	0.88217	141	2	0.79238	0.79229	0.999731	18669	0
NM_001284404	3	0.0019869	0.0054998	0.88217	142	3	0.99801	0.99797	0.999967	23678	0
NM_020401	3	0.0020054	0.0055503	0.88217	143	2	0.74232	0.74234	0.999731	17513	0
NM_002246	3	0.0020133	0.005572	0.88217	144	3	0.99799	0.99794	0.999967	23676	0
NM_000491	3	0.0020184	0.0055858	0.88217	145	3	0.97462	0.97469	0.999731	23115	0
NM_017881	3	0.0020257	0.0056058	0.88217	146	1	0.060224	0.11744	0.977105	2824	1
NM_001136138	3	0.0020372	0.0056367	0.88217	147	3	0.99796	0.99792	0.999967	23675	0
NM_001004360	3	0.0020489	0.0056642	0.88217	148	2	0.34588	0.4144	0.996653	9865	1
NM_001956	3	0.0020533	0.0056751	0.88217	149	2	0.36049	0.42386	0.996661	10087	1
NM_032935	3	0.0020665	0.0057072	0.88217	150	2	0.87072	0.87078	0.999731	20521	0
NM_203475	3	0.0020775	0.0057373	0.88217	151	2	0.26663	0.36518	0.995378	8685	1
NM_001099650	3	0.0021041	0.0058195	0.88217	152	3	0.93351	0.93352	0.999731	22095	0
NM_198045	3	0.002111	0.0058366	0.88217	153	2	0.023898	0.060047	0.965092	1474	1
NM_012387	3	0.0021157	0.0058503	0.88217	154	3	0.99788	0.99783	0.999967	23674	0
NM_014141	3	0.0021263	0.0058808	0.88217	155	3	0.99787	0.99782	0.999967	23673	0
NM_032193	3	0.0021375	0.0059121	0.88217	156	2	0.82187	0.82194	0.999731	19350	0
NM_001005751	3	0.0021536	0.005948	0.88217	157	1	0.13282	0.21791	0.995378	5167	2
NM_019555	3	0.002178	0.0060168	0.88217	158	2	0.86099	0.86098	0.999731	20275	0
NM_001286683	3	0.0021962	0.0060682	0.88217	159	1	0.2667	0.36522	0.995378	8687	1
NM_152231	3	0.0022324	0.0061741	0.88217	160	3	0.99777	0.99772	0.999967	23672	0
NM_207321	3	0.0022388	0.0061883	0.88217	161	2	0.74545	0.74547	0.999731	17588	0
NM_013391	3	0.0022684	0.0062584	0.88217	162	3	0.99773	0.99768	0.999967	23671	0
NM_014423	3	0.0022814	0.0062893	0.88217	163	2	0.86611	0.86617	0.999731	20406	0
NM_001005353	3	0.002324	0.0064172	0.88217	164	1	0.71052	0.71069	0.999731	16721	0
NM_002811	3	0.0023365	0.00645	0.88217	165	2	0.08715	0.15533	0.986653	3734	1
NM_052840	3	0.0023667	0.0065284	0.88217	166	2	0.23702	0.34781	0.995378	8256	1
NM_017925	3	0.0023905	0.0065906	0.88217	167	3	0.99128	0.99132	0.999731	23509	0
NM_015893	3	0.0024093	0.0066432	0.88217	168	2	0.36258	0.42521	0.996661	10120	1
NM_004961	3	0.0024519	0.0067583	0.88217	169	3	0.97403	0.97409	0.999731	23096	0
NM_014798	3	0.0024572	0.0067692	0.88217	170	2	0.59544	0.60028	0.999731	14171	1
NM_001173467	3	0.0024919	0.0068576	0.88217	171	3	0.99751	0.99748	0.999926	23670	0
NM_001170716	3	0.0024959	0.0068716	0.88217	172	3	0.9975	0.99748	0.999926	23669	0
NM_181776	3	0.0025222	0.0069436	0.88217	173	3	0.99485	0.99487	0.999731	23607	0
NM_021128	3	0.0025371	0.0069782	0.88217	174	1	0.63562	0.6368	0.999731	15022	1
NM_006195	3	0.0025797	0.0070942	0.88217	175	3	0.96874	0.9689	0.999731	22970	0
NM_153261	3	0.0025824	0.0071026	0.88217	176	3	0.99742	0.9974	0.999926	23668	0
NM_207325	3	0.0025953	0.0071389	0.88217	177	3	0.9974	0.99739	0.999926	23667	0
NM_152401	3	0.0025977	0.007143	0.88217	178	3	0.9974	0.99739	0.999926	23666	0
NM_178569	3	0.002598	0.0071439	0.88217	179	3	0.99504	0.99504	0.999731	23610	0
NM_032839	3	0.0026005	0.0071501	0.88217	180	3	0.99679	0.99678	0.999926	23647	0
NM_020650	3	0.0026058	0.0071627	0.88217	181	3	0.99739	0.99739	0.999926	23665	0
NM_004801	3	0.0026196	0.0071973	0.88217	182	3	0.99738	0.99737	0.999926	23664	0
NM_001142314	3	0.0026223	0.007206	0.88217	183	3	0.98649	0.98654	0.999731	23403	0
NM_001111125	3	0.0026252	0.0072131	0.88217	184	2	0.21924	0.33217	0.995378	7867	1
NM_001190442	3	0.0026285	0.0072261	0.88217	185	3	0.99737	0.99736	0.999926	23663	0
NM_007332	3	0.002644	0.0072615	0.88217	186	3	0.99736	0.99735	0.999926	23662	0
NM_015483	3	0.0026599	0.0073058	0.88217	187	3	0.95947	0.95967	0.999731	22715	0
NM_152293	3	0.0026624	0.0073125	0.88217	188	3	0.95322	0.95337	0.999731	22559	0
NM_152489	3	0.0026649	0.0073221	0.88217	189	1	0.68652	0.6867	0.999731	16185	0
NM_018178	3	0.0026858	0.0073692	0.88217	190	3	0.99731	0.99731	0.999926	23661	0
NM_001258331	3	0.0026924	0.0073896	0.88217	191	3	0.92292	0.92299	0.999731	21828	0
NM_181725	3	0.0027427	0.0075198	0.88217	192	2	0.19961	0.30665	0.995378	7256	1
NM_152766	3	0.0027501	0.0075411	0.88217	193	1	0.10379	0.17844	0.995109	4254	1
NM_002542	3	0.0027927	0.0076701	0.88217	194	3	0.96554	0.96568	0.999731	22869	0
NM_032025	3	0.0028097	0.0077143	0.88217	195	3	0.99719	0.99718	0.999926	23660	0
NM_002780	3	0.0028156	0.0077297	0.88217	196	3	0.99718	0.99717	0.999926	23659	0
NM_001178035	3	0.0028293	0.0077623	0.88217	197	3	0.98297	0.98305	0.999731	23308	0
NM_004952	3	0.0028353	0.0077798	0.88217	198	1	0.44918	0.48437	0.999731	11481	1
NM_001145290	3	0.0028421	0.0077961	0.88217	199	2	0.4459	0.48202	0.999731	11425	1
NM_001282922	3	0.0028558	0.0078311	0.88217	200	3	0.99714	0.99713	0.999926	23658	0
NM_001145210	3	0.0028679	0.0078603	0.88217	201	2	0.8155	0.8154	0.999731	19200	0
NM_001042610	3	0.002886	0.0079025	0.88217	202	3	0.99711	0.9971	0.999926	23657	0
NM_001308	3	0.0029205	0.0079922	0.88217	203	3	0.95787	0.95807	0.999731	22671	0
NM_006589	3	0.002925	0.0080064	0.88217	204	3	0.93274	0.93276	0.999731	22079	0
NM_080878	3	0.0029329	0.0080243	0.88217	205	2	0.76361	0.76349	0.999731	17970	0
NM_171830	3	0.0029355	0.0080322	0.88217	206	3	0.92292	0.92299	0.999731	21829	0
NM_001243743	3	0.0029631	0.0081136	0.88217	207	2	0.37189	0.43131	0.997448	10259	1
NM_018427	3	0.0029643	0.0081186	0.88217	208	2	0.79216	0.79206	0.999731	18665	0
NM_001178102	3	0.0029748	0.0081474	0.88217	209	2	0.25002	0.35538	0.995378	8447	1
NM_004819	3	0.0029801	0.0081583	0.88217	210	2	0.87026	0.87033	0.999731	20508	0
NM_001190790	3	0.0030056	0.0082292	0.88217	211	2	0.45115	0.4858	0.999731	11513	1
NM_015919	1	0.0030087	0.0082405	0.88217	212	1	0.99699	0.99698	0.999926	23656	0
NM_001033930	3	0.0030144	0.0082584	0.88217	213	3	0.96742	0.96758	0.999731	22927	0
NM_001198721	3	0.0030223	0.0082768	0.88217	214	2	0.84253	0.84252	0.999731	19832	0
NM_001051	3	0.003024	0.0082826	0.88217	215	3	0.99698	0.99696	0.999926	23655	0
NM_052891	3	0.0030365	0.0083106	0.88217	216	3	0.99696	0.99694	0.999926	23654	0
NM_138316	3	0.0030418	0.0083202	0.88217	217	3	0.99696	0.99693	0.999926	23653	0
NM_005157	3	0.0030482	0.0083348	0.88217	218	1	0.831	0.83102	0.999731	19558	0
NM_000336	3	0.0030562	0.0083623	0.88217	219	3	0.99694	0.99691	0.999926	23652	0
NM_024946	3	0.0030715	0.0084045	0.88217	220	3	0.99693	0.9969	0.999926	23651	0
NM_001081461	3	0.0030832	0.0084362	0.88217	221	3	0.99692	0.99689	0.999926	23650	0
NM_017434	3	0.0030908	0.0084562	0.88217	222	1	0.36227	0.42501	0.996661	10113	1
NM_003922	3	0.0031051	0.0084862	0.88217	223	3	0.99246	0.99245	0.999731	23542	0
NM_001243768	3	0.0031293	0.0085499	0.88217	224	3	0.96886	0.96903	0.999731	22975	0
NM_001835	3	0.0031334	0.008563	0.88217	225	1	0.87197	0.87203	0.999731	20555	0
NM_001823	3	0.0031497	0.0086068	0.88217	226	3	0.99685	0.99683	0.999926	23649	0
NM_018389	3	0.0031536	0.0086156	0.88217	227	2	0.88191	0.88176	0.999731	20798	0
NM_001258026	3	0.0031644	0.0086452	0.88217	228	3	0.98667	0.98672	0.999731	23406	0
NM_001136218	3	0.003176	0.0086803	0.88217	229	1	0.11861	0.19859	0.995378	4718	2
NM_178859	3	0.003178	0.008684	0.88217	230	2	0.81473	0.81467	0.999731	19189	0
NM_013410	3	0.0031921	0.0087216	0.88217	231	3	0.99681	0.99679	0.999926	23648	0
NM_005453	3	0.0031943	0.0087262	0.88217	232	2	0.88704	0.88687	0.999731	20918	0
NM_001008727	3	0.003197	0.0087308	0.88217	233	3	0.93107	0.93109	0.999731	22027	0
NM_001195194	3	0.0032025	0.0087441	0.88217	234	2	0.86372	0.86375	0.999731	20343	0
NM_181701	3	0.0032186	0.0087954	0.88217	235	2	0.80011	0.80001	0.999731	18846	0
NM_001256168	3	0.0032236	0.0088092	0.88217	236	3	0.99678	0.99677	0.999926	23646	0
NM_001127464	3	0.0032243	0.0088113	0.88217	237	2	0.75685	0.75678	0.999731	17820	0
NM_001282438	1	0.0032647	0.0089327	0.887961	238	1	0.99674	0.99672	0.999926	23645	0
NM_000262	3	0.0032682	0.008944	0.887961	239	2	0.2389	0.34887	0.995378	8281	1
NM_001003841	3	0.0033038	0.0090299	0.890493	240	3	0.9852	0.98531	0.999731	23367	0
NM_001281444	3	0.0033097	0.0090445	0.890493	241	3	0.96945	0.96958	0.999731	22989	0
NM_182625	3	0.0033463	0.0091426	0.894594	242	2	0.85812	0.8581	0.999731	20201	0
NM_022072	3	0.0033711	0.0092064	0.894594	243	3	0.99663	0.99662	0.999926	23644	0
NM_018897	3	0.0033793	0.0092294	0.894594	244	2	0.42915	0.47023	0.999731	11144	1
NM_000705	3	0.0033889	0.0092528	0.894594	245	2	0.48735	0.51248	0.999731	12126	1
NM_001009894	3	0.0034029	0.0092907	0.894594	246	3	0.9966	0.99659	0.999926	23643	0
NM_001126181	3	0.0034299	0.0093583	0.894594	247	2	0.88985	0.8897	0.999731	20984	0
NM_030790	3	0.0034315	0.0093617	0.894594	248	3	0.99445	0.99447	0.999731	23595	0
NM_001098270	3	0.0034412	0.0093888	0.894594	249	2	0.70085	0.70099	0.999731	16500	0
NM_014943	3	0.0034572	0.0094255	0.894594	250	3	0.99654	0.99654	0.999926	23642	0
NM_001270469	3	0.0034741	0.0094735	0.894983	251	2	0.83714	0.8372	0.999731	19699	0
NM_002387	3	0.0034954	0.0095332	0.894983	252	3	0.9965	0.99651	0.999926	23641	0
NM_148961	3	0.0035166	0.0095899	0.894983	253	1	0.48685	0.51212	0.999731	12115	1
NM_174905	3	0.003535	0.0096366	0.894983	254	2	0.8679	0.86794	0.999731	20451	0
NM_001256346	3	0.003555	0.0096838	0.894983	255	2	0.73571	0.73575	0.999731	17333	0
NM_032944	3	0.0035592	0.0096951	0.894983	256	2	0.73069	0.73078	0.999731	17218	0
NM_001278197	3	0.0036018	0.0097994	0.894983	257	2	0.73589	0.73593	0.999731	17338	0
NM_014862	3	0.0036037	0.009804	0.894983	258	3	0.9964	0.99638	0.999926	23640	0
NM_014159	3	0.0036444	0.0099058	0.894983	259	2	0.76027	0.76015	0.999731	17906	0
NM_133476	3	0.0036765	0.0099817	0.894983	260	3	0.95886	0.95905	0.999731	22702	0
NM_145288	3	0.0036784	0.0099863	0.894983	261	3	0.99632	0.99631	0.999926	23639	0
NM_006174	3	0.0036869	0.010016	0.894983	262	2	0.71173	0.7119	0.999731	16757	0
NM_003468	3	0.003711	0.010079	0.894983	263	3	0.99629	0.99628	0.999926	23638	0
NM_001145665	3	0.0037146	0.010091	0.894983	264	2	0.87067	0.87073	0.999731	20520	0
NM_032299	3	0.0037263	0.010123	0.894983	265	2	0.47375	0.50246	0.999731	11879	1
NM_001145445	3	0.0037295	0.010129	0.894983	266	2	0.097751	0.17014	0.992936	4065	1
NM_139053	3	0.0037721	0.010265	0.894983	267	2	0.13446	0.22011	0.995378	5226	1
NM_001077692	3	0.0037941	0.010318	0.894983	268	3	0.93907	0.93904	0.999731	22223	0
NM_001184	3	0.0038146	0.010372	0.894983	269	3	0.99614	0.99612	0.999926	23636	0
NM_017629	3	0.0038208	0.010388	0.894983	270	2	0.59427	0.59926	0.999731	14141	1
NM_001258464	3	0.0038351	0.010431	0.894983	271	3	0.99616	0.99615	0.999926	23637	0
NM_001321	3	0.0038417	0.010453	0.894983	272	2	0.65987	0.66008	0.999731	15559	1
NM_006562	3	0.0038446	0.010464	0.894983	273	2	0.69519	0.69535	0.999731	16385	0
NM_004423	3	0.0038572	0.01049	0.894983	274	1	0.22876	0.34303	0.995378	8139	1
NM_003051	3	0.0038685	0.010516	0.894983	275	2	0.39541	0.44701	0.999033	10615	1
NM_017934	3	0.0038719	0.010525	0.894983	276	3	0.99613	0.99611	0.999926	23635	0
NM_001291527	3	0.0038805	0.010552	0.894983	277	3	0.98633	0.98639	0.999731	23401	0
NM_012257	3	0.0038998	0.010591	0.894983	278	2	0.77051	0.77047	0.999731	18144	0
NM_001129830	3	0.0039015	0.010596	0.894983	279	2	0.82415	0.82423	0.999731	19406	0
NM_198483	3	0.0039045	0.010604	0.894983	280	3	0.97507	0.97513	0.999731	23122	0
NM_001199207	3	0.0039423	0.010708	0.894983	281	3	0.98993	0.98996	0.999731	23477	0
NM_001270441	3	0.0040103	0.010898	0.894983	282	3	0.99599	0.99598	0.999926	23634	0
NM_001261839	3	0.0040133	0.010904	0.894983	283	2	0.24136	0.35028	0.995378	8318	1
NM_003020	3	0.0040135	0.010906	0.894983	284	3	0.99599	0.99598	0.999926	23633	0
NM_001020819	3	0.0040275	0.010941	0.894983	285	2	0.76584	0.76577	0.999731	18027	0
NM_001204160	3	0.00407	0.011052	0.894983	286	1	0.63	0.63156	0.999731	14910	1
NM_005593	3	0.0040867	0.011097	0.894983	287	2	0.87381	0.87384	0.999731	20591	0
NM_206873	3	0.0041113	0.011156	0.894983	288	3	0.96454	0.96465	0.999731	22843	0
NM_001281517	3	0.0041531	0.011257	0.894983	289	3	0.99585	0.99583	0.999873	23632	0
NM_173800	3	0.0041551	0.011263	0.894983	290	2	0.41539	0.46067	0.999731	10916	1
NM_153363	3	0.0041977	0.011368	0.894983	291	2	0.46685	0.49731	0.999731	11763	1
NM_001098725	3	0.0042229	0.01143	0.894983	292	2	0.31216	0.39304	0.995378	9345	1
NM_181702	3	0.0042403	0.011478	0.894983	293	2	0.19862	0.30534	0.995378	7224	1
NM_001494	3	0.0042573	0.01153	0.894983	294	2	0.77946	0.77944	0.999731	18367	0
NM_175887	3	0.0042789	0.011589	0.894983	295	3	0.99572	0.99571	0.999799	23631	0
NM_003027	3	0.0042828	0.011597	0.894983	296	3	0.92187	0.92194	0.999731	21804	0
NM_001286	3	0.0042887	0.011612	0.894983	297	3	0.94981	0.94996	0.999731	22467	0
NM_001606	3	0.004295	0.011625	0.894983	298	3	0.99358	0.99358	0.999731	23572	0
NM_001126	3	0.0043223	0.011696	0.894983	299	3	0.99568	0.99566	0.999793	23630	0
NM_003644	3	0.0043254	0.011703	0.894983	300	1	0.1674	0.26428	0.995378	6249	1
NM_173503	3	0.0043391	0.01174	0.894983	301	2	0.81863	0.8186	0.999731	19275	0
NM_147161	3	0.0043679	0.011816	0.894983	302	1	0.73145	0.73154	0.999731	17242	0
NM_001284418	3	0.0044026	0.01192	0.894983	303	3	0.94044	0.94041	0.999731	22262	0
NM_032326	3	0.0044105	0.011938	0.894983	304	2	0.63882	0.63977	0.999731	15087	1
NM_001161546	3	0.0044164	0.011954	0.894983	305	3	0.99558	0.99556	0.999731	23629	0
NM_020314	3	0.0044345	0.012003	0.894983	306	2	0.17621	0.27591	0.995378	6540	1
NM_014426	3	0.0044406	0.012023	0.894983	307	3	0.99556	0.99553	0.999731	23628	0
NM_002213	3	0.004453	0.012059	0.894983	308	2	0.89507	0.89493	0.999731	21113	0
NM_173566	3	0.0044601	0.012081	0.894983	309	3	0.93213	0.93213	0.999731	22054	0
NM_001254748	3	0.004495	0.012178	0.894983	310	3	0.9955	0.99548	0.999731	23627	0
NM_001136263	3	0.0044956	0.012179	0.894983	311	2	0.63983	0.64076	0.999731	15108	1
NM_001079673	3	0.0044986	0.012185	0.894983	312	3	0.98588	0.98597	0.999731	23384	0
NM_001128833	3	0.0045019	0.012197	0.894983	313	3	0.97781	0.97789	0.999731	23191	0
NM_198066	3	0.004518	0.01224	0.894983	314	3	0.94333	0.94332	0.999731	22334	0
NM_006917	3	0.0045265	0.012264	0.894983	315	3	0.99547	0.99546	0.999731	23626	0
NM_017944	3	0.00453	0.012275	0.894983	316	3	0.99547	0.99545	0.999731	23625	0
NM_178129	3	0.0045381	0.012298	0.894983	317	2	0.67081	0.67096	0.999731	15823	0
NM_198149	3	0.0045807	0.012404	0.894983	318	1	0.020492	0.051959	0.948366	1300	1
NM_032965	3	0.0045969	0.01245	0.894983	319	3	0.9954	0.9954	0.999731	23624	0
NM_001080478	3	0.0045989	0.012454	0.894983	320	2	0.66861	0.66871	0.999731	15772	1
NM_000069	3	0.0046229	0.012512	0.894983	321	3	0.99538	0.99538	0.999731	23623	0
NM_152999	3	0.0046232	0.012513	0.894983	322	2	0.85029	0.85025	0.999731	20019	0
NM_182720	3	0.0046265	0.012521	0.894983	323	3	0.99537	0.99537	0.999731	23622	0
NM_001098211	3	0.0046413	0.01256	0.894983	324	2	0.90729	0.90725	0.999731	21453	0
NM_001146345	3	0.0046658	0.012621	0.894983	325	2	0.91294	0.91294	0.999731	21591	0
NM_182849	3	0.0046848	0.01267	0.894983	326	3	0.99532	0.99532	0.999731	23620	0
NM_001100588	3	0.0047036	0.012712	0.894983	327	3	0.97222	0.97232	0.999731	23050	0
NM_002493	3	0.0047083	0.012727	0.894983	328	2	0.90181	0.90174	0.999731	21277	0
NM_015694	3	0.0047111	0.012734	0.894983	329	3	0.99529	0.99529	0.999731	23619	0
NM_198232	3	0.0047508	0.012832	0.894983	330	1	0.13307	0.21828	0.995378	5179	2
NM_152380	3	0.0047605	0.012861	0.894983	331	3	0.99524	0.99524	0.999731	23618	0
NM_016653	3	0.0047795	0.012905	0.894983	332	3	0.97691	0.97698	0.999731	23170	0
NM_001166244	3	0.0047928	0.012941	0.894983	333	3	0.96498	0.96511	0.999731	22855	0
NM_001083537	3	0.0047934	0.012942	0.894983	334	1	0.21329	0.32444	0.995378	7702	1
NM_173167	3	0.0047956	0.012946	0.894983	335	3	0.9952	0.9952	0.999731	23617	0
NM_001199824	3	0.0047961	0.012947	0.894983	336	2	0.81811	0.81808	0.999731	19260	0
NM_012432	3	0.004798	0.012953	0.894983	337	3	0.9952	0.9952	0.999731	23616	0
NM_002385	3	0.0047994	0.012956	0.894983	338	3	0.92324	0.92332	0.999731	21836	0
NM_001242839	3	0.004816	0.013003	0.894983	339	2	0.89547	0.89533	0.999731	21128	0
NM_001171195	3	0.0048174	0.013007	0.894983	340	3	0.99518	0.99518	0.999731	23615	0
NM_001204839	3	0.0048359	0.013054	0.894983	341	1	0.81113	0.81109	0.999731	19101	0
NM_003981	3	0.004836	0.013054	0.894983	342	2	0.57763	0.58471	0.999731	13794	1
NM_152278	3	0.0048427	0.013069	0.894983	343	2	0.48186	0.5084	0.999731	12023	1
NM_000661	3	0.0048785	0.013162	0.894983	344	2	0.77724	0.77718	0.999731	18309	0
NM_001146008	3	0.0048872	0.013184	0.894983	345	3	0.99511	0.99511	0.999731	23614	0
NM_173619	3	0.0048908	0.013195	0.894983	346	3	0.99511	0.99511	0.999731	23613	0
NM_001290056	3	0.0049155	0.013254	0.894983	347	3	0.99508	0.99508	0.999731	23612	0
NM_000512	3	0.004921	0.013269	0.894983	348	1	0.13879	0.22603	0.995378	5363	1
NM_024571	3	0.0049217	0.01327	0.894983	349	3	0.99508	0.99508	0.999731	23611	0
NM_016186	3	0.0049264	0.013286	0.894983	350	2	0.010229	0.027049	0.904465	701	1
NM_016249	3	0.0049973	0.01347	0.894983	351	2	0.84065	0.84068	0.999731	19790	0
NM_001276267	3	0.0050061	0.013491	0.894983	352	1	0.21912	0.33199	0.995378	7860	2
NM_003878	3	0.0050123	0.013504	0.894983	353	3	0.99499	0.995	0.999731	23609	0
NM_001100	3	0.0050311	0.013551	0.894983	354	3	0.99497	0.99498	0.999731	23608	0
NM_025135	3	0.005038	0.013567	0.894983	355	2	0.15305	0.24513	0.995378	5800	1
NM_001198529	3	0.0050911	0.013692	0.894983	356	1	0.0349	0.08093	0.977105	1941	2
NM_025235	3	0.0051028	0.013726	0.894983	357	2	0.72448	0.72463	0.999731	17068	0
NM_057159	3	0.0051337	0.013819	0.894983	358	2	0.90181	0.90174	0.999731	21247	0
NM_030952	3	0.0051405	0.01384	0.894983	359	2	0.71082	0.71099	0.999731	16730	0
NM_001011713	3	0.0051524	0.013869	0.894983	360	3	0.99485	0.99486	0.999731	23606	0
NM_000599	3	0.0051762	0.013931	0.894983	361	2	0.37651	0.43435	0.997702	10330	1
NM_012124	3	0.0051887	0.013965	0.894983	362	3	0.96439	0.9645	0.999731	22835	0
NM_001004019	3	0.0052009	0.014	0.894983	363	3	0.9948	0.99481	0.999731	23605	0
NM_001173542	3	0.0052163	0.014032	0.894983	364	3	0.9624	0.96258	0.999731	22791	0
NM_017563	3	0.0052575	0.014139	0.894983	365	3	0.99474	0.99476	0.999731	23604	0
NM_004566	3	0.0052612	0.014151	0.894983	366	2	0.80265	0.80252	0.999731	18907	0
NM_001040703	4	0.0052757	0.014189	0.894983	367	4	0.99472	0.99474	0.999731	23603	0
NM_145168	3	0.0052926	0.014227	0.894983	368	3	0.9364	0.93637	0.999731	22173	0
NM_001040197	3	0.0052996	0.014243	0.894983	369	2	0.34004	0.41062	0.995991	9777	1
NM_015395	3	0.0053038	0.014257	0.894983	370	2	0.38578	0.44053	0.998945	10462	1
NM_001277224	3	0.0053066	0.014263	0.894983	371	2	0.40952	0.45665	0.999731	10824	1
NM_002140	3	0.0053135	0.014283	0.894983	372	2	0.16669	0.26334	0.995378	6225	1
NM_001278511	3	0.0053205	0.014304	0.894983	373	2	0.46741	0.49774	0.999731	11771	1
NM_152891	3	0.0053209	0.014305	0.894983	374	3	0.99468	0.9947	0.999731	23602	0
NM_003454	3	0.0053345	0.01434	0.894983	375	3	0.93439	0.9344	0.999731	22113	0
NM_001242312	3	0.0053463	0.014373	0.894983	376	2	0.47133	0.50067	0.999731	11836	1
NM_001127244	3	0.0053718	0.014442	0.894983	377	3	0.99463	0.99465	0.999731	23601	0
NM_153765	3	0.0053888	0.014486	0.894983	378	1	0.8375	0.83757	0.999731	19712	0
NM_001177693	3	0.0053915	0.014493	0.894983	379	3	0.99461	0.99462	0.999731	23600	0
NM_001144903	3	0.0054152	0.014551	0.894983	380	2	0.85633	0.85629	0.999731	20157	0
NM_001288580	3	0.0054296	0.014589	0.894983	381	3	0.99457	0.99459	0.999731	23599	0
NM_001243232	3	0.0054313	0.014592	0.894983	382	2	0.68128	0.68147	0.999731	16066	0
NM_031420	3	0.0054481	0.014643	0.894983	383	3	0.99455	0.99457	0.999731	23598	0
NM_002903	3	0.0054681	0.014699	0.894983	384	3	0.96464	0.96476	0.999731	22844	0
NM_001163297	3	0.0054964	0.014775	0.894983	385	3	0.98236	0.98245	0.999731	23300	0
NM_001144823	3	0.0055011	0.014789	0.894983	386	3	0.9945	0.99452	0.999731	23597	0
NM_018290	3	0.0055164	0.014833	0.894983	387	3	0.97807	0.97817	0.999731	23195	0
NM_001740	3	0.0055238	0.01485	0.894983	388	3	0.99448	0.9945	0.999731	23596	0
NM_001286634	3	0.0055426	0.014894	0.894983	389	2	0.89694	0.89683	0.999731	21171	0
NM_152511	3	0.0055533	0.014919	0.894983	390	2	0.89099	0.89086	0.999731	21011	0
NM_001256830	3	0.0055589	0.014937	0.894983	391	1	0.88749	0.88732	0.999731	20930	0
NM_001145076	3	0.0056392	0.015137	0.894983	392	2	0.56275	0.57208	0.999731	13512	1
NM_000581	3	0.0056439	0.015148	0.894983	393	3	0.9577	0.95791	0.999731	22665	0
NM_018352	3	0.00565	0.015161	0.894983	394	2	0.59396	0.59899	0.999731	14135	1
NM_001258000	3	0.0056572	0.015173	0.894983	395	3	0.93526	0.93524	0.999731	22142	0
NM_053002	3	0.0056864	0.015258	0.894983	396	2	0.4136	0.45946	0.999731	10887	1
NM_001098721	3	0.0056894	0.015264	0.894983	397	3	0.99431	0.99432	0.999731	23594	0
NM_001284400	3	0.0057139	0.01532	0.894983	398	3	0.99429	0.9943	0.999731	23593	0
NM_024815	3	0.0057167	0.015326	0.894983	399	3	0.99428	0.99429	0.999731	23592	0
NM_001007527	3	0.005729	0.015361	0.894983	400	1	0.28357	0.37547	0.995378	8939	1
NM_024623	3	0.0057365	0.015382	0.894983	401	2	0.63128	0.63272	0.999731	14929	1
NM_000670	3	0.0057402	0.01539	0.894983	402	3	0.93697	0.93694	0.999731	22184	0
NM_213649	3	0.0057583	0.015433	0.894983	403	3	0.98147	0.9816	0.999731	23277	0
NM_001207011	3	0.0057673	0.015463	0.894983	404	3	0.99423	0.99425	0.999731	23591	0
NM_147147	3	0.0057692	0.015467	0.894983	405	3	0.96803	0.9682	0.999731	22947	0
NM_152442	3	0.0057715	0.015473	0.894983	406	1	0.86962	0.86968	0.999731	20489	0
NM_006498	3	0.0057873	0.015515	0.894983	407	3	0.92872	0.9288	0.999731	21970	0
NM_012384	3	0.0058487	0.015683	0.894983	408	3	0.99415	0.99416	0.999731	23590	0
NM_201382	3	0.0058514	0.015692	0.894983	409	3	0.99415	0.99416	0.999731	23589	0
NM_015325	3	0.0058565	0.015703	0.894983	410	3	0.93563	0.93561	0.999731	22153	0
NM_001080414	3	0.0058676	0.015726	0.894983	411	3	0.99352	0.99352	0.999731	23568	0
NM_013447	3	0.0058695	0.01573	0.894983	412	3	0.99413	0.99414	0.999731	23588	0
NM_018053	3	0.0058822	0.015761	0.894983	413	2	0.84511	0.84511	0.999731	19899	0
NM_205853	3	0.0058969	0.015802	0.894983	414	2	0.88256	0.88239	0.999731	20817	0
NM_001002811	3	0.005899	0.015808	0.894983	415	1	0.11882	0.19887	0.995378	4727	2
NM_014965	3	0.0059015	0.015814	0.894983	416	3	0.9941	0.99411	0.999731	23587	0
NM_002056	3	0.0059189	0.015864	0.894983	417	3	0.98517	0.98529	0.999731	23366	0
NM_020888	3	0.0059484	0.015938	0.894983	418	2	0.17343	0.27223	0.995378	6442	1
NM_173595	3	0.0059631	0.015977	0.894983	419	2	0.084336	0.15142	0.985494	3644	1
NM_001256598	3	0.005984	0.016036	0.894983	420	1	0.15327	0.24544	0.995378	5807	2
NM_001146264	3	0.0059939	0.016066	0.894983	421	3	0.99401	0.99401	0.999731	23586	0
NM_001163287	3	0.0060112	0.016107	0.894983	422	3	0.95845	0.95864	0.999731	22688	0
NM_005766	3	0.0060306	0.016154	0.894983	423	3	0.99397	0.99397	0.999731	23585	0
NM_006722	3	0.0060547	0.016223	0.894983	424	3	0.99395	0.99395	0.999731	23584	0
NM_001098811	3	0.006069	0.01626	0.894983	425	2	0.85099	0.85094	0.999731	20039	0
NM_001204386	3	0.0060818	0.016289	0.894983	426	2	0.31727	0.39627	0.995378	9429	1
NM_001013642	3	0.0060959	0.016327	0.894983	427	3	0.9939	0.99391	0.999731	23583	0
NM_006784	3	0.0061115	0.016362	0.894983	428	2	0.23684	0.34771	0.995378	8253	1
NM_004060	3	0.0061565	0.016485	0.894983	429	2	0.88192	0.88177	0.999731	20799	0
NM_001286504	3	0.006176	0.016532	0.894983	430	3	0.99382	0.99381	0.999731	23582	0
NM_014062	3	0.0061875	0.016562	0.894983	431	3	0.99381	0.9938	0.999731	23581	0
NM_001005470	3	0.006194	0.016581	0.894983	432	2	0.18395	0.28611	0.995378	6773	1
NM_001020818	3	0.0061965	0.01659	0.894983	433	2	0.53328	0.54801	0.999731	12965	1
NM_004128	3	0.006239	0.016701	0.894983	434	2	0.0018126	0.0050508	0.852188	138	1
NM_001289061	3	0.0062392	0.016701	0.894983	435	2	0.84656	0.84651	0.999731	19929	0
NM_002976	3	0.0062495	0.016735	0.894983	436	3	0.99375	0.99374	0.999731	23580	0
NM_002451	3	0.0062542	0.016746	0.894983	437	2	0.90181	0.90174	0.999731	21285	0
NM_004497	3	0.0062597	0.016758	0.894983	438	3	0.99374	0.99374	0.999731	23579	0
NM_001145453	3	0.0062655	0.016776	0.894983	439	3	0.99373	0.99373	0.999731	23578	0
NM_001176	3	0.0062669	0.016781	0.894983	440	3	0.99373	0.99373	0.999731	23577	0
NM_018700	3	0.0062694	0.016788	0.894983	441	2	0.86844	0.86848	0.999731	20465	0
NM_005868	3	0.0062769	0.016811	0.894983	442	2	0.91652	0.91659	0.999731	21676	0
NM_001204255	3	0.0062815	0.016822	0.894983	443	3	0.93137	0.93138	0.999731	22036	0
NM_004055	3	0.006296	0.016859	0.894983	444	3	0.9937	0.9937	0.999731	23576	0
NM_002593	3	0.0063208	0.016914	0.894983	445	3	0.99368	0.99368	0.999731	23575	0
NM_002348	3	0.006324	0.016923	0.894983	446	1	0.43206	0.47224	0.999731	11198	1
NM_001163809	3	0.0063665	0.017032	0.894983	447	3	0.98122	0.98136	0.999731	23271	0
NM_020653	3	0.0063734	0.01705	0.894983	448	3	0.99363	0.99362	0.999731	23574	0
NM_022437	3	0.0064028	0.01713	0.894983	449	3	0.9936	0.9936	0.999731	23573	0
NM_001286342	3	0.006409	0.017149	0.894983	450	3	0.92421	0.9243	0.999731	21863	0
NM_001142886	3	0.00641	0.017153	0.894983	451	2	0.043088	0.092851	0.977105	2228	1
NM_000505	3	0.0064252	0.017191	0.894983	452	2	0.14753	0.23781	0.995378	5626	1
NM_000924	3	0.0064406	0.017238	0.894983	453	2	0.49383	0.51742	0.999731	12256	1
NM_030570	3	0.0064515	0.017266	0.894983	454	2	0.8349	0.83496	0.999731	19653	0
NM_001010867	3	0.0064648	0.017305	0.894983	455	3	0.99354	0.99354	0.999731	23571	0
NM_001200049	3	0.0064663	0.017309	0.894983	456	3	0.99353	0.99354	0.999731	23570	0
NM_001145029	3	0.0064752	0.01733	0.894983	457	3	0.99352	0.99353	0.999731	23569	0
NM_001134771	3	0.006494	0.01738	0.894983	458	2	0.89184	0.89174	0.999731	21030	0
NM_022055	3	0.0065058	0.01741	0.894983	459	2	0.89627	0.89614	0.999731	21145	0
NM_001127322	1	0.0065223	0.017448	0.894983	460	1	0.99348	0.99347	0.999731	23567	0
NM_020406	3	0.0065242	0.017453	0.894983	461	3	0.99348	0.99347	0.999731	23566	0
NM_017993	3	0.0065365	0.01749	0.894983	462	2	0.90181	0.90174	0.999731	21331	0
NM_012228	3	0.0065391	0.017497	0.894983	463	3	0.99346	0.99345	0.999731	23565	0
NM_001858	3	0.0065405	0.017501	0.894983	464	2	0.52703	0.54308	0.999731	12854	1
NM_015069	3	0.006579	0.017598	0.895723	465	3	0.99324	0.99324	0.999731	23559	0
NM_015441	3	0.0065885	0.017624	0.895723	466	3	0.99341	0.9934	0.999731	23564	0
NM_001184795	3	0.0066062	0.017661	0.895723	467	3	0.95306	0.95321	0.999731	22556	0
NM_001120	3	0.0066179	0.017692	0.895723	468	2	0.83433	0.83436	0.999731	19637	0
NM_001286106	3	0.0066215	0.017705	0.895723	469	1	0.18623	0.2891	0.995378	6836	2
NM_005760	3	0.0066532	0.017781	0.896894	470	3	0.99335	0.99334	0.999731	23563	0
NM_181889	3	0.0066639	0.017807	0.896894	471	2	0.89007	0.88993	0.999731	20988	0
NM_016287	3	0.0066865	0.017868	0.896894	472	3	0.99331	0.9933	0.999731	23562	0
NM_001166060	3	0.0066925	0.017883	0.896894	473	3	0.99331	0.99329	0.999731	23561	0
NM_152634	3	0.0067074	0.017923	0.896894	474	2	0.20127	0.30883	0.995378	7321	1
NM_001286805	3	0.0067183	0.017955	0.896894	475	3	0.99328	0.99327	0.999731	23560	0
NM_173573	3	0.0067489	0.018035	0.899045	476	1	0.32271	0.39965	0.995378	9505	1
NM_001111032	3	0.0067914	0.018148	0.900112	477	2	0.61174	0.61486	0.999731	14512	1
NM_002096	3	0.0067977	0.018163	0.900112	478	3	0.9932	0.99319	0.999731	23558	0
NM_001164106	3	0.0068007	0.018171	0.900112	479	3	0.9932	0.99319	0.999731	23557	0
NM_003925	3	0.0068339	0.018248	0.90063	480	3	0.9922	0.99221	0.999731	23533	0
NM_001114974	3	0.0068391	0.018257	0.90063	481	3	0.99316	0.99316	0.999731	23556	0
NM_018436	3	0.0069023	0.018433	0.90162	482	3	0.9931	0.99309	0.999731	23555	0
NM_004334	3	0.0069188	0.018477	0.90162	483	1	0.66146	0.66163	0.999731	15598	1
NM_002702	3	0.0069397	0.018529	0.90162	484	2	0.21256	0.32348	0.995378	7682	1
NM_133444	3	0.0069613	0.018581	0.90162	485	1	0.76448	0.76434	0.999731	17993	0
NM_198946	3	0.0069635	0.018586	0.90162	486	2	0.5904	0.5958	0.999731	14056	1
NM_001201459	3	0.0070038	0.018694	0.90162	487	1	0.56285	0.57217	0.999731	13516	1
NM_138769	3	0.0070073	0.018706	0.90162	488	2	0.85856	0.85854	0.999731	20211	0
NM_001037232	3	0.0070233	0.018748	0.90162	489	2	0.44212	0.47934	0.999731	11362	1
NM_152862	3	0.0070313	0.018768	0.90162	490	3	0.94026	0.94025	0.999731	22257	0
NM_001015881	3	0.0070331	0.018771	0.90162	491	3	0.99297	0.99297	0.999731	23554	0
NM_004314	3	0.0070353	0.018777	0.90162	492	3	0.93928	0.93925	0.999731	22228	0
NM_001278301	3	0.0070362	0.018779	0.90162	493	3	0.99296	0.99296	0.999731	23553	0
NM_001143919	3	0.0070463	0.018808	0.90162	494	1	0.4834	0.50957	0.999731	12051	1
NM_080625	3	0.0070472	0.018809	0.90162	495	3	0.99295	0.99295	0.999731	23552	0
NM_005182	3	0.0070739	0.018891	0.90367	496	3	0.99293	0.99292	0.999731	23551	0
NM_019062	3	0.0070887	0.018928	0.90367	497	2	0.22897	0.34315	0.995378	8143	1
NM_005084	3	0.0071154	0.018996	0.905116	498	2	0.67766	0.67785	0.999731	15993	0
NM_017802	3	0.0071312	0.019038	0.905286	499	2	0.59352	0.5986	0.999731	14125	1
NM_019118	3	0.0071718	0.019152	0.905477	500	3	0.9469	0.94693	0.999731	22412	0
NM_173502	3	0.0071735	0.019156	0.905477	501	3	0.99283	0.99282	0.999731	23550	0
NM_000275	3	0.0071737	0.019157	0.905477	502	2	0.33797	0.40933	0.995941	9751	1
NM_002154	3	0.0072162	0.019265	0.908775	503	2	0.8225	0.82254	0.999731	19364	0
NM_012244	3	0.0072371	0.01932	0.909296	504	3	0.99276	0.99276	0.999731	23549	0
NM_130899	3	0.0072586	0.019369	0.909296	505	2	0.7712	0.77119	0.999731	18162	0
NM_001113178	3	0.0072689	0.019391	0.909296	506	2	0.51015	0.52987	0.999731	12541	1
NM_001282680	3	0.0072892	0.01945	0.90934	507	3	0.99255	0.99255	0.999731	23544	0
NM_000639	3	0.0073011	0.019485	0.90934	508	2	0.9049	0.90486	0.999731	21395	0
NM_002908	3	0.0073436	0.019595	0.90934	509	3	0.92765	0.92775	0.999731	21933	0
NM_030649	3	0.0073495	0.01961	0.90934	510	3	0.99265	0.99265	0.999731	23548	0
NM_001206794	3	0.0073786	0.019686	0.90934	511	3	0.99262	0.99262	0.999731	23547	0
NM_016108	3	0.007386	0.019702	0.90934	512	1	0.20676	0.31595	0.995378	7506	1
NM_139030	3	0.0074207	0.019805	0.90934	513	3	0.99258	0.99258	0.999731	23546	0
NM_005647	3	0.007428	0.019828	0.90934	514	2	0.87999	0.87987	0.999731	20751	0
NM_014037	3	0.0074285	0.019828	0.90934	515	1	0.30682	0.38971	0.995378	9273	1
NM_001281445	3	0.0074304	0.019833	0.90934	516	3	0.99257	0.99257	0.999731	23545	0
NM_006141	3	0.0074609	0.019917	0.90934	517	2	0.038688	0.086442	0.977105	2078	1
NM_012318	3	0.0075134	0.020052	0.90934	518	1	0.31905	0.39737	0.995378	9451	1
NM_001103161	3	0.0075136	0.020053	0.90934	519	3	0.99249	0.99248	0.999731	23543	0
NM_001080493	3	0.0075309	0.020107	0.90934	520	3	0.92708	0.92717	0.999731	21917	0
NM_001256282	3	0.0075559	0.020187	0.90934	521	3	0.98272	0.9828	0.999731	23304	0
NM_052814	3	0.0075628	0.020204	0.90934	522	3	0.99244	0.99244	0.999731	23541	0
NM_001415	3	0.0075681	0.020218	0.90934	523	2	0.23008	0.34379	0.995378	8160	1
NM_145102	3	0.0075842	0.02026	0.90934	524	3	0.99242	0.99242	0.999731	23540	0
NM_080914	3	0.007593	0.02028	0.90934	525	2	0.78786	0.7878	0.999731	18567	0
NM_000595	3	0.0076057	0.020312	0.90934	526	3	0.99239	0.9924	0.999731	23539	0
NM_015932	3	0.0076139	0.020333	0.90934	527	3	0.99239	0.99239	0.999731	23538	0
NM_020442	3	0.0076404	0.020399	0.90934	528	3	0.99236	0.99235	0.999731	23537	0
NM_001665	3	0.0076408	0.0204	0.90934	529	3	0.95512	0.9553	0.999731	22606	0
NM_001130831	3	0.0076594	0.020447	0.90934	530	2	0.80467	0.80453	0.999731	18953	0
NM_183006	3	0.0076603	0.02045	0.90934	531	3	0.99234	0.99234	0.999731	23536	0
NM_002735	3	0.0076833	0.020512	0.90934	532	2	0.56359	0.57277	0.999731	13527	1
NM_024756	3	0.0077068	0.020577	0.90934	533	3	0.99229	0.99229	0.999731	23535	0
NM_020226	3	0.0077257	0.020623	0.90934	534	2	0.0071737	0.019261	0.894755	502	1
NM_001277207	3	0.0077452	0.020682	0.90934	535	3	0.99225	0.99226	0.999731	23534	0
NM_001260	3	0.0077682	0.02074	0.90934	536	2	0.83023	0.83027	0.999731	19543	0
NM_001195263	3	0.0078106	0.020859	0.90934	537	2	0.76378	0.76365	0.999731	17974	0
NM_003185	3	0.0078142	0.020869	0.90934	538	2	0.054274	0.10886	0.977105	2612	1
NM_001134233	3	0.0078352	0.020925	0.90934	539	2	0.77284	0.77284	0.999731	18196	0
NM_006386	3	0.0078374	0.020933	0.90934	540	3	0.99216	0.99218	0.999731	23532	0
NM_177965	3	0.0078394	0.02094	0.90934	541	2	0.88077	0.88064	0.999731	20771	0
NM_030962	3	0.0078425	0.020948	0.90934	542	3	0.99216	0.99217	0.999731	23531	0
NM_014462	3	0.0078436	0.020951	0.90934	543	3	0.98362	0.98372	0.999731	23326	0
NM_032298	3	0.0078531	0.020976	0.90934	544	3	0.96003	0.96022	0.999731	22731	0
NM_001277161	3	0.0078576	0.020991	0.90934	545	3	0.99214	0.99216	0.999731	23530	0
NM_001164440	3	0.0078593	0.020994	0.90934	546	3	0.99214	0.99215	0.999731	23529	0
NM_005348	3	0.0078943	0.021078	0.90934	547	3	0.9806	0.98074	0.999731	23253	0
NM_001142675	3	0.0078955	0.02108	0.90934	548	3	0.97196	0.97205	0.999731	23042	0
NM_001077494	3	0.0079069	0.021115	0.90934	549	2	0.56256	0.57193	0.999731	13509	1
NM_002958	3	0.0079281	0.021161	0.90934	550	2	0.86688	0.86693	0.999731	20424	0
NM_000092	3	0.007938	0.021183	0.90934	551	2	0.7195	0.71966	0.999731	16945	0
NM_133463	3	0.0079804	0.021294	0.90934	552	2	0.62574	0.62761	0.999731	14822	1
NM_001012967	3	0.0080002	0.021341	0.90934	553	3	0.992	0.99202	0.999731	23528	0
NM_133342	3	0.008007	0.021354	0.90934	554	3	0.99199	0.99202	0.999731	23527	0
NM_001003799	3	0.0080513	0.021472	0.90934	555	3	0.99122	0.99125	0.999731	23508	0
NM_004721	3	0.0080532	0.021476	0.90934	556	3	0.99195	0.99197	0.999731	23526	0
NM_001146157	3	0.0080641	0.021499	0.90934	557	2	0.87899	0.8789	0.999731	20724	0
NM_005966	3	0.0080653	0.021505	0.90934	558	2	0.61105	0.61425	0.999731	14498	1
NM_004291	3	0.0081068	0.021603	0.90934	559	2	0.85326	0.85323	0.999731	20096	0
NM_001172128	3	0.0081078	0.021605	0.90934	560	1	0.76997	0.76992	0.999731	18127	0
NM_001164317	3	0.0081082	0.021606	0.90934	561	3	0.99189	0.99191	0.999731	23525	0
NM_005956	3	0.0081151	0.021627	0.90934	562	3	0.99188	0.9919	0.999731	23524	0
NM_001024210	3	0.0081574	0.021732	0.90934	563	3	0.99184	0.99187	0.999731	23523	0
NM_001278616	3	0.0081927	0.021826	0.90934	564	1	0.7838	0.78373	0.999731	18463	0
NM_024050	3	0.0082012	0.021847	0.90934	565	2	0.71287	0.71305	0.999731	16788	0
NM_005493	3	0.008227	0.02191	0.90934	566	2	0.7312	0.73129	0.999731	17234	0
NM_173088	3	0.0082443	0.02195	0.90934	567	2	0.87773	0.87767	0.999731	20694	0
NM_003104	3	0.0082529	0.02197	0.90934	568	2	0.25234	0.35672	0.995378	8484	1
NM_001283024	3	0.0082659	0.022004	0.90934	569	3	0.99173	0.99177	0.999731	23521	0
NM_001252020	3	0.0082747	0.022025	0.90934	570	3	0.99173	0.99176	0.999731	23520	0
NM_030936	3	0.0082776	0.022031	0.90934	571	3	0.98727	0.98733	0.999731	23414	0
NM_001199779	3	0.0082817	0.022042	0.90934	572	3	0.99172	0.99176	0.999731	23519	0
NM_003986	3	0.0082887	0.022063	0.90934	573	3	0.99171	0.99175	0.999731	23518	0
NM_144563	3	0.00832	0.02213	0.90934	574	3	0.96648	0.96661	0.999731	22893	0
NM_013337	3	0.0083351	0.022169	0.90934	575	2	0.72783	0.72797	0.999731	17152	0
NM_017644	3	0.0083624	0.022244	0.90934	576	1	0.73214	0.7322	0.999731	17259	0
NM_020856	3	0.0083698	0.022257	0.90934	577	2	0.38325	0.43884	0.998945	10421	1
NM_002152	3	0.0083741	0.022272	0.90934	578	2	0.80657	0.80642	0.999731	18999	0
NM_001127219	2	0.0083965	0.022334	0.90934	579	2	0.9916	0.99165	0.999731	23517	0
NM_005055	3	0.0084049	0.022358	0.90934	580	2	0.29864	0.38466	0.995378	9155	1
NM_018235	3	0.0084394	0.02244	0.90934	581	3	0.9272	0.92729	0.999731	21919	0
NM_144669	3	0.0084473	0.022456	0.90934	582	1	0.16445	0.26032	0.995378	6153	1
NM_199320	3	0.0084482	0.022461	0.90934	583	2	0.53599	0.55014	0.999731	13008	1
NM_022146	3	0.0084656	0.022506	0.90934	584	2	0.47841	0.50586	0.999731	11964	1
NM_152716	3	0.0084897	0.022574	0.90934	585	1	0.17283	0.27145	0.995378	6418	1
NM_016016	3	0.0085138	0.022628	0.90934	586	2	0.11419	0.19261	0.995378	4580	1
NM_001134655	3	0.0085322	0.022678	0.90934	587	3	0.95093	0.95106	0.999731	22499	0
NM_207396	3	0.0085401	0.022694	0.90934	588	3	0.97723	0.97731	0.999731	23175	0
NM_001130043	3	0.0085518	0.022721	0.90934	589	3	0.99145	0.99149	0.999731	23516	0
NM_000443	3	0.0085536	0.022725	0.90934	590	3	0.99145	0.99148	0.999731	23515	0
NM_001142305	3	0.0085746	0.022773	0.90934	591	2	0.57904	0.58591	0.999731	13825	1
NM_022006	3	0.0085929	0.022815	0.90934	592	3	0.99141	0.99144	0.999731	23514	0
NM_020696	3	0.0085972	0.022833	0.90934	593	2	0.1899	0.29384	0.995378	6940	1
NM_002268	3	0.008606	0.022851	0.90934	594	2	0.83847	0.83855	0.999731	19737	0
NM_145008	3	0.0086104	0.022863	0.90934	595	2	0.77382	0.77381	0.999731	18230	0
NM_004383	3	0.0086108	0.022864	0.90934	596	3	0.99139	0.99142	0.999731	23513	0
NM_001483	3	0.008617	0.022879	0.90934	597	2	0.29086	0.3799	0.995378	9048	1
NM_020801	3	0.0086539	0.022983	0.910999	598	3	0.99135	0.99138	0.999731	23512	0
NM_001144013	3	0.0086595	0.022998	0.910999	599	2	0.54484	0.55734	0.999731	13170	1
NM_020142	3	0.0087019	0.023109	0.911294	600	2	0.77042	0.77037	0.999731	18140	0
NM_017458	3	0.0087026	0.023111	0.911294	601	3	0.9913	0.99133	0.999731	23511	0
NM_006471	3	0.0087062	0.02312	0.911294	602	3	0.99129	0.99133	0.999731	23510	0
NM_001282117	3	0.0087443	0.023217	0.912899	603	1	0.7394	0.73944	0.999731	17439	0
NM_152392	3	0.0087519	0.023238	0.912899	604	2	0.89603	0.89591	0.999731	21139	0
NM_002097	3	0.0087867	0.023323	0.914712	605	3	0.95436	0.95453	0.999731	22589	0
NM_005001	3	0.0088041	0.023367	0.914918	606	3	0.9912	0.99123	0.999731	23507	0
NM_001286380	3	0.0088292	0.023431	0.915939	607	1	0.48324	0.50944	0.999731	12047	1
NM_153206	3	0.0088716	0.023542	0.915963	609	3	0.99113	0.99117	0.999731	23506	0
NM_001127487	3	0.0088716	0.023542	0.915963	608	1	0.04896	0.1013	0.977105	2437	2
NM_203355	3	0.008881	0.023567	0.915963	610	2	0.048341	0.10042	0.977105	2415	1
NM_025234	3	0.008914	0.023653	0.915963	611	2	0.089597	0.15868	0.986653	3814	1
NM_001172775	3	0.0089156	0.023656	0.915963	612	3	0.99108	0.99112	0.999731	23505	0
NM_016121	3	0.0089258	0.023683	0.915963	613	3	0.98223	0.98233	0.999731	23297	0
NM_001278513	3	0.0089339	0.023702	0.915963	614	3	0.99107	0.9911	0.999731	23504	0
NM_198316	3	0.0089564	0.023767	0.916364	615	1	0.1058	0.18119	0.995378	4309	2
NM_001162435	3	0.0089652	0.02379	0.916364	616	3	0.99103	0.99107	0.999731	23503	0
NM_001098515	3	0.0090058	0.023894	0.918891	617	3	0.99099	0.99102	0.999731	23502	0
NM_001134479	3	0.0090413	0.023977	0.920592	618	2	0.90991	0.90988	0.999731	21522	0
NM_182641	3	0.0090837	0.024072	0.921455	619	2	0.64598	0.64664	0.999731	15232	1
NM_001113380	3	0.0091104	0.024145	0.921455	620	2	0.75867	0.75859	0.999731	17865	0
NM_001099642	3	0.0091301	0.024194	0.921455	621	3	0.99087	0.99091	0.999731	23501	0
NM_145276	3	0.0091685	0.024282	0.921455	622	3	0.95336	0.9535	0.999731	22564	0
NM_198321	3	0.0091875	0.024329	0.921455	623	2	0.21805	0.33056	0.995378	7832	1
NM_001199380	3	0.009192	0.024343	0.921455	624	2	0.56897	0.57741	0.999731	13623	1
NM_001130440	3	0.0092011	0.024363	0.921455	625	2	0.15933	0.25348	0.995378	6003	1
NM_001822	3	0.0092109	0.024391	0.921455	626	3	0.93984	0.93981	0.999731	22245	0
NM_001101662	3	0.0092481	0.024486	0.921455	627	3	0.99075	0.99079	0.999731	23500	0
NM_003580	3	0.0092534	0.024494	0.921455	628	2	0.60983	0.61315	0.999731	14471	1
NM_001291723	3	0.0092958	0.024594	0.921455	629	3	0.98399	0.98409	0.999731	23336	0
NM_006939	3	0.009338	0.024714	0.921455	630	2	0.4112	0.45782	0.999731	10846	1
NM_145235	3	0.0093382	0.024715	0.921455	631	2	0.81737	0.81736	0.999731	19245	0
NM_015317	3	0.0093481	0.024744	0.921455	632	3	0.99065	0.9907	0.999731	23499	0
NM_001172477	3	0.0093517	0.024751	0.921455	633	2	0.61256	0.6156	0.999731	14532	1
NM_015060	3	0.0093563	0.02476	0.921455	634	2	0.50799	0.52824	0.999731	12506	1
NM_152310	3	0.0093803	0.024819	0.921455	635	3	0.99062	0.99067	0.999731	23498	0
NM_001135954	3	0.0093806	0.02482	0.921455	636	1	0.47281	0.50178	0.999731	11859	1
NM_001009608	3	0.0094012	0.024879	0.921455	637	3	0.9906	0.99065	0.999731	23497	0
NM_021979	3	0.009423	0.024935	0.921455	638	1	0.4715	0.5008	0.999731	11838	1
NM_001206748	3	0.0094482	0.024998	0.921455	639	3	0.97666	0.97672	0.999731	23166	0
NM_016504	3	0.0094574	0.025021	0.921455	640	3	0.98813	0.98818	0.999731	23433	0
NM_182553	3	0.0094622	0.025031	0.921455	641	3	0.99054	0.99059	0.999731	23495	0
NM_001113378	3	0.0094654	0.02504	0.921455	642	3	0.97459	0.97466	0.999731	23113	0
NM_013252	3	0.0094851	0.025095	0.921455	643	3	0.95416	0.95431	0.999731	22582	0
NM_033348	3	0.009487	0.0251	0.921455	644	3	0.99051	0.99056	0.999731	23494	0
NM_001288623	3	0.0094908	0.025112	0.921455	645	3	0.99051	0.99056	0.999731	23493	0
NM_001195396	3	0.0094985	0.025129	0.921455	646	3	0.9905	0.99055	0.999731	23492	0
NM_007267	3	0.0095078	0.025153	0.921455	647	1	0.024444	0.061308	0.96905	1500	2
NM_012405	3	0.0095177	0.025172	0.921455	648	3	0.99048	0.99053	0.999731	23491	0
NM_004404	3	0.0095349	0.02521	0.921455	649	3	0.99047	0.99051	0.999731	23490	0
NM_021228	3	0.0095502	0.025242	0.921455	650	1	0.63237	0.63374	0.999731	14948	1
NM_001129885	3	0.0095914	0.025341	0.923659	651	3	0.92457	0.92465	0.999731	21869	0
NM_004507	3	0.0096157	0.0254	0.923752	652	3	0.99038	0.99043	0.999731	23489	0
NM_030641	3	0.0096235	0.025427	0.923752	653	3	0.99038	0.99042	0.999731	23488	0
NM_080664	3	0.009635	0.025461	0.923752	654	2	0.65703	0.65729	0.999731	15495	1
NM_024638	3	0.0096774	0.025576	0.925079	655	2	0.17227	0.27072	0.995378	6402	1
NM_001287506	3	0.0096815	0.02559	0.925079	656	3	0.99032	0.99036	0.999731	23487	0
NM_015852	3	0.0096912	0.025614	0.925079	657	3	0.99031	0.99035	0.999731	23486	0
NM_001113482	3	0.0097198	0.025689	0.926352	658	3	0.92141	0.92148	0.999731	21795	0
NM_006902	3	0.0097456	0.025759	0.927485	659	3	0.99025	0.9903	0.999731	23485	0
NM_016261	3	0.0097778	0.025843	0.928293	660	3	0.98348	0.98356	0.999731	23321	0
NM_001281300	3	0.0098046	0.02591	0.928293	661	1	0.14413	0.23321	0.995378	5528	2
NM_024680	3	0.0098081	0.025921	0.928293	662	3	0.99019	0.99024	0.999731	23484	0
NM_016339	3	0.0098434	0.026001	0.928293	663	2	0.24228	0.35081	0.995378	8332	1
NM_001142529	3	0.009847	0.026013	0.928293	664	1	0.52074	0.5381	0.999731	12724	1
NM_022780	3	0.0098492	0.026022	0.928293	665	3	0.99015	0.9902	0.999731	23483	0
NM_014112	3	0.0099093	0.026173	0.928293	666	2	0.89335	0.89323	0.999731	21068	0
NM_001080464	3	0.0099318	0.026229	0.928293	667	2	0.83515	0.83523	0.999731	19660	0
NM_002952	3	0.0099416	0.026252	0.928293	668	3	0.99006	0.9901	0.999731	23482	0
NM_032229	3	0.0099436	0.026257	0.928293	669	3	0.99006	0.9901	0.999731	23481	0
NM_001173462	3	0.0099742	0.026332	0.928293	670	3	0.94991	0.95005	0.999731	22470	0
NM_000193	3	0.0099753	0.026334	0.928293	671	3	0.94426	0.94427	0.999731	22360	0
NM_005302	3	0.0099801	0.026346	0.928293	672	2	0.52967	0.54515	0.999731	12902	1
NM_001005498	3	0.009995	0.02639	0.928293	673	3	0.99001	0.99004	0.999731	23480	0
NM_005337	3	0.010017	0.026448	0.928293	674	1	0.12037	0.20098	0.995378	4770	2
NM_031454	3	0.010023	0.026466	0.928293	675	2	0.45799	0.49076	0.999731	11606	1
NM_001173489	3	0.010025	0.026472	0.928293	676	3	0.98998	0.99001	0.999731	23479	0
NM_001163499	3	0.010033	0.026496	0.928293	677	3	0.98997	0.99001	0.999731	23478	0
NM_024652	3	0.010059	0.026562	0.928293	678	1	0.82682	0.82691	0.999731	19472	0
NM_002638	3	0.010092	0.026652	0.928293	679	3	0.98991	0.98995	0.999731	23476	0
NM_001290048	3	0.010101	0.026673	0.928293	680	1	0.49523	0.51847	0.999731	12285	1
NM_001167672	3	0.010136	0.026757	0.928293	681	3	0.98986	0.9899	0.999731	23475	0
NM_001143887	3	0.010144	0.026777	0.928293	682	1	0.73947	0.7395	0.999731	17440	0
NM_001926	3	0.010156	0.026804	0.928293	683	2	0.61432	0.6172	0.999731	14573	1
NM_030960	3	0.010162	0.026815	0.928293	684	3	0.98984	0.98988	0.999731	23474	0
NM_003353	3	0.010186	0.026875	0.928293	685	2	0.43091	0.47146	0.999731	11180	1
NM_182911	3	0.010227	0.026968	0.928293	686	2	0.18235	0.28403	0.995378	6728	1
NM_018143	3	0.010229	0.02697	0.928293	687	1	0.84927	0.84919	0.999731	19990	0
NM_006781	3	0.010232	0.026976	0.928293	689	3	0.98977	0.98981	0.999731	23473	0
NM_001278716	3	0.010232	0.026976	0.928293	688	2	0.86901	0.86906	0.999731	20476	0
NM_020414	3	0.010271	0.027071	0.928293	690	2	0.64642	0.64706	0.999731	15244	1
NM_019589	3	0.010284	0.027107	0.928293	691	3	0.98972	0.98977	0.999731	23472	0
NM_000692	3	0.010295	0.027131	0.928293	692	3	0.98971	0.98976	0.999731	23471	0
NM_001037735	3	0.010311	0.027172	0.928293	693	3	0.98969	0.98974	0.999731	23470	0
NM_182513	3	0.010313	0.027177	0.928293	694	2	0.57789	0.58495	0.999731	13799	1
NM_001010872	3	0.010319	0.02719	0.928293	695	3	0.98968	0.98974	0.999731	23469	0
NM_001111034	3	0.010339	0.027242	0.928737	696	3	0.98966	0.98972	0.999731	23468	0
NM_001127688	3	0.010356	0.027287	0.928925	697	2	0.75223	0.75211	0.999731	17717	0
NM_019850	3	0.010404	0.027399	0.931409	698	3	0.9896	0.98965	0.999731	23467	0
NM_003574	3	0.01044	0.027487	0.932327	699	1	0.16958	0.26714	0.995378	6312	2
NM_178562	3	0.010448	0.027505	0.932327	700	3	0.98955	0.9896	0.999731	23466	0
NM_001261411	3	0.010476	0.027573	0.933299	701	3	0.98952	0.98957	0.999731	23465	0
NM_004823	3	0.010496	0.027626	0.933761	702	3	0.9895	0.98955	0.999731	23464	0
NM_001242761	3	0.010525	0.027704	0.934062	703	2	0.39791	0.44868	0.999731	10648	1
NM_014749	3	0.010568	0.0278	0.934062	704	2	0.69111	0.69128	0.999731	16285	0
NM_001098213	3	0.010601	0.027881	0.934062	705	3	0.9894	0.98944	0.999731	23463	0
NM_153759	3	0.010607	0.027896	0.934062	706	3	0.98939	0.98943	0.999731	23462	0
NM_001284309	3	0.01061	0.027901	0.934062	707	2	0.32777	0.40284	0.995378	9591	1
NM_001130963	3	0.010634	0.027954	0.934062	708	3	0.98937	0.98941	0.999731	23461	0
NM_001242804	3	0.010652	0.027999	0.934062	709	2	0.73818	0.73824	0.999731	17408	0
NM_024319	3	0.010662	0.028025	0.934062	710	2	0.81675	0.81669	0.999731	19229	0
NM_138440	3	0.010667	0.028036	0.934062	711	3	0.94517	0.94519	0.999731	22379	0
NM_153334	3	0.010691	0.028097	0.934062	712	2	0.80212	0.80198	0.999731	18891	0
NM_052819	3	0.010695	0.028105	0.934062	713	2	0.46116	0.4931	0.999731	11661	1
NM_005406	3	0.010708	0.028145	0.934062	714	3	0.98929	0.98934	0.999731	23460	0
NM_024627	3	0.010737	0.028219	0.934062	715	1	0.7099	0.71008	0.999731	16708	0
NM_020248	3	0.01075	0.028258	0.934062	716	2	0.20358	0.31185	0.995378	7395	1
NM_032476	3	0.010763	0.028296	0.934062	717	3	0.98924	0.98929	0.999731	23459	0
NM_001195125	3	0.010779	0.028327	0.934062	718	3	0.95677	0.95694	0.999731	22644	0
NM_001174101	3	0.010822	0.028445	0.934062	719	1	0.71959	0.71974	0.999731	16948	0
NM_012319	3	0.010825	0.028454	0.934062	720	3	0.98918	0.98923	0.999731	23458	0
NM_005003	3	0.010831	0.02847	0.934062	721	3	0.98917	0.98922	0.999731	23457	0
NM_017926	3	0.010863	0.028541	0.934062	722	3	0.98914	0.98919	0.999731	23456	0
NM_032110	3	0.010898	0.028622	0.934062	723	3	0.9891	0.98915	0.999731	23455	0
NM_015340	3	0.010907	0.028641	0.934062	724	2	0.26746	0.36567	0.995378	8696	1
NM_001024213	3	0.010949	0.02875	0.934062	725	2	0.7314	0.73149	0.999731	17240	0
NM_006368	3	0.010976	0.028813	0.934062	726	3	0.96155	0.96174	0.999731	22772	0
NM_005313	3	0.010989	0.02885	0.934062	727	3	0.98901	0.98907	0.999731	23454	0
NM_001122964	3	0.010991	0.028859	0.934062	729	3	0.98575	0.98584	0.999731	23380	0
NM_022053	3	0.010991	0.028858	0.934062	728	2	0.10348	0.17802	0.994812	4244	1
NM_001126059	3	0.010999	0.028879	0.934062	730	3	0.989	0.98906	0.999731	23453	0
NM_001099271	3	0.011001	0.028885	0.934062	731	3	0.94323	0.94321	0.999731	22330	0
NM_001554	3	0.011006	0.028895	0.934062	732	3	0.96928	0.96942	0.999731	22986	0
NM_004779	3	0.011031	0.028959	0.934062	733	3	0.93263	0.93264	0.999731	22072	0
NM_024408	2	0.011056	0.029022	0.934062	734	2	0.98894	0.98899	0.999731	23452	0
NM_145115	3	0.011058	0.029031	0.934062	735	3	0.98894	0.98899	0.999731	23451	0
NM_014704	3	0.011061	0.029042	0.934062	736	3	0.97646	0.97652	0.999731	23157	0
NM_001146288	3	0.011076	0.029082	0.934062	737	2	0.66838	0.66851	0.999731	15766	1
NM_173209	3	0.01108	0.029094	0.934062	738	3	0.98892	0.98897	0.999731	23450	0
NM_015387	3	0.011086	0.029108	0.934062	739	3	0.98571	0.9858	0.999731	23378	0
NM_006938	3	0.011118	0.029195	0.934062	741	2	0.55352	0.56443	0.999731	13333	1
NM_015424	3	0.011118	0.029194	0.934062	740	3	0.98888	0.98893	0.999731	23449	0
NM_003565	3	0.011124	0.029209	0.934062	742	3	0.98888	0.98892	0.999731	23448	0
NM_006885	3	0.011143	0.029253	0.934204	743	3	0.98886	0.98891	0.999731	23447	0
NM_020132	3	0.011161	0.029296	0.934306	744	1	0.065741	0.12527	0.977105	3030	1
NM_001105193	3	0.01122	0.029449	0.934499	745	2	0.20373	0.31203	0.995378	7404	1
NM_024768	3	0.011245	0.029504	0.934499	747	2	0.094959	0.16625	0.987286	3995	1
NM_001195202	3	0.011245	0.029503	0.934499	746	2	0.86094	0.86094	0.999731	20272	0
NM_001135592	3	0.01129	0.029614	0.934499	748	2	0.74804	0.748	0.999731	17639	0
NM_001012427	3	0.01132	0.029697	0.934499	749	2	0.77311	0.7731	0.999731	18203	0
NM_173620	3	0.01133	0.029726	0.934499	750	2	0.61437	0.61724	0.999731	14575	1
NM_001278237	3	0.011347	0.029763	0.934499	751	3	0.98865	0.98869	0.999731	23446	0
NM_152342	3	0.011372	0.029826	0.934499	752	2	0.90181	0.90174	0.999731	21289	0
NM_032143	3	0.011376	0.029833	0.934499	753	3	0.98396	0.98406	0.999731	23334	0
NM_005900	3	0.011396	0.029881	0.934499	754	2	0.16706	0.26384	0.995378	6236	1
NM_018476	3	0.011415	0.02993	0.934499	755	3	0.94462	0.94463	0.999731	22367	0
NM_052906	3	0.011457	0.030039	0.934499	756	2	0.43194	0.47216	0.999731	11196	1
NM_021267	3	0.011474	0.030084	0.934499	757	3	0.98853	0.98856	0.999731	23445	0
NM_001271442	3	0.0115	0.030153	0.934499	758	2	0.29695	0.3836	0.995378	9128	1
NM_032549	3	0.011509	0.030173	0.934499	759	3	0.98849	0.98853	0.999731	23444	0
NM_022821	3	0.011542	0.030261	0.934499	760	3	0.98482	0.98492	0.999731	23359	0
NM_001001852	3	0.011544	0.030266	0.934499	761	3	0.98846	0.98849	0.999731	23443	0
NM_001135101	3	0.011584	0.030362	0.934499	762	2	0.90181	0.90174	0.999731	21309	0
NM_002221	3	0.011592	0.030379	0.934499	763	3	0.98841	0.98844	0.999731	23442	0
NM_015335	3	0.011612	0.030423	0.934499	764	3	0.98839	0.98842	0.999731	23441	0
NM_001177314	3	0.011627	0.030468	0.934499	765	3	0.97019	0.9703	0.999731	23005	0
NM_024642	3	0.011631	0.030478	0.934499	766	3	0.98837	0.98841	0.999731	23440	0
NM_001145998	3	0.011669	0.030566	0.934499	767	1	0.20893	0.31879	0.995378	7571	2
NM_032827	3	0.01171	0.030673	0.934499	768	2	0.53776	0.55154	0.999731	13041	1
NM_181446	3	0.011711	0.030675	0.934499	769	1	0.76461	0.76449	0.999731	17998	0
NM_001040455	3	0.011713	0.030679	0.934499	770	3	0.98829	0.98833	0.999731	23439	0
NM_138458	3	0.011754	0.030779	0.934499	771	2	0.24646	0.35326	0.995378	8394	1
NM_001261393	3	0.011766	0.030809	0.934499	772	2	0.90561	0.90557	0.999731	21409	0
NM_173511	3	0.011771	0.030824	0.934499	773	2	0.87995	0.87983	0.999731	20749	0
NM_001419	3	0.011772	0.030826	0.934499	774	3	0.98823	0.98827	0.999731	23438	0
NM_001694	3	0.011776	0.030835	0.934499	775	2	0.27441	0.36993	0.995378	8795	1
NM_003339	3	0.011796	0.030879	0.934499	776	2	0.67857	0.67879	0.999731	16015	0
NM_017589	3	0.011799	0.030889	0.934499	777	3	0.9882	0.98824	0.999731	23437	0
NM_152696	3	0.011833	0.030968	0.934499	778	3	0.9663	0.96643	0.999731	22890	0
NM_024419	3	0.011838	0.030985	0.934499	779	2	0.70639	0.70659	0.999731	16627	0
NM_152834	3	0.011853	0.031019	0.934499	780	2	0.090519	0.15996	0.986653	3845	1
NM_000925	3	0.011854	0.031023	0.934499	781	3	0.98815	0.98819	0.999731	23436	0
NM_001162384	3	0.011858	0.031036	0.934499	782	3	0.98783	0.98789	0.999731	23428	0
NM_052875	3	0.011861	0.031042	0.934499	783	3	0.98814	0.98819	0.999731	23435	0
NM_004335	3	0.011872	0.031068	0.934499	784	3	0.98813	0.98818	0.999731	23434	0
NM_002107	3	0.011879	0.031084	0.934499	785	3	0.98812	0.98817	0.999731	23432	0
NM_001018008	3	0.011879	0.031086	0.934499	786	2	0.096276	0.16809	0.990174	4028	1
NM_152788	3	0.011881	0.031093	0.934499	787	2	0.82585	0.82594	0.999731	19444	0
NM_001160037	3	0.011905	0.031152	0.934499	788	2	0.66635	0.6665	0.999731	15716	1
NM_139135	3	0.011914	0.031175	0.934499	789	3	0.98809	0.98814	0.999731	23431	0
NM_001102664	3	0.011919	0.03119	0.934499	790	3	0.98808	0.98814	0.999731	23430	0
NM_002256	3	0.011923	0.031198	0.934499	791	2	0.17208	0.27047	0.995378	6400	1
NM_001258437	3	0.011936	0.03123	0.934499	792	2	0.15182	0.2435	0.995378	5760	1
NM_003629	3	0.011987	0.03136	0.934499	793	2	0.048919	0.10124	0.977105	2436	1
NM_001080423	3	0.011988	0.031361	0.934499	794	3	0.98801	0.98807	0.999731	23429	0
NM_001190447	3	0.012008	0.031413	0.934499	795	3	0.95436	0.95453	0.999731	22588	0
NM_012474	3	0.012013	0.031424	0.934499	796	2	0.26892	0.36659	0.995378	8718	1
NM_025205	3	0.012028	0.031459	0.934499	797	2	0.06786	0.12828	0.977105	3109	1
NM_004034	3	0.01205	0.031513	0.934499	798	1	0.034567	0.080445	0.977105	1928	1
NM_176811	3	0.012092	0.031622	0.934499	799	1	0.12258	0.20404	0.995378	4836	2
NM_198963	3	0.012132	0.031727	0.934499	800	2	0.8014	0.8013	0.999731	18877	0
NM_004805	3	0.012135	0.031733	0.934499	801	2	0.35812	0.42232	0.996661	10045	1
NM_198578	3	0.012142	0.031747	0.934499	802	2	0.23709	0.34786	0.995378	8257	1
NM_001190965	3	0.012148	0.031759	0.934499	803	3	0.98431	0.98442	0.999731	23344	0
NM_016656	3	0.012177	0.031831	0.934499	804	2	0.68322	0.68343	0.999731	16105	0
NM_000057	3	0.012219	0.031928	0.934499	805	2	0.60633	0.61	0.999731	14397	1
NM_022137	3	0.012262	0.032025	0.934499	806	3	0.97	0.97012	0.999731	22998	0
NM_181727	3	0.012299	0.032115	0.934499	807	3	0.9877	0.98777	0.999731	23427	0
NM_000798	3	0.012304	0.032126	0.934499	808	1	0.086635	0.15463	0.986653	3716	2
NM_033055	3	0.012315	0.032151	0.934499	809	3	0.98769	0.98775	0.999731	23426	0
NM_199443	3	0.01233	0.032182	0.934499	810	2	0.039976	0.088345	0.977105	2125	1
NM_016564	3	0.012346	0.032228	0.934499	811	1	0.14711	0.23726	0.995378	5618	1
NM_001199303	3	0.012389	0.032337	0.934499	812	2	0.57261	0.58046	0.999731	13693	1
NM_022140	3	0.012419	0.032416	0.934499	813	2	0.49504	0.51833	0.999731	12281	1
NM_001039690	3	0.012431	0.032445	0.934499	814	2	0.55759	0.56781	0.999731	13404	1
NM_005861	3	0.012438	0.032463	0.934499	815	3	0.98756	0.98763	0.999731	23425	0
NM_002862	3	0.01244	0.032469	0.934499	816	2	0.66873	0.66884	0.999731	15775	1
NM_001015885	3	0.012454	0.0325	0.934499	817	3	0.98755	0.98762	0.999731	23424	0
NM_201570	3	0.012456	0.032503	0.934499	818	2	0.4529	0.48706	0.999731	11535	1
NM_001278622	3	0.012466	0.032524	0.934499	819	3	0.98753	0.98761	0.999731	23423	0
NM_152721	3	0.012471	0.032539	0.934499	820	3	0.96861	0.96878	0.999731	22963	0
NM_001042423	3	0.012473	0.032541	0.934499	821	3	0.96895	0.96911	0.999731	22978	0
NM_183235	3	0.012482	0.032561	0.934499	822	2	0.84199	0.84198	0.999731	19826	0
NM_033164	3	0.012502	0.032614	0.934499	823	3	0.9875	0.98756	0.999731	23422	0
NM_198568	3	0.012514	0.032641	0.934499	824	2	0.82489	0.82499	0.999731	19424	0
NM_001143958	3	0.012516	0.032645	0.934499	825	1	0.65523	0.65552	0.999731	15446	1
NM_001080509	3	0.012529	0.032682	0.934499	826	2	0.092721	0.16309	0.986653	3918	1
NM_018026	3	0.012532	0.032687	0.934499	827	3	0.98747	0.98753	0.999731	23421	0
NM_020765	3	0.01255	0.032733	0.934499	828	3	0.96743	0.96759	0.999731	22929	0
NM_001159700	3	0.012553	0.032738	0.934499	829	3	0.98745	0.98751	0.999731	23420	0
NM_001170881	3	0.01257	0.032786	0.934499	830	3	0.98743	0.98749	0.999731	23419	0
NM_020686	3	0.012593	0.032849	0.934499	831	3	0.93322	0.93322	0.999731	22090	0
NM_014626	3	0.012595	0.032854	0.934499	832	3	0.98741	0.98747	0.999731	23418	0
NM_003957	3	0.0126	0.032869	0.934499	833	2	0.9146	0.91466	0.999731	21637	0
NM_021947	3	0.012606	0.032886	0.934499	834	3	0.98739	0.98745	0.999731	23417	0
NM_022823	3	0.012642	0.032981	0.934499	835	1	0.69302	0.69321	0.999731	16327	0
NM_173496	3	0.012643	0.032984	0.934499	836	3	0.98736	0.98742	0.999731	23416	0
NM_001332	3	0.01265	0.033	0.934499	837	3	0.98735	0.98741	0.999731	23415	0
NM_004533	3	0.012685	0.033095	0.934499	838	1	0.079128	0.14415	0.984127	3474	2
NM_001752	3	0.012709	0.033158	0.934499	839	2	0.80085	0.80078	0.999731	18865	0
NM_000999	3	0.012727	0.033208	0.934499	840	2	0.46592	0.49663	0.999731	11746	1
NM_014801	3	0.012746	0.033257	0.934499	841	2	0.90181	0.90174	0.999731	21255	0
NM_001243797	3	0.012752	0.033268	0.934499	842	2	0.35353	0.41934	0.996661	9976	1
NM_001288962	3	0.012769	0.033316	0.934499	843	3	0.97327	0.97334	0.999731	23080	0
NM_015011	3	0.012773	0.033327	0.934499	844	2	0.40925	0.45648	0.999731	10819	1
NM_000384	3	0.012783	0.033357	0.934499	845	2	0.40189	0.45135	0.999731	10704	1
NM_007279	3	0.012812	0.033422	0.934499	846	1	0.2612	0.36197	0.995378	8608	1
NM_002765	3	0.012854	0.033523	0.934499	847	2	0.9183	0.91838	0.999731	21725	0
NM_016366	3	0.012876	0.03357	0.934499	848	3	0.98712	0.98719	0.999731	23413	0
NM_001282886	3	0.012896	0.033617	0.934499	849	1	0.39465	0.44649	0.999033	10602	1
NM_181657	3	0.012911	0.033658	0.934499	850	3	0.98709	0.98715	0.999731	23412	0
NM_003597	3	0.012943	0.033735	0.934499	851	2	0.29388	0.38178	0.995378	9089	1
NM_021135	3	0.012954	0.033762	0.934499	852	3	0.93204	0.93205	0.999731	22051	0
NM_003109	3	0.01297	0.033796	0.934499	854	2	0.20954	0.31959	0.995378	7586	1
NM_006558	3	0.01297	0.033796	0.934499	853	3	0.98703	0.9871	0.999731	23411	0
NM_001080521	3	0.012976	0.033808	0.934499	855	2	0.29847	0.38455	0.995378	9154	1
NM_178270	3	0.012981	0.033823	0.934499	856	2	0.1001	0.17334	0.993723	4136	1
NM_203389	3	0.012997	0.033863	0.934499	857	2	0.17752	0.27762	0.995378	6580	1
NM_006809	3	0.013013	0.033893	0.934499	858	2	0.63569	0.63687	0.999731	15023	1
NM_003116	3	0.013023	0.033916	0.934499	859	3	0.97221	0.9723	0.999731	23048	0
NM_001098537	3	0.013029	0.033933	0.934499	860	3	0.96589	0.96604	0.999731	22879	0
NM_001286681	3	0.013048	0.033979	0.934499	861	3	0.98695	0.98703	0.999731	23410	0
NM_153020	3	0.013057	0.034001	0.934499	862	3	0.98694	0.98702	0.999731	23409	0
NM_001207037	3	0.013066	0.034013	0.934499	863	2	0.19508	0.3007	0.995378	7111	1
NM_207391	3	0.013078	0.034039	0.934499	864	3	0.94077	0.94075	0.999731	22274	0
NM_182498	3	0.013088	0.034067	0.934499	865	2	0.40594	0.45417	0.999731	10767	1
NM_002010	3	0.013129	0.034152	0.935752	866	3	0.98687	0.98694	0.999731	23408	0
NM_000302	3	0.013223	0.034385	0.940474	867	3	0.98593	0.98602	0.999731	23387	0
NM_015305	3	0.013229	0.034404	0.940474	868	3	0.92388	0.92395	0.999731	21852	0
NM_030577	3	0.01325	0.034452	0.940702	869	3	0.98675	0.98681	0.999731	23407	0
NM_001077350	3	0.013277	0.034516	0.941362	870	2	0.85725	0.85718	0.999731	20173	0
NM_024066	3	0.013319	0.034628	0.942956	871	2	0.80919	0.80915	0.999731	19052	0
NM_005721	3	0.013339	0.034676	0.942956	872	3	0.98666	0.98671	0.999731	23405	0
NM_022805	3	0.013351	0.034705	0.942956	873	3	0.98665	0.9867	0.999731	23404	0
NM_033104	3	0.013362	0.034733	0.942956	874	2	0.46043	0.49255	0.999731	11648	1
NM_001136205	3	0.013391	0.034798	0.943437	875	2	0.42134	0.46483	0.999731	11016	1
NM_024742	3	0.013404	0.03483	0.943437	876	2	0.79945	0.79936	0.999731	18834	0
NM_003914	3	0.013446	0.03494	0.945341	877	2	0.81387	0.81382	0.999731	19166	0
NM_018489	3	0.01356	0.035216	0.951606	878	3	0.94089	0.94087	0.999731	22281	0
NM_201274	3	0.013573	0.035252	0.951606	879	1	0.027714	0.068905	0.975694	1673	2
NM_001164405	3	0.013646	0.035429	0.951606	880	3	0.98635	0.98642	0.999731	23402	0
NM_001173452	3	0.013658	0.035462	0.951606	881	2	0.45441	0.48815	0.999731	11554	1
NM_024558	3	0.013681	0.035523	0.951606	882	2	0.80552	0.80536	0.999731	18968	0
NM_013242	3	0.013687	0.035538	0.951606	883	3	0.98631	0.98637	0.999731	23400	0
NM_001098668	3	0.0137	0.035573	0.951606	884	2	0.87064	0.8707	0.999731	20519	0
NM_001104925	3	0.013708	0.035594	0.951606	885	3	0.92901	0.92908	0.999731	21980	0
NM_016170	3	0.013742	0.035691	0.951606	886	1	0.13605	0.22227	0.995378	5280	1
NM_020683	3	0.013785	0.035795	0.951606	887	1	0.19602	0.30194	0.995378	7142	2
NM_003115	3	0.013827	0.035899	0.951606	888	1	0.59939	0.60374	0.999731	14252	1
NM_030789	3	0.013829	0.035906	0.951606	889	3	0.98617	0.98625	0.999731	23399	0
NM_000325	3	0.013841	0.035934	0.951606	890	2	0.57931	0.58615	0.999731	13830	1
NM_152760	3	0.013866	0.035995	0.951606	891	3	0.98613	0.98622	0.999731	23398	0
NM_016603	3	0.013869	0.036004	0.951606	893	2	0.84648	0.84645	0.999731	19927	0
NM_178171	3	0.013869	0.036002	0.951606	892	3	0.98613	0.98622	0.999731	23397	0
NM_001242826	3	0.013879	0.036036	0.951606	894	3	0.98612	0.9862	0.999731	23396	0
NM_001146702	3	0.013885	0.036049	0.951606	895	3	0.93994	0.93991	0.999731	22251	0
NM_006588	3	0.013929	0.03617	0.951606	896	2	0.63373	0.63502	0.999731	14978	1
NM_170600	3	0.01394	0.036197	0.951606	897	3	0.98606	0.98614	0.999731	23394	0
NM_014714	3	0.013954	0.036232	0.951606	898	2	0.73435	0.73441	0.999731	17301	0
NM_194435	3	0.013957	0.036241	0.951606	899	2	0.82441	0.8245	0.999731	19411	0
NM_012341	3	0.013987	0.036312	0.951606	900	3	0.98601	0.98609	0.999731	23392	0
NM_174911	3	0.013996	0.036332	0.951606	901	1	0.39453	0.44639	0.999033	10600	1
NM_080622	3	0.014002	0.036347	0.951606	902	3	0.986	0.98608	0.999731	23391	0
NM_001037553	3	0.014007	0.036362	0.951606	903	3	0.98599	0.98608	0.999731	23390	0
NM_014676	3	0.014027	0.036412	0.951606	904	3	0.98597	0.98606	0.999731	23389	0
NM_005119	3	0.014035	0.036432	0.951606	905	2	0.81397	0.81392	0.999731	19167	0
NM_001172698	3	0.014038	0.036437	0.951606	906	1	0.14825	0.23881	0.995378	5648	2
NM_020928	3	0.014052	0.036467	0.951606	907	3	0.98595	0.98604	0.999731	23388	0
NM_032860	3	0.014081	0.036541	0.951606	908	2	0.16729	0.26414	0.995378	6245	1
NM_001167738	3	0.014104	0.036606	0.951606	909	3	0.9859	0.98599	0.999731	23386	0
NM_213590	3	0.014109	0.036617	0.951606	910	3	0.98589	0.98598	0.999731	23385	0
NM_134261	3	0.014123	0.036651	0.951606	911	2	0.70739	0.70757	0.999731	16653	0
NM_001005204	3	0.014127	0.03666	0.951606	912	3	0.98587	0.98596	0.999731	23383	0
NM_024097	3	0.014129	0.036667	0.951606	913	2	0.09124	0.16096	0.986653	3866	1
NM_003092	3	0.014165	0.036756	0.951606	914	3	0.96691	0.96704	0.999731	22907	0
NM_001080484	3	0.014172	0.036773	0.951606	915	3	0.98583	0.98592	0.999731	23382	0
NM_001142782	3	0.01418	0.036792	0.951606	916	2	0.65036	0.65081	0.999731	15339	1
NM_003213	3	0.014207	0.036861	0.951606	917	1	0.7799	0.77987	0.999731	18380	0
NM_021096	3	0.014219	0.036894	0.951606	918	2	0.57205	0.57997	0.999731	13678	1
NM_207343	3	0.014222	0.036901	0.951606	919	3	0.98578	0.98587	0.999731	23381	0
NM_001271958	3	0.014224	0.036905	0.951606	920	2	0.63123	0.63268	0.999731	14928	1
NM_018051	3	0.01425	0.036967	0.951606	921	1	0.55606	0.56655	0.999731	13375	1
NM_002015	3	0.014252	0.036977	0.951606	922	3	0.98575	0.98584	0.999731	23379	0
NM_002759	3	0.014292	0.037089	0.951746	923	1	0.49013	0.51465	0.999731	12179	1
NM_018838	3	0.014334	0.037201	0.951746	924	2	0.67498	0.67516	0.999731	15928	0
NM_004650	3	0.014419	0.03742	0.951746	925	2	0.82034	0.8204	0.999731	19312	0
NM_001277163	3	0.014426	0.037439	0.951746	926	3	0.94615	0.94616	0.999731	22399	0
NM_001128930	3	0.014451	0.037503	0.951746	927	3	0.98555	0.98564	0.999731	23377	0
NM_177951	3	0.01446	0.037523	0.951746	928	3	0.94105	0.94099	0.999731	22291	0
NM_005779	3	0.014461	0.037524	0.951746	929	1	0.24391	0.35178	0.995378	8359	1
NM_183422	3	0.014527	0.037691	0.951746	930	3	0.98547	0.98556	0.999731	23376	0
NM_001144950	3	0.014529	0.037696	0.951746	931	3	0.98547	0.98556	0.999731	23375	0
NM_001171940	3	0.014545	0.037732	0.951746	932	1	0.26162	0.36222	0.995378	8612	1
NM_001012968	3	0.01457	0.037788	0.951746	933	3	0.98543	0.98552	0.999731	23374	0
NM_001145155	3	0.014573	0.037794	0.951746	934	3	0.96787	0.96803	0.999731	22942	0
NM_006556	3	0.014624	0.037914	0.951746	935	3	0.98538	0.98547	0.999731	23373	0
NM_001846	3	0.01463	0.037925	0.951746	937	2	0.81015	0.81008	0.999731	19071	0
NM_001278942	3	0.01463	0.037925	0.951746	936	2	0.45318	0.48727	0.999731	11538	1
NM_024800	3	0.014631	0.037928	0.951746	938	3	0.98537	0.98546	0.999731	23372	0
NM_001159	3	0.014658	0.037991	0.951746	939	2	0.86057	0.86057	0.999731	20261	0
NM_025041	3	0.01467	0.038022	0.951746	940	2	0.3206	0.39831	0.995378	9476	1
NM_001136196	3	0.014672	0.038029	0.951746	941	3	0.94172	0.94165	0.999731	22307	0
NM_022132	3	0.014695	0.038091	0.951746	942	3	0.9853	0.9854	0.999731	23371	0
NM_001039492	3	0.014729	0.038177	0.951746	943	3	0.98527	0.98537	0.999731	23370	0
NM_001137550	3	0.014743	0.038213	0.951746	944	2	0.87885	0.87875	0.999731	20720	0
NM_001146103	3	0.014757	0.038243	0.951746	945	3	0.98524	0.98535	0.999731	23369	0
NM_033642	3	0.014757	0.038243	0.951746	946	2	0.8181	0.81807	0.999731	19259	0
NM_018337	3	0.014759	0.038249	0.951746	947	3	0.98524	0.98535	0.999731	23368	0
NM_001145413	3	0.014783	0.038307	0.951746	948	2	0.29988	0.38543	0.995378	9170	1
NM_206914	3	0.0148	0.038347	0.951746	949	2	0.76998	0.76994	0.999731	18128	0
NM_005497	3	0.014846	0.038454	0.951746	950	2	0.21602	0.32795	0.995378	7771	1
NM_004447	3	0.014863	0.038491	0.951746	951	2	0.89783	0.89774	0.999731	21195	0
NM_015725	3	0.014884	0.038533	0.951746	952	3	0.94211	0.94206	0.999731	22313	0
NM_178310	3	0.014893	0.038553	0.951746	953	3	0.98511	0.98522	0.999731	23365	0
NM_001034172	3	0.014915	0.038599	0.951746	954	2	0.44866	0.48399	0.999731	11472	1
NM_001102398	3	0.014926	0.038627	0.951746	955	3	0.92174	0.92182	0.999731	21799	0
NM_014979	3	0.014926	0.038629	0.951746	956	2	0.76022	0.76011	0.999731	17904	0
NM_001012614	3	0.014929	0.038638	0.951746	957	3	0.98507	0.98518	0.999731	23364	0
NM_178128	3	0.014932	0.038646	0.951746	958	3	0.97415	0.97422	0.999731	23103	0
NM_199341	3	0.014949	0.038688	0.951746	959	2	0.21191	0.32265	0.995378	7663	1
NM_014653	3	0.014963	0.03873	0.951746	960	3	0.98504	0.98515	0.999731	23363	0
NM_000937	3	0.014968	0.03874	0.951746	961	2	0.59506	0.59997	0.999731	14161	1
NM_005188	3	0.014981	0.038768	0.951746	962	3	0.98502	0.98513	0.999731	23362	0
NM_152699	3	0.01501	0.038838	0.951746	963	2	0.25115	0.35602	0.995378	8467	1
NM_030915	3	0.015053	0.038946	0.951746	964	1	0.38291	0.4386	0.998945	10416	1
NM_080491	3	0.015095	0.039055	0.951746	965	2	0.81557	0.81547	0.999731	19201	0
NM_001285402	2	0.015111	0.039095	0.951746	966	2	0.98489	0.985	0.999731	23361	0
NM_001002914	3	0.015137	0.039155	0.951746	967	1	0.014841	0.038437	0.922274	985	1
NM_176797	3	0.015148	0.039179	0.951746	968	3	0.98485	0.98496	0.999731	23360	0
NM_030572	3	0.015156	0.03919	0.951746	969	2	0.79888	0.7988	0.999731	18820	0
NM_175721	3	0.015179	0.039253	0.951746	970	3	0.96817	0.96834	0.999731	22953	0
NM_005005	3	0.015198	0.039296	0.951746	971	3	0.9848	0.98491	0.999731	23358	0
NM_001025266	3	0.015221	0.039348	0.951746	972	1	0.043502	0.093441	0.977105	2244	2
NM_001265592	3	0.015258	0.039436	0.951746	973	3	0.98474	0.98485	0.999731	23357	0
NM_001256478	3	0.015264	0.039449	0.951746	974	3	0.9392	0.93917	0.999731	22226	0
NM_020679	3	0.015266	0.039456	0.951746	975	3	0.95044	0.95056	0.999731	22489	0
NM_024628	3	0.015306	0.039549	0.951746	976	1	0.39913	0.44952	0.999731	10662	1
NM_139021	3	0.015312	0.039566	0.951746	977	2	0.62775	0.62948	0.999731	14864	1
NM_014443	3	0.015329	0.039605	0.951746	978	3	0.98467	0.98479	0.999731	23356	0
NM_002399	3	0.015348	0.039657	0.951746	979	1	0.17545	0.27493	0.995378	6506	2
NM_182724	3	0.015355	0.039677	0.951746	980	3	0.98464	0.98475	0.999731	23355	0
NM_001136498	3	0.01536	0.039693	0.951746	981	3	0.98464	0.98475	0.999731	23354	0
NM_001258016	3	0.015379	0.039742	0.951746	982	3	0.98462	0.98473	0.999731	23352	0
NM_001145156	3	0.01539	0.039772	0.951746	983	1	0.26026	0.36143	0.995378	8593	1
NM_181608	3	0.015399	0.039791	0.951746	984	2	0.72553	0.72567	0.999731	17101	0
NM_001134336	3	0.015411	0.039813	0.951746	985	3	0.98459	0.9847	0.999731	23351	0
NM_003534	3	0.015421	0.039838	0.951746	986	3	0.98458	0.98469	0.999731	23350	0
NM_001127323	3	0.015433	0.039868	0.951746	987	3	0.96911	0.96927	0.999731	22983	0
NM_213647	3	0.015469	0.039957	0.951746	988	2	0.90181	0.90174	0.999731	21345	0
NM_144992	3	0.015481	0.039988	0.951746	989	3	0.95671	0.95689	0.999731	22642	0
NM_001085382	3	0.015517	0.040079	0.951746	990	2	0.79967	0.79957	0.999731	18837	0
NM_002873	3	0.015519	0.040083	0.951746	991	3	0.98448	0.98459	0.999731	23349	0
NM_001199107	3	0.015545	0.04014	0.951746	992	3	0.93227	0.93228	0.999731	22061	0
NM_004430	3	0.015574	0.040209	0.951746	993	3	0.95128	0.95141	0.999731	22509	0
NM_024108	3	0.015597	0.040264	0.951746	994	3	0.9538	0.95395	0.999731	22572	0
NM_001244734	3	0.015602	0.040275	0.951746	995	2	0.91915	0.9192	0.999731	21744	0
NM_016331	3	0.015603	0.040278	0.951746	997	2	0.57067	0.57883	0.999731	13657	1
NM_198486	3	0.015603	0.040277	0.951746	996	3	0.9844	0.98451	0.999731	23348	0
NM_015944	3	0.015644	0.040388	0.951746	998	1	0.57099	0.57908	0.999731	13662	1
NM_001037813	3	0.015666	0.040447	0.951746	999	3	0.98433	0.98445	0.999731	23347	0
NM_015889	3	0.015676	0.040473	0.951746	1000	3	0.98432	0.98444	0.999731	23346	0
NM_145905	3	0.015682	0.040488	0.951746	1001	3	0.98432	0.98443	0.999731	23345	0
NM_001135575	3	0.015728	0.0406	0.951746	1002	3	0.95028	0.95041	0.999731	22484	0
NM_001443	3	0.015744	0.040635	0.951746	1003	2	0.70579	0.70598	0.999731	16616	0
NM_021943	3	0.015771	0.040705	0.951746	1004	2	0.67415	0.67433	0.999731	15905	0
NM_021182	3	0.015785	0.040738	0.951746	1005	3	0.93501	0.93501	0.999731	22131	0
NM_018656	3	0.015813	0.040809	0.951746	1006	1	0.43673	0.47552	0.999731	11266	1
NM_017878	3	0.015837	0.040876	0.951746	1007	3	0.98416	0.98428	0.999731	23343	0
NM_001136239	3	0.015855	0.040917	0.951746	1008	2	0.27916	0.37278	0.995378	8864	1
NM_001197296	3	0.015856	0.040919	0.951746	1009	3	0.98414	0.98425	0.999731	23342	0
NM_006011	3	0.015878	0.040973	0.951746	1010	3	0.98412	0.98423	0.999731	23341	0
NM_001039548	3	0.01588	0.040977	0.951746	1011	3	0.98412	0.98422	0.999731	23340	0
NM_001160130	3	0.015885	0.040992	0.951746	1012	3	0.97381	0.97388	0.999731	23090	0
NM_152618	3	0.015897	0.04102	0.951746	1013	1	0.36778	0.42862	0.996733	10202	1
NM_020829	3	0.015907	0.041045	0.951746	1014	3	0.98409	0.9842	0.999731	23339	0
NM_031434	3	0.01591	0.041053	0.951746	1015	3	0.98409	0.9842	0.999731	23338	0
NM_007147	3	0.015932	0.041108	0.951746	1016	2	0.78275	0.7827	0.999731	18436	0
NM_001145080	3	0.015939	0.041128	0.951746	1017	2	0.82319	0.82323	0.999731	19383	0
NM_006716	3	0.015968	0.041208	0.951746	1018	3	0.92789	0.92799	0.999731	21945	0
NM_199135	3	0.015973	0.041224	0.951746	1019	3	0.9349	0.9349	0.999731	22128	0
NM_002827	3	0.015982	0.041246	0.951746	1020	2	0.76831	0.76826	0.999731	18078	0
NM_144732	3	0.01601	0.041325	0.951746	1021	3	0.98399	0.98409	0.999731	23337	0
NM_017417	3	0.016018	0.041342	0.951746	1022	3	0.98398	0.98408	0.999731	23335	0
NM_007365	3	0.016024	0.041357	0.951746	1023	2	0.74961	0.74954	0.999731	17670	0
NM_018945	3	0.016056	0.041449	0.951746	1025	3	0.98394	0.98405	0.999731	23333	0
NM_144593	3	0.016056	0.041449	0.951746	1024	3	0.94061	0.94059	0.999731	22268	0
NM_015041	3	0.016066	0.041474	0.951746	1026	1	0.16362	0.25921	0.995378	6133	1
NM_001002923	3	0.016108	0.04158	0.951746	1027	2	0.32449	0.40077	0.995378	9538	1
NM_052885	3	0.016116	0.0416	0.951746	1028	3	0.97717	0.97724	0.999731	23173	0
NM_001242377	3	0.016127	0.041628	0.951746	1029	3	0.98174	0.98186	0.999731	23287	0
NM_031950	3	0.016135	0.041644	0.951746	1030	3	0.98386	0.98398	0.999731	23332	0
NM_001037442	3	0.016143	0.041664	0.951746	1031	3	0.98386	0.98397	0.999731	23331	0
NM_017879	3	0.016151	0.041683	0.951746	1032	1	0.20355	0.31181	0.995378	7394	2
NM_001195057	3	0.016152	0.041684	0.951746	1033	3	0.98385	0.98397	0.999731	23330	0
NM_003954	3	0.016157	0.041699	0.951746	1034	2	0.8213	0.82137	0.999731	19338	0
NM_001277818	3	0.016163	0.041714	0.951746	1035	2	0.051311	0.10465	0.977105	2520	1
NM_005796	3	0.016193	0.041791	0.951746	1036	2	0.67916	0.67938	0.999731	16029	0
NM_032784	3	0.016205	0.041816	0.951746	1037	2	0.70564	0.70582	0.999731	16610	0
NM_006555	3	0.016235	0.041887	0.951746	1038	1	0.19053	0.29467	0.995378	6966	2
NM_133343	3	0.016242	0.041905	0.951746	1039	3	0.98376	0.98387	0.999731	23329	0
NM_018256	1	0.016252	0.041931	0.951746	1040	1	0.98375	0.98386	0.999731	23328	0
NM_001204353	3	0.016277	0.041987	0.951746	1041	1	0.77398	0.77396	0.999731	18234	0
NM_173217	3	0.016297	0.042038	0.951746	1042	3	0.9837	0.98381	0.999731	23327	0
NM_005398	3	0.016319	0.042091	0.951746	1043	1	0.74256	0.74257	0.999731	17518	0
NM_001136032	3	0.016324	0.042104	0.951746	1044	2	0.54967	0.56124	0.999731	13259	1
NM_001113525	3	0.016362	0.042203	0.951746	1045	1	0.11853	0.1985	0.995378	4714	2
NM_001206878	3	0.016393	0.042275	0.951746	1046	3	0.98361	0.98371	0.999731	23325	0
NM_001193460	3	0.016404	0.042305	0.951746	1047	1	0.84376	0.84375	0.999731	19868	0
NM_152562	3	0.016446	0.042419	0.951746	1048	1	0.52522	0.54165	0.999731	12820	1
NM_001010940	3	0.016464	0.04246	0.951746	1049	3	0.98354	0.98363	0.999731	23324	0
NM_203425	3	0.016467	0.042467	0.951746	1050	3	0.98353	0.98363	0.999731	23323	0
NM_002337	3	0.016473	0.042477	0.951746	1051	3	0.98353	0.98362	0.999731	23322	0
NM_003249	3	0.016488	0.042514	0.951746	1052	2	0.54509	0.55754	0.999731	13175	1
NM_033036	3	0.01651	0.042566	0.951746	1053	3	0.96487	0.965	0.999731	22852	0
NM_005509	3	0.01653	0.042616	0.951746	1054	2	0.34359	0.41294	0.996152	9836	1
NM_005448	3	0.016572	0.042714	0.951746	1055	3	0.98343	0.98351	0.999731	23320	0
NM_001285448	3	0.016573	0.042714	0.951746	1056	2	0.22947	0.34343	0.995378	8149	1
NM_004965	3	0.016583	0.042744	0.951746	1057	3	0.98342	0.9835	0.999731	23319	0
NM_001142281	3	0.016588	0.042755	0.951746	1058	2	0.80849	0.80844	0.999731	19039	0
NM_019089	3	0.016615	0.042819	0.951746	1059	2	0.53885	0.55246	0.999731	13068	1
NM_032182	3	0.016657	0.042907	0.951746	1060	1	0.33335	0.40641	0.995378	9679	1
NM_015525	3	0.016664	0.04293	0.951746	1061	3	0.98334	0.98342	0.999731	23318	0
NM_032955	3	0.016678	0.042966	0.951746	1062	2	0.6745	0.67469	0.999731	15915	0
NM_006110	3	0.016699	0.04302	0.951746	1063	2	0.47733	0.50506	0.999731	11941	1
NM_022034	3	0.016702	0.043025	0.951746	1064	3	0.98169	0.98182	0.999731	23285	0
NM_001288736	3	0.016706	0.043035	0.951746	1065	3	0.98329	0.98338	0.999731	23317	0
NM_004147	3	0.016709	0.043045	0.951746	1066	3	0.98329	0.98338	0.999731	23316	0
NM_001082486	3	0.016726	0.043092	0.951746	1067	2	0.42101	0.46461	0.999731	11011	1
NM_001288715	3	0.016734	0.043107	0.951746	1068	3	0.98327	0.98336	0.999731	23315	0
NM_001018078	3	0.016739	0.043121	0.951746	1069	3	0.98326	0.98335	0.999731	23314	0
NM_024831	3	0.016741	0.043126	0.951746	1070	2	0.099781	0.17289	0.993723	4125	1
NM_005206	3	0.016745	0.043133	0.951746	1071	2	0.30408	0.38803	0.995378	9234	1
NM_145036	3	0.016749	0.043142	0.951746	1072	3	0.98325	0.98334	0.999731	23313	0
NM_198566	3	0.01678	0.043217	0.951746	1073	3	0.98322	0.98331	0.999731	23312	0
NM_001105565	3	0.016784	0.043226	0.951746	1074	2	0.53742	0.55128	0.999731	13038	1
NM_001167740	3	0.016826	0.043322	0.951746	1075	1	0.15221	0.24401	0.995378	5772	2
NM_001127453	3	0.016841	0.04336	0.951746	1076	3	0.95877	0.95896	0.999731	22698	0
NM_207511	3	0.016868	0.043427	0.951746	1077	3	0.97857	0.97868	0.999731	23207	0
NM_018238	3	0.016896	0.04349	0.951746	1078	2	0.61407	0.61698	0.999731	14569	1
NM_198928	3	0.016905	0.043509	0.951746	1079	3	0.9831	0.98318	0.999731	23311	0
NM_001282189	3	0.01691	0.04352	0.951746	1080	1	0.36334	0.42568	0.996661	10129	1
NM_173348	3	0.016927	0.043559	0.951746	1081	3	0.98307	0.98316	0.999731	23310	0
NM_006166	3	0.016951	0.043612	0.951746	1082	2	0.75787	0.75779	0.999731	17843	0
NM_053279	3	0.016952	0.043617	0.951746	1083	2	0.60757	0.61113	0.999731	14420	1
NM_001166292	3	0.017023	0.043794	0.951746	1084	3	0.98298	0.98306	0.999731	23309	0
NM_001286997	3	0.01703	0.043811	0.951746	1085	2	0.26075	0.3617	0.995378	8601	1
NM_001285486	3	0.017037	0.043829	0.951746	1086	2	0.60532	0.60907	0.999731	14378	1
NM_001282387	3	0.017042	0.043839	0.951746	1087	2	0.91915	0.9192	0.999731	21743	0
NM_001282884	3	0.017054	0.04387	0.951746	1088	3	0.96656	0.96669	0.999731	22895	0
NM_174959	3	0.017079	0.043921	0.951746	1089	3	0.97222	0.97231	0.999731	23049	0
NM_014989	3	0.017091	0.043958	0.951746	1090	3	0.98291	0.98299	0.999731	23307	0
NM_006986	3	0.017121	0.044036	0.951746	1091	2	0.74418	0.74419	0.999731	17554	0
NM_058163	3	0.017133	0.044066	0.951746	1092	2	0.46257	0.49416	0.999731	11687	1
NM_001859	3	0.017145	0.044091	0.951746	1093	3	0.98286	0.98294	0.999731	23306	0
NM_001282856	3	0.017156	0.044117	0.951746	1094	3	0.98284	0.98292	0.999731	23305	0
NM_001017437	3	0.017182	0.044181	0.951746	1095	3	0.9199	0.91998	0.999731	21761	0
NM_022894	3	0.017195	0.044209	0.951746	1096	2	0.81844	0.81841	0.999731	19268	0
NM_030895	3	0.017206	0.044234	0.951746	1097	2	0.68481	0.685	0.999731	16150	0
NM_022717	3	0.017237	0.044311	0.951746	1098	2	0.78833	0.78827	0.999731	18576	0
NM_001098813	3	0.017248	0.044333	0.951746	1099	2	0.24536	0.35261	0.995378	8379	1
NM_019012	3	0.017299	0.044462	0.951746	1100	3	0.95279	0.95292	0.999731	22548	0
NM_174910	3	0.017332	0.044535	0.951746	1101	2	0.32317	0.39994	0.995378	9514	1
NM_147127	3	0.01736	0.044609	0.951746	1102	2	0.48707	0.51228	0.999731	12120	1
NM_016475	3	0.017366	0.044623	0.951746	1103	2	0.83867	0.83875	0.999731	19742	0
NM_005561	3	0.017374	0.044643	0.951746	1104	2	0.73851	0.73857	0.999731	17417	0
NM_001242939	3	0.017391	0.044679	0.951746	1105	2	0.49092	0.51524	0.999731	12192	1
NM_001243942	3	0.017397	0.044691	0.951746	1106	3	0.95128	0.95141	0.999731	22505	0
NM_002661	3	0.017428	0.044774	0.951746	1107	3	0.97793	0.97801	0.999731	23192	0
NM_001012659	3	0.01744	0.044802	0.951746	1108	2	0.83151	0.83152	0.999731	19569	0
NM_016734	3	0.017459	0.044852	0.951746	1109	2	0.02415	0.060635	0.966894	1488	1
NM_052940	3	0.017459	0.044853	0.951746	1110	3	0.98254	0.98263	0.999731	23303	0
NM_001507	3	0.017501	0.044945	0.951746	1111	3	0.9706	0.97071	0.999731	23017	0
NM_024789	3	0.017528	0.045004	0.951746	1112	3	0.98247	0.98256	0.999731	23302	0
NM_024122	3	0.017533	0.045017	0.951746	1113	3	0.97743	0.97751	0.999731	23180	0
NM_001037281	3	0.017543	0.045045	0.951746	1114	1	0.82273	0.82277	0.999731	19373	0
NM_017829	3	0.017571	0.045111	0.951746	1115	3	0.98243	0.98252	0.999731	23301	0
NM_007225	3	0.017619	0.045219	0.951746	1116	3	0.97432	0.97439	0.999731	23106	0
NM_001135181	3	0.017626	0.045233	0.951746	1117	2	0.05411	0.10863	0.977105	2606	1
NM_001001487	3	0.017632	0.045247	0.951746	1118	2	0.87481	0.8748	0.999731	20619	0
NM_015288	3	0.017649	0.045295	0.951746	1119	3	0.98235	0.98244	0.999731	23299	0
NM_001136233	1	0.017661	0.045325	0.951746	1120	1	0.98234	0.98243	0.999731	23298	0
NM_006402	3	0.017669	0.04534	0.951746	1121	2	0.8978	0.89771	0.999731	21194	0
NM_001184698	3	0.017688	0.045377	0.951746	1122	2	0.53522	0.54954	0.999731	12997	1
NM_001005922	2	0.017689	0.045383	0.951746	1123	1	0.78717	0.78712	0.999731	18552	0
NM_178564	3	0.017731	0.045477	0.951746	1124	3	0.97073	0.97083	0.999731	23020	0
NM_001270805	3	0.017743	0.045501	0.951746	1125	2	0.80875	0.8087	0.999731	19046	0
NM_022171	3	0.017754	0.045527	0.951746	1126	2	0.88354	0.88338	0.999731	20843	0
NM_015714	3	0.017781	0.045587	0.951746	1127	2	0.41024	0.45714	0.999731	10833	1
NM_001145393	3	0.017796	0.045618	0.951746	1128	2	0.49569	0.51883	0.999731	12293	1
NM_207469	3	0.017797	0.045621	0.951746	1129	3	0.9822	0.98231	0.999731	23296	0
NM_006149	3	0.017837	0.045723	0.951746	1130	3	0.9774	0.97749	0.999731	23179	0
NM_153331	3	0.017838	0.045726	0.951746	1131	2	0.84416	0.84414	0.999731	19878	0
NM_203315	3	0.017905	0.045879	0.951746	1132	2	0.19504	0.30066	0.995378	7109	1
NM_153045	3	0.017924	0.045922	0.951746	1133	2	0.85419	0.85417	0.999731	20110	0
NM_005962	3	0.017931	0.045937	0.951746	1134	3	0.98207	0.98217	0.999731	23295	0
NM_001001670	3	0.017955	0.045994	0.951746	1135	3	0.94868	0.94879	0.999731	22440	0
NM_014458	3	0.017965	0.046009	0.951746	1136	1	0.10649	0.18213	0.995378	4330	2
NM_001278535	3	0.018016	0.046139	0.951746	1137	3	0.98198	0.98209	0.999731	23294	0
NM_000714	3	0.018036	0.046182	0.951746	1138	2	0.36224	0.42499	0.996661	10112	1
NM_021133	3	0.018049	0.046207	0.951746	1139	2	0.09791	0.17035	0.992936	4068	1
NM_033271	3	0.018054	0.046225	0.951746	1140	3	0.98195	0.98205	0.999731	23293	0
NM_001282658	2	0.018083	0.046286	0.951746	1141	1	0.37525	0.43353	0.997594	10311	1
NM_002241	3	0.018091	0.046308	0.951746	1142	2	0.66266	0.66279	0.999731	15620	1
NM_024746	3	0.018092	0.046313	0.951746	1143	3	0.98191	0.98202	0.999731	23292	0
NM_152490	3	0.018104	0.046337	0.951746	1144	3	0.9819	0.98201	0.999731	23291	0
NM_015302	3	0.018133	0.046408	0.951746	1145	2	0.051352	0.10472	0.977105	2521	1
NM_004657	3	0.018151	0.046454	0.951746	1146	3	0.98185	0.98197	0.999731	23290	0
NM_031213	3	0.018181	0.046524	0.951746	1148	3	0.98182	0.98194	0.999731	23289	0
NM_001286526	3	0.018181	0.046524	0.951746	1147	2	0.29621	0.38315	0.995378	9118	1
NM_002032	3	0.018196	0.046556	0.951746	1149	3	0.9818	0.98193	0.999731	23288	0
NM_001736	3	0.018212	0.046593	0.951746	1150	3	0.94874	0.94885	0.999731	22446	0
NM_003395	3	0.018218	0.046605	0.951746	1151	1	0.77301	0.77301	0.999731	18200	0
NM_015503	3	0.018225	0.046618	0.951746	1152	2	0.66005	0.66027	0.999731	15565	1
NM_015836	3	0.018231	0.046629	0.951746	1153	2	0.065251	0.12457	0.977105	3010	1
NM_016032	3	0.01826	0.046701	0.951746	1154	1	0.096315	0.16814	0.990192	4029	1
NM_004782	3	0.018281	0.046761	0.951746	1155	2	0.87973	0.87963	0.999731	20744	0
NM_138418	3	0.018294	0.046787	0.951746	1156	2	0.019566	0.049729	0.938083	1257	1
NM_080391	3	0.018308	0.046826	0.951746	1157	3	0.98169	0.98182	0.999731	23286	0
NM_021148	3	0.018313	0.046835	0.951746	1158	2	0.78038	0.78037	0.999731	18392	0
NM_014733	3	0.018344	0.046908	0.951746	1159	3	0.98166	0.98178	0.999731	23284	0
NM_001164619	3	0.018344	0.046911	0.951746	1160	2	0.90181	0.90174	0.999731	21241	0
NM_006428	3	0.018347	0.046919	0.951746	1161	3	0.98165	0.98178	0.999731	23283	0
NM_001024228	3	0.018349	0.046924	0.951746	1162	3	0.98165	0.98178	0.999731	23282	0
NM_001010926	3	0.01837	0.046969	0.951746	1163	2	0.3258	0.40159	0.995378	9562	1
NM_021935	3	0.018386	0.047009	0.951746	1164	2	0.0051762	0.013987	0.881042	364	1
NM_001448	3	0.018426	0.047096	0.951746	1165	2	0.9121	0.91212	0.999731	21574	0
NM_021111	3	0.018428	0.047103	0.951746	1166	2	0.77635	0.77632	0.999731	18286	0
NM_001130845	3	0.018445	0.047135	0.951746	1167	2	0.36122	0.42434	0.996661	10098	1
NM_001686	3	0.018451	0.047152	0.951746	1168	3	0.98155	0.98167	0.999731	23281	0
NM_053283	3	0.018471	0.047198	0.951746	1169	1	0.48789	0.51292	0.999731	12136	1
NM_001031725	3	0.018477	0.047213	0.951746	1170	3	0.96972	0.96984	0.999731	22994	0
NM_018593	3	0.018486	0.047235	0.951746	1171	3	0.98151	0.98164	0.999731	23280	0
NM_021224	3	0.018489	0.047241	0.951746	1172	3	0.98151	0.98164	0.999731	23279	0
NM_007100	3	0.01849	0.047243	0.951746	1173	2	0.12305	0.20469	0.995378	4852	1
NM_001242956	3	0.018492	0.047247	0.951746	1174	3	0.98151	0.98164	0.999731	23278	0
NM_001524	3	0.018502	0.047272	0.951746	1175	2	0.88544	0.88531	0.999731	20889	0
NM_001256196	3	0.018555	0.047395	0.951746	1176	2	0.78708	0.78703	0.999731	18545	0
NM_017625	3	0.018572	0.047435	0.951746	1177	2	0.72023	0.72039	0.999731	16963	0
NM_198098	3	0.018597	0.047489	0.951746	1178	3	0.94711	0.94715	0.999731	22418	0
NM_014867	3	0.018612	0.047526	0.951746	1179	3	0.98139	0.98152	0.999731	23275	0
NM_178125	3	0.018642	0.047607	0.951746	1180	3	0.98136	0.98149	0.999731	23274	0
NM_001276294	3	0.018642	0.047607	0.951746	1181	2	0.75949	0.75939	0.999731	17883	0
NM_015490	3	0.018667	0.04766	0.951746	1182	2	0.13302	0.21822	0.995378	5175	1
NM_001130915	3	0.018681	0.047696	0.951746	1183	2	0.87302	0.87306	0.999731	20578	0
NM_052855	3	0.018693	0.047723	0.951746	1184	2	0.72598	0.7261	0.999731	17112	0
NM_001118887	3	0.018696	0.047733	0.951746	1185	3	0.9813	0.98144	0.999731	23273	0
NM_002858	3	0.018712	0.047775	0.951746	1186	3	0.97768	0.97777	0.999731	23187	0
NM_001244813	3	0.018723	0.047802	0.951746	1188	1	0.14972	0.24074	0.995378	5687	2
NM_014380	3	0.018723	0.047801	0.951746	1187	3	0.98128	0.98142	0.999731	23272	0
NM_178505	3	0.018766	0.047913	0.951746	1189	1	0.18003	0.281	0.995378	6656	2
NM_006517	3	0.018792	0.04797	0.951746	1190	3	0.98121	0.98135	0.999731	23270	0
NM_138496	3	0.018808	0.048006	0.951746	1191	1	0.70429	0.70445	0.999731	16582	0
NM_015472	1	0.018827	0.048057	0.951746	1192	1	0.98117	0.98131	0.999731	23269	0
NM_001048195	3	0.01885	0.048115	0.951746	1194	2	0.0026223	0.0072165	0.881042	193	1
NM_152390	3	0.01885	0.048115	0.951746	1193	3	0.98115	0.98129	0.999731	23268	0
NM_001258403	3	0.018859	0.048139	0.951746	1195	3	0.97757	0.97766	0.999731	23185	0
NM_172250	3	0.018878	0.048184	0.951746	1196	2	0.78766	0.78762	0.999731	18561	0
NM_001184963	3	0.018886	0.048201	0.951746	1197	3	0.98111	0.98126	0.999731	23267	0
NM_001013672	3	0.018892	0.048218	0.951746	1198	1	0.37405	0.43276	0.9975	10292	1
NM_022486	3	0.018907	0.048253	0.951746	1199	3	0.98109	0.98124	0.999731	23266	0
NM_016399	3	0.018916	0.048272	0.951746	1200	3	0.98108	0.98123	0.999731	23265	0
NM_002988	3	0.018925	0.048291	0.951746	1201	3	0.98107	0.98122	0.999731	23264	0
NM_032727	3	0.018976	0.048415	0.951746	1202	1	0.3658	0.42731	0.996661	10170	1
NM_014344	3	0.018987	0.048441	0.951746	1203	2	0.74593	0.74594	0.999731	17601	0
NM_001195280	3	0.01901	0.048493	0.951746	1204	3	0.98099	0.98114	0.999731	23263	0
NM_022120	3	0.019018	0.048513	0.951746	1205	1	0.004921	0.013318	0.881042	344	2
NM_014286	3	0.019026	0.048527	0.951746	1206	3	0.98097	0.98112	0.999731	23262	0
NM_001142587	3	0.019032	0.04854	0.951746	1207	3	0.98097	0.98112	0.999731	23261	0
NM_015705	3	0.019045	0.048576	0.951746	1208	2	0.80913	0.80909	0.999731	19051	0
NM_004634	3	0.019051	0.048591	0.951746	1209	2	0.91378	0.91376	0.999731	21613	0
NM_002123	3	0.01906	0.048619	0.951746	1210	2	0.80117	0.80109	0.999731	18871	0
NM_001160036	3	0.019064	0.048627	0.951746	1211	3	0.96045	0.96063	0.999731	22739	0
NM_001082619	3	0.019123	0.048759	0.951746	1212	3	0.98088	0.98103	0.999731	23260	0
NM_005856	3	0.019138	0.048797	0.951746	1213	3	0.98086	0.98102	0.999731	23259	0
NM_001166212	3	0.019145	0.048812	0.951746	1214	2	0.75626	0.75617	0.999731	17808	0
NM_018086	3	0.019167	0.048862	0.951746	1215	3	0.9487	0.94881	0.999731	22441	0
NM_001199583	3	0.019187	0.048905	0.951746	1216	3	0.96482	0.96494	0.999731	22849	0
NM_000831	3	0.019192	0.04892	0.951746	1217	2	0.41168	0.45814	0.999731	10854	1
NM_001195220	3	0.019199	0.04894	0.951746	1218	2	0.63834	0.63931	0.999731	15078	1
NM_014732	3	0.019203	0.048951	0.951746	1219	3	0.9808	0.98096	0.999731	23258	0
NM_004997	3	0.019225	0.049008	0.951746	1220	2	0.058995	0.11565	0.977105	2778	1
NM_014246	3	0.019229	0.049017	0.951746	1221	1	0.2029	0.31097	0.995378	7375	2
NM_007055	3	0.01923	0.049021	0.951746	1222	3	0.98077	0.98093	0.999731	23257	0
NM_020717	3	0.019245	0.049055	0.951746	1223	3	0.98075	0.98091	0.999731	23256	0
NM_001287528	3	0.019271	0.049113	0.952085	1224	1	0.49442	0.51786	0.999731	12266	1
NM_001099681	3	0.019313	0.049223	0.952144	1225	1	0.44878	0.48409	0.999731	11473	1
NM_153446	3	0.019341	0.049289	0.952144	1226	3	0.98066	0.9808	0.999731	23255	0
NM_080627	3	0.019355	0.04932	0.952144	1227	1	0.042795	0.092448	0.977105	2215	2
NM_001145770	3	0.01939	0.04941	0.952144	1228	3	0.98061	0.98075	0.999731	23254	0
NM_001201576	3	0.019398	0.049426	0.952144	1229	2	0.87025	0.87031	0.999731	20507	0
NM_002563	3	0.019451	0.049558	0.952144	1230	2	0.64037	0.64123	0.999731	15119	1
NM_152523	3	0.019464	0.04959	0.952144	1231	3	0.98054	0.98068	0.999731	23252	0
NM_173560	3	0.019482	0.049635	0.952144	1232	1	0.048865	0.10116	0.977105	2433	2
NM_014555	3	0.019509	0.049708	0.952144	1233	2	0.82006	0.82011	0.999731	19304	0
NM_001005366	3	0.019547	0.049791	0.952144	1234	3	0.98045	0.9806	0.999731	23251	0
NM_001039842	3	0.019561	0.04982	0.952144	1235	2	0.30966	0.39152	0.995378	9306	1
NM_024078	3	0.019566	0.049836	0.952144	1236	1	0.13926	0.22665	0.995378	5381	1
NM_001275	3	0.019581	0.049868	0.952144	1237	3	0.98042	0.98056	0.999731	23250	0
NM_001146203	3	0.019606	0.049943	0.952144	1238	3	0.98039	0.98054	0.999731	23249	0
NM_013309	3	0.019608	0.049946	0.952144	1239	1	0.69368	0.69385	0.999731	16344	0
NM_001270410	3	0.019627	0.049997	0.952144	1240	2	0.90931	0.90925	0.999731	21510	0
NM_024067	3	0.019631	0.050005	0.952144	1241	3	0.98037	0.98052	0.999731	23248	0
NM_001079864	3	0.019668	0.050089	0.952144	1242	3	0.98033	0.98049	0.999731	23247	0
NM_001039876	3	0.019672	0.050101	0.952144	1243	2	0.30364	0.38776	0.995378	9226	1
NM_021030	3	0.019679	0.050114	0.952144	1244	2	0.48211	0.5086	0.999731	12027	1
NM_206831	3	0.019734	0.050242	0.952144	1245	1	0.54294	0.55579	0.999731	13135	1
NM_001193515	3	0.019748	0.05028	0.952144	1246	3	0.98025	0.9804	0.999731	23245	0
NM_015025	3	0.019763	0.050314	0.952144	1247	2	0.66779	0.66794	0.999731	15751	1
NM_022478	3	0.019777	0.050346	0.952144	1249	3	0.98022	0.98037	0.999731	23244	0
NM_003596	3	0.019777	0.050346	0.952144	1248	2	0.05094	0.10414	0.977105	2507	1
NM_207328	3	0.019796	0.050395	0.952144	1250	3	0.95391	0.95406	0.999731	22574	0
NM_015233	3	0.019809	0.050427	0.952144	1251	2	0.78541	0.78534	0.999731	18502	0
NM_017785	3	0.019816	0.050445	0.952144	1252	2	0.67906	0.67927	0.999731	16026	0
NM_198153	3	0.019835	0.050481	0.952144	1253	2	0.89794	0.89784	0.999731	21198	0
NM_022740	3	0.019861	0.050543	0.952144	1254	1	0.13461	0.22034	0.995378	5232	1
NM_024813	3	0.019875	0.050577	0.952144	1255	2	0.83642	0.83649	0.999731	19679	0
NM_001127645	3	0.019888	0.050606	0.952144	1256	2	0.58569	0.59168	0.999731	13949	1
NM_006148	3	0.019903	0.050641	0.952144	1257	1	0.23791	0.34832	0.995378	8266	1
NM_199440	3	0.019924	0.050694	0.952144	1258	3	0.98008	0.98022	0.999731	23243	0
NM_001164749	3	0.019945	0.050735	0.952144	1259	3	0.97825	0.97835	0.999731	23199	0
NM_001012761	3	0.019956	0.050764	0.952144	1260	3	0.98004	0.98019	0.999731	23242	0
NM_001271970	3	0.01996	0.050777	0.952144	1261	2	0.39654	0.44774	0.999359	10629	1
NM_199141	3	0.019968	0.050799	0.952144	1262	3	0.98003	0.98018	0.999731	23241	0
NM_001143944	3	0.019987	0.050842	0.952144	1263	1	0.68502	0.68522	0.999731	16155	0
NM_032558	3	0.019987	0.050842	0.952144	1264	3	0.98001	0.98016	0.999731	23240	0
NM_019059	3	0.019999	0.05087	0.952144	1265	2	0.49209	0.51609	0.999731	12217	1
NM_014331	3	0.020012	0.050899	0.952144	1266	3	0.97999	0.98013	0.999731	23239	0
NM_144710	3	0.020044	0.050966	0.952144	1267	3	0.97996	0.9801	0.999731	23238	0
NM_001033520	3	0.020045	0.050968	0.952144	1268	2	0.91796	0.91803	0.999731	21711	0
NM_032779	3	0.020071	0.05103	0.952144	1269	2	0.56653	0.57531	0.999731	13581	1
NM_006387	3	0.020085	0.051067	0.952144	1270	2	0.57423	0.58187	0.999731	13727	1
NM_006256	3	0.020113	0.051134	0.952144	1271	2	0.54504	0.5575	0.999731	13174	1
NM_001190971	3	0.020151	0.051219	0.952144	1273	3	0.97985	0.97999	0.999731	23237	0
NM_002970	3	0.020151	0.051218	0.952144	1272	2	0.87736	0.87729	0.999731	20682	0
NM_033450	3	0.020176	0.05128	0.952144	1274	3	0.97982	0.97996	0.999731	23236	0
NM_001253830	3	0.020198	0.051324	0.952144	1275	1	0.44206	0.47929	0.999731	11360	1
NM_001039567	3	0.02024	0.051445	0.952144	1276	3	0.94256	0.94251	0.999731	22323	0
NM_005171	3	0.020276	0.051531	0.952144	1277	2	0.54542	0.55779	0.999731	13180	1
NM_001193478	3	0.020282	0.051541	0.952144	1278	2	0.37139	0.43098	0.997448	10251	1
NM_001185056	3	0.020289	0.051556	0.952144	1279	2	0.20519	0.31395	0.995378	7453	1
NM_181482	3	0.02031	0.051601	0.952144	1280	3	0.97969	0.97983	0.999731	23235	0
NM_014431	3	0.020362	0.051736	0.952144	1281	2	0.52183	0.53896	0.999731	12745	1
NM_001010917	3	0.020366	0.051746	0.952144	1282	2	0.027756	0.06901	0.975694	1675	1
NM_001286766	3	0.020375	0.051765	0.952144	1283	2	0.10582	0.18121	0.995378	4310	1
NM_001014279	3	0.020402	0.051832	0.952144	1284	3	0.9796	0.97974	0.999731	23234	0
NM_153343	3	0.020408	0.051842	0.952144	1286	3	0.97959	0.97973	0.999731	23233	0
NM_015235	3	0.020408	0.051841	0.952144	1285	1	0.82905	0.8291	0.999731	19516	0
NM_001278785	3	0.020409	0.051843	0.952144	1287	2	0.87837	0.87828	0.999731	20708	0
NM_001178062	3	0.02045	0.051936	0.952144	1288	3	0.92405	0.92413	0.999731	21857	0
NM_005446	3	0.020475	0.051999	0.952144	1289	2	0.66082	0.66101	0.999731	15582	1
NM_000024	3	0.020492	0.052046	0.952144	1290	2	0.80027	0.80017	0.999731	18850	0
NM_053274	3	0.020508	0.05208	0.952144	1291	2	0.5315	0.54662	0.999731	12933	1
NM_002304	3	0.02053	0.05213	0.952144	1292	3	0.97947	0.97961	0.999731	23230	0
NM_175077	3	0.020534	0.052143	0.952144	1293	1	0.30203	0.38677	0.995378	9206	1
NM_134259	3	0.020574	0.052237	0.952144	1294	3	0.97943	0.97957	0.999731	23229	0
NM_006634	3	0.020576	0.052243	0.952144	1295	3	0.94099	0.94094	0.999731	22286	0
NM_181519	3	0.020594	0.052289	0.952144	1296	3	0.97941	0.97953	0.999731	23228	0
NM_001098202	3	0.020619	0.052344	0.952144	1297	2	0.69829	0.69844	0.999731	16445	0
NM_020175	3	0.020661	0.052441	0.952144	1298	2	0.4334	0.47318	0.999731	11217	1
NM_000125	3	0.020661	0.052441	0.952144	1299	2	0.33166	0.4053	0.995378	9653	1
NM_001135750	3	0.020701	0.052527	0.952144	1300	2	0.55943	0.56932	0.999731	13440	1
NM_033656	3	0.020703	0.052531	0.952144	1301	2	0.812	0.81196	0.999731	19124	0
NM_007188	3	0.020721	0.052573	0.952144	1302	2	0.12415	0.20619	0.995378	4886	1
NM_013430	3	0.020745	0.052625	0.952144	1303	2	0.82538	0.82549	0.999731	19434	0
NM_001282697	3	0.020768	0.052677	0.952144	1304	2	0.8215	0.82157	0.999731	19340	0
NM_001143997	3	0.020787	0.052729	0.952144	1305	1	0.0020097	0.0055795	0.857999	152	2
NM_001009939	3	0.020809	0.052784	0.952144	1306	3	0.97919	0.97932	0.999731	23227	0
NM_015655	3	0.020829	0.052841	0.952144	1307	2	0.77789	0.77785	0.999731	18325	0
NM_001253801	3	0.020832	0.052843	0.952144	1308	3	0.97917	0.97929	0.999731	23226	0
NM_031305	3	0.020871	0.052944	0.952144	1309	2	0.2072	0.3165	0.995378	7521	1
NM_007241	3	0.020893	0.052996	0.952144	1310	3	0.97911	0.97923	0.999731	23225	0
NM_080632	3	0.020913	0.053048	0.952144	1311	3	0.949	0.94912	0.999731	22452	0
NM_001199860	3	0.020922	0.053071	0.952144	1312	2	0.32159	0.39891	0.995378	9489	1
NM_014583	3	0.020955	0.053146	0.952144	1313	2	0.088595	0.15728	0.986653	3776	1
NM_003420	3	0.020968	0.053173	0.952144	1314	3	0.97903	0.97915	0.999731	23224	0
NM_002969	3	0.020989	0.053223	0.952144	1315	2	0.70181	0.70196	0.999731	16519	0
NM_001146209	3	0.020997	0.053237	0.952144	1316	2	0.82417	0.82425	0.999731	19407	0
NM_006049	3	0.021039	0.053345	0.952144	1317	3	0.93232	0.93232	0.999731	22064	0
NM_025065	3	0.021043	0.053353	0.952144	1318	3	0.97896	0.97908	0.999731	23222	0
NM_033254	3	0.02105	0.05337	0.952144	1319	3	0.96054	0.96072	0.999731	22742	0
NM_006717	3	0.021052	0.053376	0.952144	1320	3	0.97895	0.97907	0.999731	23221	0
NM_001288976	3	0.021072	0.053424	0.952144	1321	3	0.97893	0.97905	0.999731	23220	0
NM_016257	3	0.021081	0.053447	0.952144	1322	1	0.57009	0.57833	0.999731	13648	1
NM_001139488	3	0.021084	0.053452	0.952144	1323	2	0.80327	0.80318	0.999731	18921	0
NM_001144966	3	0.021085	0.053455	0.952144	1324	3	0.97892	0.97903	0.999731	23219	0
NM_001136105	3	0.02109	0.05347	0.952144	1325	2	0.061983	0.11993	0.977105	2884	1
NM_080864	3	0.021121	0.053537	0.952144	1326	3	0.97888	0.97899	0.999731	23217	0
NM_001145547	3	0.021124	0.053545	0.952144	1327	2	0.14565	0.23529	0.995378	5569	1
NM_015456	3	0.021144	0.053596	0.952144	1328	3	0.97886	0.97897	0.999731	23216	0
NM_001024960	3	0.021151	0.053617	0.952144	1329	3	0.92195	0.92202	0.999731	21806	0
NM_001005339	3	0.021166	0.053645	0.952144	1330	1	0.15123	0.24272	0.995378	5740	2
NM_001128149	3	0.02117	0.053654	0.952144	1331	3	0.97883	0.97895	0.999731	23215	0
NM_004685	3	0.021173	0.053658	0.952144	1332	3	0.97883	0.97894	0.999731	23214	0
NM_014470	3	0.021178	0.053667	0.952144	1333	2	0.91915	0.9192	0.999731	21741	0
NM_153218	3	0.021185	0.05368	0.952144	1334	3	0.93818	0.93814	0.999731	22210	0
NM_032304	3	0.021198	0.053722	0.952144	1335	2	0.28562	0.37673	0.995378	8970	1
NM_173568	3	0.021205	0.053733	0.952144	1336	2	0.47353	0.50231	0.999731	11873	1
NM_058182	3	0.021208	0.053743	0.952144	1337	1	0.65669	0.65697	0.999731	15485	1
NM_013302	3	0.021212	0.053753	0.952144	1338	2	0.67227	0.67246	0.999731	15858	0
NM_022346	3	0.021215	0.053761	0.952144	1339	3	0.97878	0.97889	0.999731	23213	0
NM_014521	3	0.021232	0.053801	0.952144	1340	3	0.97877	0.97888	0.999731	23212	0
NM_001201377	3	0.02125	0.053846	0.952144	1341	1	0.18506	0.28757	0.995378	6806	2
NM_001973	3	0.021251	0.053851	0.952144	1342	3	0.97875	0.97886	0.999731	23211	0
NM_021146	3	0.021281	0.053914	0.952541	1343	3	0.97872	0.97883	0.999731	23210	0
NM_002270	3	0.021327	0.054019	0.95323	1344	3	0.97867	0.97878	0.999731	23209	0
NM_181645	3	0.021334	0.054033	0.95323	1345	1	0.014972	0.038731	0.922274	991	2
NM_006520	3	0.021393	0.054179	0.955103	1346	3	0.97861	0.97871	0.999731	23208	0
NM_015428	3	0.021449	0.054311	0.956573	1347	3	0.97581	0.9759	0.999731	23146	0
NM_021724	3	0.02146	0.054343	0.956573	1348	2	0.67736	0.67755	0.999731	15985	0
NM_014445	3	0.021475	0.054384	0.956576	1349	3	0.97853	0.97864	0.999731	23206	0
NM_032369	3	0.021502	0.054448	0.956826	1350	1	0.47403	0.50267	0.999731	11884	1
NM_152758	3	0.021523	0.054501	0.956826	1351	2	0.68259	0.68279	0.999731	16092	0
NM_181787	3	0.021544	0.054549	0.956826	1352	2	0.69257	0.69274	0.999731	16317	0
NM_182616	3	0.021586	0.054648	0.956826	1353	3	0.95352	0.95365	0.999731	22567	0
NM_052841	3	0.02161	0.054702	0.956826	1354	3	0.97839	0.9785	0.999731	23205	0
NM_001190158	3	0.021612	0.054704	0.956826	1355	3	0.9526	0.95273	0.999731	22544	0
NM_206949	3	0.021627	0.054739	0.956826	1356	3	0.97837	0.97848	0.999731	23204	0
NM_001105573	3	0.021653	0.054804	0.956826	1357	3	0.97835	0.97845	0.999731	23203	0
NM_199347	3	0.02167	0.054839	0.956826	1358	2	0.5668	0.57553	0.999731	13586	1
NM_198827	3	0.021677	0.054855	0.956826	1359	3	0.97832	0.97843	0.999731	23202	0
NM_021023	3	0.021712	0.05493	0.956826	1360	2	0.61258	0.61562	0.999731	14533	1
NM_058170	3	0.021736	0.054982	0.956826	1361	3	0.97826	0.97837	0.999731	23201	0
NM_001144063	3	0.021743	0.054995	0.956826	1362	3	0.97826	0.97836	0.999731	23200	0
NM_005174	3	0.021754	0.055018	0.956826	1363	1	0.11819	0.198	0.995378	4704	2
NM_001171946	3	0.02178	0.055073	0.956826	1364	3	0.97822	0.97833	0.999731	23198	0
NM_152899	3	0.021783	0.055082	0.956826	1365	3	0.97822	0.97832	0.999731	23197	0
NM_201550	3	0.021797	0.055108	0.956826	1366	1	0.48238	0.50881	0.999731	12031	1
NM_002902	3	0.021837	0.055214	0.956826	1367	2	0.026876	0.066972	0.97522	1628	1
NM_001271840	3	0.021839	0.055218	0.956826	1368	1	0.44533	0.48162	0.999731	11416	1
NM_001202474	3	0.021851	0.055244	0.956826	1369	2	0.66079	0.66098	0.999731	15580	1
NM_013446	3	0.021858	0.05526	0.956826	1370	2	0.91851	0.91859	0.999731	21730	0
NM_173211	3	0.021881	0.055316	0.956826	1371	2	0.48612	0.51158	0.999731	12102	1
NM_001289746	3	0.021896	0.055352	0.956826	1372	3	0.9781	0.97821	0.999731	23196	0
NM_182504	3	0.021923	0.055421	0.956826	1373	1	0.63834	0.63931	0.999731	15080	1
NM_001172085	3	0.02195	0.055487	0.956826	1374	3	0.97805	0.97815	0.999731	23194	0
NM_001289401	3	0.021963	0.055521	0.956826	1375	3	0.97804	0.97814	0.999731	23193	0
NM_000614	3	0.021965	0.055523	0.956826	1376	2	0.83754	0.8376	0.999731	19713	0
NM_002642	3	0.021968	0.055527	0.956826	1377	3	0.96971	0.96983	0.999731	22993	0
NM_006185	3	0.022002	0.055614	0.957061	1378	2	0.049125	0.10154	0.977105	2442	1
NM_001127605	3	0.022007	0.055622	0.957061	1379	1	0.29705	0.38365	0.995378	9131	1
NM_194325	3	0.022049	0.055715	0.957276	1380	1	0.0145	0.037601	0.922274	961	2
NM_025098	3	0.022057	0.055739	0.957276	1381	2	0.096355	0.1682	0.990192	4030	1
NM_001174090	3	0.022064	0.055755	0.957276	1382	2	0.65519	0.65549	0.999731	15445	1
NM_015123	3	0.022091	0.055813	0.957586	1383	2	0.39067	0.44381	0.998945	10540	1
NM_002705	3	0.022133	0.055915	0.957735	1384	2	0.21169	0.32238	0.995378	7656	1
NM_001276414	3	0.022133	0.055916	0.957735	1385	2	0.081476	0.14748	0.985069	3549	1
NM_174902	3	0.022175	0.056005	0.957735	1386	1	0.10246	0.17662	0.994744	4213	2
NM_152678	3	0.022217	0.056096	0.957735	1387	1	0.012769	0.033304	0.918225	858	1
NM_021970	3	0.022222	0.056108	0.957735	1388	3	0.97778	0.97786	0.999731	23190	0
NM_001126050	3	0.022232	0.056139	0.957735	1389	3	0.97777	0.97785	0.999731	23189	0
NM_019854	3	0.02225	0.056177	0.957735	1390	3	0.94528	0.94529	0.999731	22382	0
NM_001077653	3	0.022259	0.056201	0.957735	1391	2	0.4315	0.47186	0.999731	11191	1
NM_207645	3	0.022277	0.056241	0.957735	1392	2	0.011542	0.030284	0.914018	785	1
NM_014399	3	0.022301	0.056295	0.957735	1393	1	0.046016	0.097071	0.977105	2331	2
NM_001178034	3	0.022312	0.056322	0.957735	1394	2	0.63554	0.63673	0.999731	15020	1
NM_007179	3	0.02232	0.056335	0.957735	1395	3	0.97768	0.97777	0.999731	23188	0
NM_017528	3	0.022326	0.05635	0.957735	1396	2	0.91017	0.91017	0.999731	21531	0
NM_001099285	3	0.02234	0.056387	0.957735	1397	3	0.97766	0.97775	0.999731	23186	0
NM_012452	3	0.022385	0.056495	0.958877	1398	1	0.86282	0.86286	0.999731	20324	0
NM_001135242	3	0.022427	0.056603	0.959438	1399	2	0.49734	0.52009	0.999731	12328	1
NM_016256	3	0.022442	0.056633	0.959438	1400	3	0.97756	0.97765	0.999731	23184	0
NM_033229	3	0.022469	0.05669	0.959438	1401	1	0.19423	0.29962	0.995378	7082	2
NM_001122951	3	0.022479	0.056719	0.959438	1402	3	0.97752	0.97761	0.999731	23183	0
NM_032709	3	0.022486	0.056736	0.959438	1403	3	0.97751	0.97761	0.999731	23182	0
NM_001104	3	0.022506	0.056785	0.959438	1404	2	0.53783	0.5516	0.999731	13044	1
NM_001382	3	0.022553	0.056901	0.959438	1405	1	0.0064023	0.017227	0.889747	458	2
NM_181093	3	0.022558	0.056909	0.959438	1406	3	0.97744	0.97752	0.999731	23181	0
NM_018926	3	0.022562	0.05692	0.959438	1407	2	0.37708	0.43472	0.997877	10337	1
NM_024409	3	0.022575	0.056952	0.959438	1408	2	0.44339	0.48024	0.999731	11385	1
NM_175882	3	0.022589	0.056982	0.959438	1409	2	0.81981	0.81984	0.999731	19296	0
NM_058186	3	0.022603	0.057013	0.959438	1410	2	0.90181	0.90174	0.999731	21249	0
NM_001040260	3	0.022629	0.057081	0.959901	1411	3	0.97737	0.97746	0.999731	23178	0
NM_004937	3	0.022679	0.057195	0.960834	1412	1	0.76139	0.76126	0.999731	17924	0
NM_001042368	3	0.022691	0.057218	0.960834	1413	3	0.97731	0.97739	0.999731	23177	0
NM_170609	3	0.022721	0.057289	0.961133	1414	2	0.66374	0.66389	0.999731	15643	1
NM_006320	3	0.022743	0.057349	0.961133	1415	3	0.92675	0.92683	0.999731	21913	0
NM_014960	3	0.022759	0.057387	0.961133	1416	3	0.97724	0.97732	0.999731	23176	0
NM_021110	3	0.022763	0.057397	0.961133	1417	2	0.90181	0.90174	0.999731	21251	0
NM_001143984	3	0.022802	0.057493	0.962054	1418	3	0.9772	0.97727	0.999731	23174	0
NM_139241	3	0.022826	0.057557	0.962269	1419	2	0.88708	0.8869	0.999731	20920	0
NM_001136050	3	0.022847	0.057604	0.962269	1420	1	0.71603	0.7162	0.999731	16858	0
NM_002519	3	0.022875	0.057669	0.962269	1421	2	0.75501	0.75493	0.999731	17784	0
NM_001077500	3	0.02289	0.057698	0.962269	1422	3	0.96772	0.96788	0.999731	22939	0
NM_001284269	3	0.022896	0.05771	0.962269	1423	3	0.96142	0.96162	0.999731	22769	0
NM_003477	3	0.022917	0.057756	0.962269	1424	2	0.86406	0.8641	0.999731	20347	0
NM_133450	3	0.022932	0.05779	0.962269	1425	2	0.85983	0.85982	0.999731	20244	0
NM_001168278	3	0.022983	0.057912	0.963153	1426	3	0.97702	0.97708	0.999731	23172	0
NM_002695	3	0.023007	0.057967	0.963153	1427	3	0.97699	0.97707	0.999731	23171	0
NM_031268	3	0.023016	0.057984	0.963153	1428	1	0.041719	0.090865	0.977105	2182	1
NM_024894	3	0.023058	0.058094	0.963153	1429	1	0.57128	0.57931	0.999731	13667	1
NM_001759	3	0.023111	0.058208	0.963153	1430	3	0.97689	0.97696	0.999731	23169	0
NM_001130047	2	0.023123	0.058242	0.963153	1431	1	0.19929	0.30624	0.995378	7248	1
NM_016132	3	0.023156	0.058317	0.963153	1432	3	0.95798	0.95818	0.999731	22672	0
NM_006211	3	0.023212	0.058454	0.963153	1433	2	0.80307	0.80295	0.999731	18918	0
NM_001014283	3	0.023226	0.05849	0.963153	1434	2	0.65485	0.65515	0.999731	15435	1
NM_001199381	3	0.023232	0.058507	0.963153	1435	3	0.97677	0.97684	0.999731	23168	0
NM_012333	3	0.023249	0.058548	0.963153	1436	3	0.97675	0.97682	0.999731	23167	0
NM_002565	3	0.023268	0.05859	0.963153	1437	1	0.67605	0.67623	0.999731	15958	0
NM_003840	3	0.023276	0.058613	0.963153	1438	2	0.42054	0.46426	0.999731	11000	1
NM_016246	3	0.023304	0.058679	0.963153	1439	2	0.8494	0.84933	0.999731	19998	0
NM_001136203	3	0.023346	0.058773	0.963153	1440	3	0.94234	0.94229	0.999731	22317	0
NM_021992	3	0.023352	0.058789	0.963153	1441	2	0.89189	0.89178	0.999731	21031	0
NM_022097	3	0.023378	0.058853	0.963153	1442	3	0.97662	0.97669	0.999731	23165	0
NM_001619	3	0.023394	0.058896	0.963153	1443	1	0.15823	0.25202	0.995378	5969	1
NM_199166	3	0.023403	0.058917	0.963153	1444	3	0.9766	0.97666	0.999731	23164	0
NM_005718	3	0.023403	0.058917	0.963153	1445	2	0.84046	0.8405	0.999731	19784	0
NM_198076	3	0.023422	0.058958	0.963153	1446	3	0.97658	0.97664	0.999731	23163	0
NM_005999	3	0.023422	0.058958	0.963153	1447	3	0.97658	0.97664	0.999731	23162	0
NM_024725	3	0.023427	0.058968	0.963153	1448	3	0.97657	0.97664	0.999731	23161	0
NM_178124	3	0.023436	0.058983	0.963153	1449	1	0.54711	0.55917	0.999731	13211	1
NM_001191013	3	0.023455	0.059031	0.963153	1450	3	0.97655	0.97661	0.999731	23160	0
NM_018846	3	0.023502	0.05914	0.963153	1451	2	0.79328	0.7932	0.999731	18697	0
NM_001130698	3	0.023516	0.059174	0.963153	1452	3	0.97648	0.97655	0.999731	23159	0
NM_004540	3	0.023532	0.059209	0.963153	1453	3	0.97647	0.97654	0.999731	23158	0
NM_018356	3	0.02355	0.059247	0.963153	1454	3	0.97645	0.97652	0.999731	23156	0
NM_181610	3	0.023551	0.059251	0.963153	1455	2	0.86531	0.86535	0.999731	20385	0
NM_003652	3	0.023559	0.059264	0.963153	1456	2	0.59948	0.60381	0.999731	14254	1
NM_006504	3	0.023562	0.059272	0.963153	1457	1	0.70617	0.70636	0.999731	16622	0
NM_032263	3	0.02358	0.059314	0.963153	1458	2	0.84126	0.84127	0.999731	19808	0
NM_002117	3	0.023604	0.059377	0.963153	1459	2	0.25245	0.35679	0.995378	8486	1
NM_016014	3	0.023615	0.059407	0.963153	1460	2	0.90181	0.90174	0.999731	21254	0
NM_004804	3	0.023672	0.059549	0.963153	1461	3	0.96077	0.96095	0.999731	22749	0
NM_001146706	3	0.02368	0.059563	0.963153	1462	3	0.97632	0.9764	0.999731	23155	0
NM_015190	3	0.023688	0.059579	0.963153	1463	1	0.64849	0.64903	0.999731	15295	1
NM_053051	3	0.023718	0.059653	0.963153	1464	3	0.97628	0.97636	0.999731	23154	0
NM_002061	3	0.02373	0.059684	0.963153	1465	1	0.050318	0.10324	0.977105	2483	2
NM_001127392	3	0.023772	0.059782	0.963153	1466	2	0.056698	0.11238	0.977105	2692	1
NM_014301	3	0.023775	0.059789	0.963153	1467	3	0.97623	0.9763	0.999731	23153	0
NM_001005473	3	0.023779	0.0598	0.963153	1468	3	0.94365	0.94364	0.999731	22345	0
NM_201595	3	0.023856	0.059979	0.963153	1469	2	0.84587	0.84588	0.999731	19914	0
NM_145754	3	0.023888	0.060057	0.963153	1470	3	0.97611	0.97619	0.999731	23152	0
NM_012250	3	0.023902	0.060092	0.963153	1471	3	0.9761	0.97618	0.999731	23151	0
NM_001193521	3	0.023964	0.060245	0.963153	1472	2	0.50304	0.52449	0.999731	12419	1
NM_002115	3	0.02398	0.060282	0.963153	1473	3	0.97602	0.9761	0.999731	23150	0
NM_017617	3	0.023982	0.060291	0.963153	1474	2	0.75603	0.75594	0.999731	17803	0
NM_001243537	3	0.024012	0.060361	0.963153	1475	3	0.97599	0.97607	0.999731	23149	0
NM_002912	3	0.024024	0.060391	0.963153	1476	2	0.18711	0.29025	0.995378	6873	1
NM_005318	3	0.024036	0.060418	0.963153	1477	2	0.17302	0.27171	0.995378	6426	1
NM_173551	3	0.024066	0.060488	0.963153	1478	3	0.95297	0.95312	0.999731	22554	0
NM_001287763	3	0.024108	0.060596	0.963153	1479	2	0.60739	0.61097	0.999731	14416	1
NM_001206736	3	0.024111	0.060604	0.963153	1480	3	0.97589	0.97597	0.999731	23148	0
NM_004836	3	0.024122	0.06063	0.963153	1481	3	0.97588	0.97596	0.999731	23147	0
NM_153215	3	0.02415	0.060694	0.963153	1482	2	0.12423	0.2063	0.995378	4887	1
NM_145252	3	0.024179	0.060758	0.963153	1483	2	0.91498	0.91504	0.999731	21645	0
NM_000863	3	0.024192	0.060781	0.963153	1484	1	0.026289	0.065641	0.974167	1596	2
NM_033225	3	0.024201	0.060803	0.963153	1485	3	0.9758	0.97588	0.999731	23145	0
NM_021026	1	0.024233	0.060863	0.963153	1486	1	0.97577	0.97585	0.999731	23144	0
NM_001253382	3	0.024234	0.060865	0.963153	1487	2	0.17614	0.27583	0.995378	6536	1
NM_001145292	3	0.02424	0.060882	0.963153	1488	3	0.97576	0.97584	0.999731	23143	0
NM_007173	3	0.024258	0.060933	0.963153	1489	3	0.93203	0.93203	0.999731	22050	0
NM_018030	3	0.024268	0.060953	0.963153	1490	3	0.97573	0.97581	0.999731	23142	0
NM_001038707	3	0.024276	0.060969	0.963153	1491	2	0.81738	0.81737	0.999731	19246	0
NM_001105079	3	0.024292	0.061005	0.963153	1492	3	0.97571	0.97579	0.999731	23141	0
NM_006670	3	0.024309	0.061051	0.963153	1493	2	0.82964	0.82968	0.999731	19531	0
NM_001144955	3	0.024316	0.061068	0.963153	1494	2	0.13852	0.22565	0.995378	5354	1
NM_022752	3	0.024318	0.061072	0.963153	1495	2	0.82058	0.82063	0.999731	19321	0
NM_198794	3	0.024354	0.061148	0.963153	1496	3	0.97565	0.97572	0.999731	23140	0
NM_178563	3	0.024358	0.061158	0.963153	1497	3	0.97564	0.97572	0.999731	23139	0
NM_152912	3	0.024359	0.061159	0.963153	1498	2	0.66045	0.66065	0.999731	15574	1
NM_024817	3	0.024383	0.061223	0.963153	1499	3	0.97562	0.97569	0.999731	23138	0
NM_001145165	3	0.024394	0.061245	0.963153	1500	3	0.97561	0.97568	0.999731	23137	0
NM_194318	3	0.024402	0.061265	0.963153	1501	1	0.85197	0.85194	0.999731	20066	0
NM_024613	3	0.024437	0.061333	0.963153	1502	3	0.97556	0.97563	0.999731	23136	0
NM_001278055	3	0.024441	0.061345	0.963153	1503	3	0.97556	0.97563	0.999731	23135	0
NM_001099409	3	0.024444	0.061351	0.963153	1504	2	0.61732	0.61994	0.999731	14641	1
NM_012401	3	0.024462	0.061396	0.963153	1505	3	0.97554	0.9756	0.999731	23134	0
NM_001197181	3	0.024467	0.061406	0.963153	1506	2	0.068023	0.1285	0.977105	3114	1
NM_016377	3	0.024489	0.061455	0.963153	1507	2	0.11308	0.19114	0.995378	4537	1
NM_003154	3	0.024491	0.061461	0.963153	1508	3	0.97551	0.97556	0.999731	23133	0
NM_005792	3	0.024502	0.061486	0.963153	1509	3	0.9755	0.97555	0.999731	23132	0
NM_001004462	3	0.02451	0.061508	0.963153	1510	2	0.071439	0.13326	0.979822	3227	1
NM_001177599	3	0.024527	0.061553	0.963153	1511	1	0.35707	0.42163	0.996661	10032	1
NM_019029	3	0.024569	0.061655	0.963153	1512	3	0.94899	0.94911	0.999731	22451	0
NM_001145727	3	0.02459	0.061704	0.963153	1513	2	0.59364	0.5987	0.999731	14127	1
NM_006197	3	0.024611	0.061754	0.963153	1514	2	0.10851	0.18488	0.995378	4389	1
NM_001003938	3	0.024614	0.061756	0.963153	1515	3	0.97539	0.97543	0.999731	23131	0
NM_020451	3	0.024653	0.061851	0.963153	1516	1	0.80369	0.8036	0.999731	18935	0
NM_130445	3	0.024661	0.061865	0.963153	1517	3	0.97534	0.97539	0.999731	23130	0
NM_080832	3	0.02467	0.061883	0.963153	1518	2	0.39961	0.44981	0.999731	10671	1
NM_152896	3	0.024679	0.061904	0.963153	1519	3	0.97532	0.97537	0.999731	23129	0
NM_018960	3	0.024689	0.061933	0.963153	1520	3	0.97531	0.97536	0.999731	23128	0
NM_201999	3	0.024695	0.061946	0.963153	1521	2	0.62465	0.62663	0.999731	14801	1
NM_030758	3	0.024699	0.061954	0.963153	1522	2	0.72691	0.72701	0.999731	17133	0
NM_181508	3	0.024749	0.062078	0.963153	1523	2	0.84571	0.84572	0.999731	19910	0
NM_001009611	2	0.024753	0.062085	0.963153	1524	1	0.57986	0.58663	0.999731	13843	0
NM_001897	3	0.024755	0.06209	0.963153	1525	3	0.97525	0.97529	0.999731	23127	0
NM_001253902	3	0.024779	0.062146	0.963153	1526	2	0.50946	0.52935	0.999731	12533	1
NM_002898	3	0.024802	0.062207	0.963153	1527	3	0.9752	0.97525	0.999731	23126	0
NM_199298	3	0.024809	0.062224	0.963153	1528	3	0.97519	0.97524	0.999731	23125	0
NM_032611	3	0.02482	0.062254	0.963153	1529	3	0.97518	0.97523	0.999731	23124	0
NM_032314	3	0.02482	0.062254	0.963153	1530	3	0.97518	0.97523	0.999731	23123	0
NM_001161442	3	0.024821	0.062257	0.963153	1531	2	0.47411	0.50273	0.999731	11886	1
NM_006929	3	0.024902	0.062435	0.963153	1532	2	0.20318	0.31133	0.995378	7384	1
NM_001111270	3	0.024931	0.062499	0.963153	1533	2	0.84614	0.84611	0.999731	19919	0
NM_033015	3	0.024946	0.062539	0.963153	1534	3	0.97108	0.97118	0.999731	23024	0
NM_016438	3	0.024947	0.062541	0.963153	1535	2	0.026247	0.065533	0.974167	1594	1
NM_032013	3	0.024968	0.062582	0.963153	1536	2	0.19034	0.2944	0.995378	6958	1
NM_023934	3	0.024975	0.062597	0.963153	1537	3	0.9362	0.93618	0.999731	22167	0
NM_004086	3	0.025004	0.062678	0.963153	1538	2	0.74551	0.74553	0.999731	17589	0
NM_145870	3	0.025009	0.062693	0.963153	1539	3	0.97499	0.97504	0.999731	23121	0
NM_001281783	3	0.025031	0.062741	0.963153	1540	2	0.46026	0.49243	0.999731	11647	1
NM_016426	3	0.025073	0.062847	0.963153	1541	1	0.043281	0.093118	0.977105	2236	2
NM_001173516	3	0.025099	0.062909	0.963153	1542	3	0.92975	0.92981	0.999731	21999	0
NM_001195059	3	0.025115	0.062952	0.963153	1543	1	0.69445	0.69462	0.999731	16367	0
NM_003833	3	0.025134	0.062996	0.963153	1544	3	0.97487	0.97492	0.999731	23120	0
NM_016458	3	0.025157	0.063048	0.963153	1545	2	0.6173	0.61993	0.999731	14640	1
NM_004186	3	0.025179	0.063109	0.963153	1546	2	0.72412	0.72427	0.999731	17058	0
NM_012402	3	0.025199	0.063166	0.963153	1547	1	0.60268	0.60669	0.999731	14324	1
NM_001080419	3	0.0252	0.063167	0.963153	1548	3	0.9748	0.97488	0.999731	23119	0
NM_024860	3	0.025216	0.063198	0.963153	1549	2	0.52121	0.53847	0.999731	12734	1
NM_024907	3	0.02523	0.063228	0.963153	1550	2	0.10965	0.18643	0.995378	4424	1
NM_014781	3	0.025241	0.063256	0.963153	1551	1	0.73771	0.73778	0.999731	17394	0
NM_007310	3	0.025274	0.063332	0.963153	1552	2	0.90181	0.90174	0.999731	21229	0
NM_004718	3	0.025283	0.063356	0.963153	1553	2	0.62209	0.62424	0.999731	14743	1
NM_001080508	3	0.025311	0.063415	0.963153	1554	2	0.67518	0.67536	0.999731	15933	0
NM_001243079	3	0.025313	0.063419	0.963153	1555	3	0.97469	0.97476	0.999731	23118	0
NM_144721	3	0.025317	0.063429	0.963153	1556	3	0.97468	0.97476	0.999731	23117	0
NM_001135048	3	0.025325	0.063449	0.963153	1557	1	0.79971	0.79961	0.999731	18839	0
NM_003358	3	0.025354	0.06351	0.963153	1558	3	0.97465	0.97472	0.999731	23116	0
NM_178034	3	0.025367	0.063541	0.963153	1559	2	0.54733	0.55935	0.999731	13216	1
NM_007156	3	0.025409	0.063632	0.963153	1560	1	0.19755	0.30393	0.995378	7187	1
NM_024871	3	0.025443	0.063717	0.963153	1561	3	0.96848	0.96864	0.999731	22961	0
NM_001100829	3	0.025446	0.063722	0.963153	1562	3	0.97455	0.97462	0.999731	23112	0
NM_182715	3	0.025457	0.063741	0.963153	1563	3	0.97454	0.97461	0.999731	23111	0
NM_016446	3	0.025473	0.063776	0.963153	1564	3	0.93125	0.93127	0.999731	22031	0
NM_007110	3	0.025493	0.063834	0.963153	1565	2	0.78389	0.78383	0.999731	18466	0
NM_001145113	3	0.025502	0.063859	0.963153	1566	2	0.066434	0.12623	0.977105	3058	1
NM_001030	3	0.025535	0.063933	0.963153	1567	2	0.28739	0.3778	0.995378	8994	1
NM_032223	3	0.025553	0.063979	0.963153	1568	3	0.97445	0.97451	0.999731	23110	0
NM_017966	3	0.025576	0.064036	0.963153	1569	2	0.31013	0.3918	0.995378	9317	1
NM_001244735	3	0.025609	0.06411	0.963153	1570	3	0.97439	0.97446	0.999731	23109	0
NM_001114618	3	0.025624	0.064146	0.963153	1571	3	0.97438	0.97444	0.999731	23108	0
NM_020242	3	0.02566	0.06423	0.963153	1572	2	0.47907	0.50636	0.999731	11979	1
NM_138342	3	0.025678	0.064277	0.963153	1573	3	0.97432	0.97439	0.999731	23107	0
NM_016525	3	0.025679	0.064281	0.963153	1574	2	0.73246	0.73253	0.999731	17267	0
NM_174931	3	0.025683	0.06429	0.963153	1575	3	0.97432	0.97438	0.999731	23105	0
NM_025153	3	0.025702	0.064335	0.963153	1576	1	0.58486	0.59096	0.999731	13930	1
NM_001080409	3	0.025723	0.064381	0.963153	1577	2	0.022385	0.056463	0.958897	1395	1
NM_001167821	3	0.025744	0.064441	0.963153	1578	2	0.42219	0.46542	0.999731	11029	1
NM_003172	3	0.025756	0.064472	0.963153	1579	3	0.97424	0.97431	0.999731	23104	0
NM_001037164	3	0.02576	0.064477	0.963153	1580	2	0.88855	0.88838	0.999731	20955	0
NM_031210	3	0.02579	0.064559	0.963153	1581	2	0.90544	0.90538	0.999731	21404	0
NM_016335	3	0.025804	0.064599	0.963153	1582	2	0.42836	0.4697	0.999731	11129	1
NM_031480	3	0.025812	0.064617	0.963153	1583	2	0.14964	0.24063	0.995378	5685	1
NM_001174150	3	0.025828	0.064651	0.963153	1584	1	0.42968	0.4706	0.999731	11156	1
NM_001005288	3	0.025866	0.064742	0.963153	1585	3	0.97413	0.97419	0.999731	23102	0
NM_001142319	3	0.025869	0.064756	0.963153	1586	3	0.97413	0.97419	0.999731	23101	0
NM_015258	3	0.02587	0.064759	0.963153	1587	2	0.81155	0.81151	0.999731	19111	0
NM_012166	3	0.025873	0.064763	0.963153	1588	3	0.97413	0.97419	0.999731	23100	0
NM_080416	3	0.025899	0.064825	0.963153	1589	3	0.9741	0.97416	0.999731	23099	0
NM_001164434	3	0.025908	0.06485	0.963153	1590	2	0.12766	0.21094	0.995378	5000	1
NM_001384	3	0.02591	0.064854	0.963153	1591	3	0.97409	0.97415	0.999731	23098	0
NM_001098819	3	0.025912	0.06486	0.963153	1592	1	0.82876	0.82881	0.999731	19507	0
NM_001258320	3	0.02594	0.06493	0.963153	1593	3	0.97406	0.97413	0.999731	23097	0
NM_021958	3	0.026038	0.065145	0.963153	1594	1	0.036608	0.083419	0.977105	2003	1
NM_018019	3	0.026079	0.065239	0.963153	1595	2	0.31942	0.39758	0.995378	9458	1
NM_001170689	3	0.026083	0.06525	0.963153	1596	3	0.97392	0.97398	0.999731	23095	0
NM_001143837	3	0.026101	0.0653	0.963153	1597	2	0.91711	0.91718	0.999731	21694	0
NM_032147	3	0.026105	0.065313	0.963153	1598	3	0.97389	0.97396	0.999731	23094	0
NM_198798	3	0.026122	0.065356	0.963153	1599	2	0.86029	0.86029	0.999731	20257	0
NM_014761	3	0.026128	0.065366	0.963153	1600	3	0.97387	0.97394	0.999731	23093	0
NM_001010873	3	0.026153	0.065427	0.963153	1601	2	0.46486	0.49583	0.999731	11729	1
NM_002037	3	0.026164	0.065448	0.963153	1602	2	0.11541	0.19427	0.995378	4618	1
NM_015266	3	0.026173	0.065468	0.963153	1603	3	0.97383	0.9739	0.999731	23092	0
NM_022493	3	0.026184	0.065492	0.963153	1604	3	0.97382	0.97389	0.999731	23091	0
NM_153365	3	0.026206	0.065538	0.963153	1605	2	0.84765	0.8476	0.999731	19953	0
NM_174945	3	0.026213	0.065554	0.963153	1606	2	0.89042	0.89028	0.999731	20997	0
NM_001010858	3	0.026214	0.065559	0.963153	1607	3	0.97379	0.97386	0.999731	23089	0
NM_017447	3	0.026247	0.065638	0.963153	1608	2	0.79064	0.79059	0.999731	18629	0
NM_014207	3	0.026252	0.065646	0.963153	1609	3	0.97375	0.97382	0.999731	23088	0
NM_001166400	3	0.026278	0.06571	0.963153	1610	3	0.97372	0.97379	0.999731	23087	0
NM_001204406	3	0.026289	0.06574	0.963153	1611	2	0.49686	0.51973	0.999731	12316	1
NM_173553	3	0.026324	0.06582	0.963153	1612	3	0.97368	0.97375	0.999731	23086	0
NM_012342	3	0.026331	0.065836	0.963153	1613	1	0.33293	0.40611	0.995378	9673	1
NM_001242901	3	0.02634	0.065858	0.963153	1614	2	0.6928	0.69298	0.999731	16322	0
NM_020640	3	0.026346	0.065876	0.963153	1615	3	0.97365	0.97373	0.999731	23085	0
NM_001128203	3	0.026373	0.065936	0.963153	1616	2	0.88882	0.88866	0.999731	20959	0
NM_013347	3	0.026377	0.065941	0.963153	1617	2	0.25079	0.35581	0.995378	8460	1
NM_004780	3	0.026418	0.066041	0.963153	1618	3	0.97358	0.97366	0.999731	23084	0
NM_032538	3	0.026457	0.066115	0.963153	1619	1	0.18902	0.2927	0.995378	6923	2
NM_030949	3	0.026482	0.066185	0.963153	1620	2	0.52329	0.5401	0.999731	12784	1
NM_025137	3	0.026513	0.066254	0.963153	1621	3	0.97349	0.97357	0.999731	23083	0
NM_032167	3	0.026549	0.06634	0.963153	1622	2	0.44944	0.48455	0.999731	11487	1
NM_006072	3	0.026572	0.066391	0.963153	1623	2	0.67292	0.67314	0.999731	15873	0
NM_004700	3	0.026583	0.066419	0.963153	1624	2	0.1967	0.30283	0.995378	7166	1
NM_001080432	3	0.026587	0.066428	0.963153	1625	3	0.96085	0.96104	0.999731	22750	0
NM_001199830	3	0.026609	0.066486	0.963153	1626	3	0.94253	0.94249	0.999731	22321	0
NM_015076	3	0.026625	0.066519	0.963153	1627	3	0.95968	0.95987	0.999731	22718	0
NM_147183	3	0.026631	0.066534	0.963153	1628	3	0.97337	0.97345	0.999731	23082	0
NM_001130714	3	0.026669	0.066625	0.963153	1629	3	0.97333	0.9734	0.999731	23081	0
NM_003792	3	0.026692	0.066673	0.963153	1630	3	0.94225	0.9422	0.999731	22315	0
NM_001261826	3	0.026707	0.066705	0.963153	1631	3	0.96224	0.96243	0.999731	22787	0
NM_001135998	3	0.026709	0.066708	0.963153	1632	2	0.78606	0.78598	0.999731	18514	0
NM_173474	3	0.026729	0.06676	0.963153	1633	2	0.37913	0.43606	0.998494	10361	1
NM_005702	3	0.026753	0.066813	0.963153	1634	3	0.97325	0.97331	0.999731	23078	0
NM_001184924	3	0.026753	0.066813	0.963153	1635	3	0.97325	0.97331	0.999731	23079	0
NM_172349	3	0.026768	0.066846	0.963153	1636	3	0.97323	0.97329	0.999731	23077	0
NM_080725	3	0.026787	0.066881	0.963153	1637	3	0.97321	0.97328	0.999731	23076	0
NM_175058	3	0.026789	0.066886	0.963153	1638	3	0.93432	0.93433	0.999731	22112	0
NM_152548	3	0.026797	0.0669	0.963153	1639	3	0.9732	0.97327	0.999731	23075	0
NM_001202550	3	0.02681	0.06693	0.963153	1640	3	0.97319	0.97326	0.999731	23074	0
NM_006609	3	0.02682	0.066952	0.963153	1641	2	0.71136	0.71153	0.999731	16744	0
NM_001199232	3	0.026834	0.06699	0.963153	1642	2	0.77005	0.77	0.999731	18130	0
NM_015364	3	0.026842	0.067003	0.963153	1643	2	0.6391	0.64004	0.999731	15094	1
NM_030755	3	0.026858	0.067032	0.963153	1644	3	0.97314	0.97322	0.999731	23073	0
NM_003362	3	0.026876	0.067073	0.963153	1645	2	0.82269	0.82273	0.999731	19372	0
NM_032504	3	0.026887	0.067101	0.963153	1646	3	0.96306	0.96322	0.999731	22810	0
NM_032718	3	0.026918	0.067167	0.963153	1647	1	0.80713	0.80699	0.999731	19012	0
NM_013388	3	0.026925	0.067184	0.963153	1648	2	0.40708	0.45496	0.999731	10784	1
NM_001100159	3	0.026944	0.067221	0.963153	1649	3	0.97306	0.97312	0.999731	23072	0
NM_080656	3	0.02696	0.067254	0.963153	1650	1	0.14772	0.23808	0.995378	5632	1
NM_001002841	3	0.026975	0.067286	0.963153	1651	3	0.97303	0.97309	0.999731	23071	0
NM_001244134	3	0.026985	0.067313	0.963153	1652	2	0.90909	0.90904	0.999731	21503	0
NM_004617	3	0.027008	0.067365	0.963153	1653	2	0.37133	0.43094	0.997448	10250	1
NM_199355	3	0.027013	0.067381	0.963153	1654	3	0.97299	0.97306	0.999731	23070	0
NM_001127899	3	0.027044	0.067452	0.963153	1655	3	0.97296	0.97303	0.999731	23069	0
NM_144696	3	0.027059	0.06749	0.963153	1656	3	0.97294	0.97301	0.999731	23068	0
NM_017439	3	0.027071	0.067515	0.963153	1657	3	0.97293	0.973	0.999731	23067	0
NM_025245	3	0.027086	0.067543	0.963153	1658	1	0.15544	0.24827	0.995378	5873	2
NM_001004735	3	0.027099	0.067568	0.963153	1659	2	0.84497	0.84497	0.999731	19896	0
NM_020703	3	0.027128	0.067639	0.963153	1660	1	0.52082	0.53817	0.999731	12725	1
NM_001284264	3	0.027144	0.067683	0.963153	1661	3	0.97286	0.97293	0.999731	23066	0
NM_004162	3	0.027144	0.067684	0.963153	1662	2	0.0054739	0.014793	0.881042	386	1
NM_001033053	3	0.027159	0.067722	0.963153	1663	3	0.97284	0.97292	0.999731	23065	0
NM_177477	3	0.02717	0.067744	0.963153	1664	1	0.036192	0.082813	0.977105	1988	1
NM_174981	3	0.02719	0.067797	0.963153	1665	2	0.70892	0.70911	0.999731	16685	0
NM_005655	3	0.027205	0.067831	0.963153	1666	2	0.44282	0.47982	0.999731	11376	1
NM_152835	3	0.027206	0.067832	0.963153	1667	3	0.97279	0.97287	0.999731	23064	0
NM_017592	3	0.027211	0.067848	0.963153	1668	2	0.19541	0.30114	0.995378	7120	1
NM_001282166	3	0.02722	0.067869	0.963153	1669	2	0.82027	0.82033	0.999731	19309	0
NM_001201539	3	0.027267	0.067986	0.963153	1670	3	0.97273	0.97281	0.999731	23063	0
NM_001278276	3	0.027279	0.068012	0.963153	1671	3	0.97272	0.9728	0.999731	23062	0
NM_001083112	3	0.02731	0.068083	0.963153	1672	3	0.97269	0.97277	0.999731	23061	0
NM_014907	3	0.027319	0.068104	0.963153	1673	3	0.94791	0.94799	0.999731	22428	0
NM_006497	3	0.027337	0.068146	0.963153	1674	1	0.21275	0.3237	0.995378	7688	1
NM_004422	3	0.027417	0.068326	0.963153	1675	2	0.43129	0.47171	0.999731	11187	1
NM_201402	3	0.027421	0.068334	0.963153	1676	1	0.14795	0.2384	0.995378	5640	1
NM_006003	3	0.027442	0.068387	0.963153	1677	3	0.97256	0.97264	0.999731	23060	0
NM_001159576	3	0.027448	0.068405	0.963153	1678	2	0.59551	0.60034	0.999731	14173	1
NM_001099773	2	0.027449	0.068405	0.963153	1679	1	0.52021	0.53769	0.999731	12714	1
NM_016490	3	0.027463	0.068443	0.963153	1680	2	0.055343	0.11045	0.977105	2647	1
NM_002156	3	0.027463	0.068443	0.963153	1681	2	0.1386	0.22576	0.995378	5358	1
NM_012406	3	0.027481	0.068475	0.963153	1682	3	0.97252	0.97261	0.999731	23059	0
NM_001014830	3	0.027488	0.068497	0.963153	1683	3	0.97251	0.9726	0.999731	23058	0
NM_003876	3	0.027494	0.068506	0.963153	1684	2	0.0073011	0.019608	0.894755	512	1
NM_033196	3	0.027509	0.068547	0.963153	1685	2	0.7921	0.79201	0.999731	18664	0
NM_144662	3	0.027547	0.068637	0.963153	1686	1	0.33729	0.40888	0.995771	9743	1
NM_002467	3	0.027562	0.068677	0.963153	1687	3	0.97244	0.97253	0.999731	23057	0
NM_003334	3	0.027593	0.068744	0.963153	1688	2	0.65152	0.65192	0.999731	15366	1
NM_005416	3	0.0276	0.068762	0.963153	1689	2	0.50336	0.52473	0.999731	12427	1
NM_001083604	3	0.027636	0.068837	0.963153	1690	3	0.97236	0.97246	0.999731	23056	0
NM_006076	3	0.027639	0.06884	0.963153	1691	2	0.81896	0.81896	0.999731	19281	0
NM_007219	3	0.027672	0.068919	0.963153	1692	1	0.042814	0.092474	0.977105	2218	2
NM_002124	3	0.027679	0.068935	0.963153	1693	3	0.97232	0.97242	0.999731	23055	0
NM_033316	3	0.027683	0.068946	0.963153	1694	3	0.97232	0.97242	0.999731	23054	0
NM_178460	3	0.027699	0.06899	0.963153	1695	3	0.9723	0.9724	0.999731	23053	0
NM_001284353	3	0.027707	0.069005	0.963153	1696	3	0.97229	0.97239	0.999731	23052	0
NM_033547	3	0.027714	0.069018	0.963153	1697	1	0.64459	0.64529	0.999731	15198	1
NM_014573	3	0.02775	0.069105	0.963153	1698	3	0.97225	0.97235	0.999731	23051	0
NM_001012965	3	0.027756	0.069122	0.963153	1699	2	0.65584	0.65613	0.999731	15464	1
NM_001004470	3	0.027798	0.069218	0.963153	1700	1	0.42657	0.46845	0.999731	11097	1
NM_001830	3	0.027807	0.069239	0.963153	1701	3	0.93388	0.9339	0.999731	22101	0
NM_001184702	3	0.027824	0.069276	0.963153	1702	3	0.97218	0.97228	0.999731	23047	0
NM_004538	2	0.027884	0.069399	0.963153	1703	2	0.97212	0.97221	0.999731	23046	0
NM_032536	3	0.027899	0.069429	0.963153	1704	3	0.9721	0.9722	0.999731	23045	0
NM_002405	3	0.027924	0.069489	0.963153	1705	2	0.68336	0.68357	0.999731	16108	0
NM_000983	3	0.02795	0.069553	0.963153	1706	3	0.97205	0.97214	0.999731	23044	0
NM_001284347	3	0.027965	0.069589	0.963153	1707	3	0.97203	0.97212	0.999731	23043	0
NM_032924	3	0.027965	0.069589	0.963153	1708	1	0.40976	0.45681	0.999731	10828	1
NM_031313	3	0.028007	0.0697	0.963153	1709	1	0.16672	0.26338	0.995378	6227	2
NM_001969	3	0.028029	0.069749	0.963153	1710	2	0.9088	0.90876	0.999731	21496	0
NM_002189	3	0.028091	0.069898	0.963153	1711	3	0.96956	0.96968	0.999731	22991	0
NM_015465	3	0.028099	0.06992	0.963153	1712	3	0.9719	0.972	0.999731	23041	0
NM_006407	3	0.028107	0.069938	0.963153	1713	3	0.97189	0.97199	0.999731	23040	0
NM_001258012	3	0.028113	0.069954	0.963153	1714	3	0.97189	0.97199	0.999731	23039	0
NM_020962	3	0.028175	0.070085	0.963153	1715	2	0.40808	0.45566	0.999731	10802	1
NM_199285	3	0.028217	0.070191	0.963153	1716	2	0.89227	0.89216	0.999731	21038	0
NM_001004705	3	0.028229	0.070226	0.963153	1717	2	0.31856	0.39705	0.995378	9442	1
NM_153453	3	0.028241	0.070257	0.963153	1718	3	0.97176	0.97186	0.999731	23038	0
NM_001010862	3	0.028245	0.070264	0.963153	1719	2	0.75825	0.75817	0.999731	17854	0
NM_032287	3	0.028259	0.070305	0.963153	1720	2	0.75307	0.75295	0.999731	17739	0
NM_001282848	3	0.028283	0.070368	0.963153	1721	3	0.95747	0.95769	0.999731	22658	0
NM_005617	3	0.028299	0.070404	0.963153	1722	3	0.9717	0.97181	0.999731	23037	0
NM_198541	3	0.0283	0.070406	0.963153	1723	2	0.75628	0.75619	0.999731	17809	0
NM_014016	3	0.028309	0.070423	0.963153	1724	3	0.97169	0.9718	0.999731	23036	0
NM_001005480	3	0.028325	0.070458	0.963153	1725	3	0.97168	0.97178	0.999731	23035	0
NM_021088	3	0.02833	0.070472	0.963153	1726	2	0.31435	0.3944	0.995378	9380	1
NM_053026	3	0.028342	0.070499	0.963153	1727	3	0.95128	0.95141	0.999731	22506	0
NM_003592	3	0.028376	0.070576	0.963153	1728	2	0.57674	0.58396	0.999731	13780	1
NM_001197216	3	0.028384	0.070595	0.963153	1729	1	0.88047	0.88034	0.999731	20764	0
NM_001134453	3	0.028415	0.070671	0.963153	1730	3	0.92408	0.92415	0.999731	21858	0
NM_001420	3	0.028426	0.070705	0.963153	1731	2	0.87598	0.87598	0.999731	20652	0
NM_014723	3	0.02848	0.070819	0.963153	1732	3	0.97152	0.97162	0.999731	23034	0
NM_001253915	3	0.028488	0.07084	0.963153	1733	3	0.97151	0.97161	0.999731	23033	0
NM_002919	3	0.028496	0.070858	0.963153	1734	3	0.9715	0.97161	0.999731	23032	0
NM_016582	3	0.02851	0.070888	0.963153	1735	3	0.97044	0.97054	0.999731	23012	0
NM_031307	3	0.028539	0.070955	0.963153	1736	2	0.56538	0.5743	0.999731	13560	1
NM_001204174	3	0.028552	0.070987	0.963153	1737	1	0.68666	0.68683	0.999731	16190	0
NM_032328	3	0.028571	0.071031	0.963153	1738	3	0.97143	0.97153	0.999731	23031	0
NM_014811	3	0.028591	0.07108	0.963153	1739	3	0.97141	0.97151	0.999731	23030	0
NM_001173463	3	0.028593	0.071082	0.963153	1740	2	0.80872	0.80867	0.999731	19045	0
NM_020659	3	0.028593	0.071083	0.963153	1741	1	0.68637	0.68654	0.999731	16181	0
NM_018640	3	0.028624	0.071156	0.963153	1742	2	0.62283	0.62493	0.999731	14755	1
NM_001114132	3	0.028635	0.071183	0.963153	1743	2	0.79326	0.79318	0.999731	18696	0
NM_001199692	3	0.028639	0.071195	0.963153	1744	3	0.95708	0.95728	0.999731	22652	0
NM_019067	3	0.02867	0.071272	0.963153	1745	3	0.94874	0.94885	0.999731	22447	0
NM_003187	3	0.028671	0.071273	0.963153	1746	3	0.97133	0.97145	0.999731	23029	0
NM_001286606	3	0.028677	0.071295	0.963153	1747	2	0.61267	0.61571	0.999731	14535	1
NM_001276479	3	0.028679	0.0713	0.963153	1748	3	0.97132	0.97144	0.999731	23028	0
NM_001142623	3	0.028761	0.07147	0.963153	1749	2	0.79653	0.79648	0.999731	18772	0
NM_020384	3	0.028787	0.071537	0.963153	1750	2	0.80501	0.80487	0.999731	18959	0
NM_032552	3	0.028818	0.071608	0.963153	1751	2	0.041512	0.090589	0.977105	2176	1
NM_174855	3	0.028827	0.071628	0.963153	1752	3	0.97117	0.97129	0.999731	23027	0
NM_018947	3	0.028845	0.071666	0.963153	1753	2	0.29914	0.38496	0.995378	9163	1
NM_006243	3	0.028855	0.071691	0.963153	1754	3	0.97114	0.97125	0.999731	23026	0
NM_003022	3	0.028859	0.071706	0.963153	1755	3	0.97114	0.97124	0.999731	23025	0
NM_004374	3	0.028886	0.071765	0.963153	1756	3	0.94479	0.9448	0.999731	22372	0
NM_001135156	3	0.028928	0.071863	0.963153	1758	2	0.69786	0.69803	0.999731	16435	0
NM_001261823	3	0.028928	0.071861	0.963153	1757	3	0.97107	0.97117	0.999731	23023	0
NM_003941	3	0.028935	0.071881	0.963153	1759	2	0.74452	0.74453	0.999731	17563	0
NM_002377	3	0.029005	0.072051	0.963153	1760	2	0.80284	0.80273	0.999731	18911	0
NM_001017404	3	0.029077	0.072211	0.963153	1761	3	0.97092	0.97102	0.999731	23022	0
NM_016248	3	0.029091	0.07224	0.963153	1762	2	0.71503	0.71521	0.999731	16835	0
NM_018420	3	0.029096	0.072252	0.963153	1763	1	0.12356	0.20538	0.995378	4865	1
NM_005268	3	0.02913	0.072318	0.963153	1764	2	0.13104	0.2155	0.995378	5108	1
NM_001032279	3	0.029138	0.072343	0.963153	1765	3	0.97042	0.97052	0.999731	23011	0
NM_001142545	3	0.029149	0.072367	0.963153	1766	3	0.97085	0.97095	0.999731	23021	0
NM_173847	3	0.029209	0.072501	0.963153	1767	2	0.81407	0.81402	0.999731	19171	0
NM_014631	3	0.029216	0.072522	0.963153	1768	3	0.96486	0.96498	0.999731	22850	0
NM_001008777	3	0.029221	0.072533	0.963153	1769	2	0.84364	0.84363	0.999731	19864	0
NM_001242757	3	0.02924	0.072579	0.963153	1770	2	0.90618	0.90614	0.999731	21425	0
NM_207116	3	0.029263	0.072634	0.963153	1772	2	0.37258	0.43178	0.997448	10270	1
NM_001270484	3	0.029263	0.072633	0.963153	1771	1	0.77712	0.77706	0.999731	18307	0
NM_153219	3	0.029279	0.07267	0.963153	1773	3	0.96757	0.96773	0.999731	22934	0
NM_014018	3	0.029332	0.072795	0.963153	1774	3	0.97067	0.97077	0.999731	23019	0
NM_001879	3	0.029352	0.072846	0.963153	1775	3	0.97065	0.97075	0.999731	23018	0
NM_001167822	3	0.029389	0.072927	0.963153	1776	1	0.18153	0.283	0.995378	6703	2
NM_001130045	3	0.029413	0.07298	0.963153	1777	2	0.27527	0.37045	0.995378	8808	1
NM_001286188	3	0.02943	0.073018	0.963153	1778	1	0.048273	0.10032	0.977105	2412	2
NM_177536	3	0.029441	0.073045	0.963153	1779	3	0.97056	0.97066	0.999731	23016	0
NM_031847	3	0.029468	0.073103	0.963153	1780	2	0.88189	0.88174	0.999731	20797	0
NM_001242897	3	0.029472	0.073116	0.963153	1781	2	0.42621	0.46819	0.999731	11093	1
NM_138639	3	0.029498	0.073167	0.963153	1782	3	0.9705	0.9706	0.999731	23015	0
NM_001277091	3	0.029514	0.073202	0.963153	1783	1	0.59839	0.60288	0.999731	14229	1
NM_021833	3	0.029515	0.073203	0.963153	1784	3	0.97049	0.97059	0.999731	23014	0
NM_001173524	3	0.029538	0.073256	0.963153	1785	2	0.68786	0.68798	0.999731	16215	0
NM_001099415	3	0.029543	0.073266	0.963153	1786	3	0.97046	0.97056	0.999731	23013	0
NM_031925	3	0.029598	0.07339	0.963153	1787	1	0.48855	0.51342	0.999731	12148	1
NM_012263	3	0.029601	0.073398	0.963153	1788	2	0.44204	0.47927	0.999731	11359	1
NM_017850	3	0.02964	0.073482	0.963153	1789	1	0.50978	0.52959	0.999731	12538	1
NM_001006665	3	0.029641	0.073485	0.963153	1790	2	0.79308	0.79299	0.999731	18690	0
NM_014931	3	0.029681	0.073578	0.963153	1791	1	0.027295	0.067952	0.975694	1649	1
NM_002815	3	0.029704	0.073625	0.963153	1792	3	0.96535	0.96549	0.999731	22862	0
NM_000988	3	0.029712	0.073644	0.963153	1793	2	0.051805	0.10532	0.977105	2538	1
NM_001142966	3	0.029723	0.073672	0.963153	1794	2	0.90651	0.90647	0.999731	21433	0
NM_015946	3	0.029727	0.073681	0.963153	1795	3	0.97027	0.97038	0.999731	23010	0
NM_133468	3	0.029731	0.073688	0.963153	1796	3	0.97027	0.97037	0.999731	23009	0
NM_022776	3	0.029739	0.073707	0.963153	1797	3	0.97026	0.97036	0.999731	23008	0
NM_001098616	3	0.029756	0.073741	0.963153	1798	3	0.97024	0.97035	0.999731	23007	0
NM_001168216	3	0.029765	0.073764	0.963153	1799	2	0.87805	0.87798	0.999731	20702	0
NM_001160331	3	0.02978	0.073794	0.963153	1800	3	0.97022	0.97032	0.999731	23006	0
NM_001042682	3	0.029807	0.073852	0.963153	1801	2	0.90181	0.90174	0.999731	21295	0
NM_001271865	3	0.029842	0.073942	0.963153	1802	3	0.97016	0.97027	0.999731	23004	0
NM_002795	3	0.029849	0.073954	0.963153	1803	2	0.91725	0.91732	0.999731	21695	0
NM_178518	3	0.029875	0.074014	0.963153	1804	3	0.97013	0.97023	0.999731	23002	0
NM_058181	3	0.029912	0.0741	0.963153	1805	3	0.97009	0.9702	0.999731	23001	0
NM_001195082	3	0.029932	0.074144	0.963153	1806	3	0.97007	0.97018	0.999731	23000	0
NM_025220	3	0.029973	0.074227	0.963153	1807	2	0.068389	0.129	0.977105	3125	1
NM_203497	3	0.029974	0.074228	0.963153	1808	3	0.97003	0.97014	0.999731	22999	0
NM_025214	3	0.029989	0.074264	0.963153	1809	3	0.9445	0.9445	0.999731	22364	0
NM_006848	3	0.030007	0.074309	0.963153	1810	3	0.96999	0.97012	0.999731	22997	0
NM_001098206	3	0.030016	0.074333	0.963153	1811	1	0.030259	0.074054	0.977105	1780	2
NM_000496	3	0.030044	0.074395	0.963153	1812	3	0.96996	0.97008	0.999731	22996	0
NM_013404	3	0.030068	0.074451	0.963153	1813	3	0.95996	0.96015	0.999731	22725	0
NM_152397	3	0.030076	0.07447	0.963153	1814	2	0.24182	0.35054	0.995378	8326	1
NM_001143775	3	0.030132	0.074604	0.963153	1815	2	0.083249	0.14994	0.985494	3603	1
NM_001135820	3	0.030141	0.074631	0.963153	1816	1	0.90181	0.90174	0.999731	21370	0
NM_032374	3	0.030179	0.074712	0.963153	1817	2	0.52011	0.53762	0.999731	12712	1
NM_182488	3	0.030183	0.074721	0.963153	1818	1	0.63355	0.63485	0.999731	14974	1
NM_006695	3	0.030225	0.074823	0.963153	1819	2	0.30334	0.38757	0.995378	9222	1
NM_012308	3	0.030227	0.074828	0.963153	1820	2	0.76718	0.76714	0.999731	18058	0
NM_181607	3	0.030243	0.074874	0.963153	1821	3	0.95058	0.95068	0.999731	22492	0
NM_019004	3	0.030251	0.07489	0.963153	1822	2	0.18455	0.2869	0.995378	6791	1
NM_000788	3	0.030263	0.07492	0.963153	1823	3	0.96974	0.96986	0.999731	22995	0
NM_138368	3	0.030267	0.074934	0.963153	1824	2	0.63417	0.63542	0.999731	14990	1
NM_145644	3	0.030283	0.074962	0.963153	1825	2	0.63397	0.63524	0.999731	14983	1
NM_013389	3	0.03035	0.075106	0.963153	1826	2	0.099185	0.17211	0.993723	4107	1
NM_004672	3	0.030366	0.075142	0.963153	1827	3	0.96963	0.96975	0.999731	22992	0
NM_016353	3	0.030392	0.075203	0.963153	1828	1	0.17865	0.27916	0.995378	6611	1
NM_139278	3	0.030394	0.07521	0.963153	1829	2	0.85037	0.85032	0.999731	20021	0
NM_031370	3	0.030426	0.075279	0.963153	1830	3	0.94783	0.9479	0.999731	22426	0
NM_170662	3	0.030434	0.075297	0.963153	1831	2	0.13663	0.22306	0.995378	5293	1
NM_052865	3	0.030482	0.075395	0.963153	1832	2	0.28494	0.37631	0.995378	8960	1
NM_001195654	3	0.030518	0.075481	0.963153	1833	2	0.89329	0.89317	0.999731	21065	0
NM_001012715	3	0.030522	0.075494	0.963153	1834	2	0.83228	0.8323	0.999731	19587	0
NM_001200029	1	0.030535	0.075524	0.963153	1835	1	0.96947	0.96959	0.999731	22990	0
NM_006240	3	0.030559	0.075582	0.963153	1836	1	0.15405	0.24647	0.995378	5831	2
NM_001199081	3	0.030562	0.075585	0.963153	1837	2	0.061411	0.1191	0.977105	2866	1
NM_001290693	3	0.030583	0.075628	0.963153	1838	3	0.96942	0.96954	0.999731	22988	0
NM_001243228	3	0.030601	0.07566	0.963153	1839	2	0.022637	0.057043	0.959139	1411	1
NM_002391	2	0.030617	0.075696	0.963153	1840	1	0.15488	0.24753	0.995378	5852	1
NM_012138	3	0.030643	0.075755	0.963153	1841	2	0.32445	0.40075	0.995378	9537	1
NM_172130	2	0.030645	0.075757	0.963153	1842	1	0.22482	0.33937	0.995378	8046	1
NM_001174147	3	0.030667	0.075814	0.963153	1843	3	0.96933	0.96947	0.999731	22987	0
NM_001018024	3	0.030674	0.075838	0.963153	1844	2	0.17629	0.27602	0.995378	6542	1
NM_001256014	3	0.030754	0.076034	0.963153	1845	2	0.80714	0.807	0.999731	19013	0
NM_014851	3	0.030768	0.076055	0.963153	1846	3	0.92053	0.92061	0.999731	21773	0
NM_002715	3	0.030775	0.076072	0.963153	1847	3	0.96922	0.96937	0.999731	22985	0
NM_020983	3	0.030802	0.076137	0.963153	1848	3	0.94315	0.94313	0.999731	22327	0
NM_014139	3	0.03081	0.07615	0.963153	1849	2	0.32422	0.4006	0.995378	9531	1
NM_001170726	3	0.030835	0.076214	0.963153	1850	2	0.79894	0.79885	0.999731	18823	0
NM_032825	3	0.030855	0.076268	0.963153	1851	3	0.96914	0.96929	0.999731	22984	0
NM_001076786	3	0.030893	0.076361	0.963153	1852	3	0.96911	0.96926	0.999731	22982	0
NM_001160708	3	0.030907	0.076393	0.963153	1853	2	0.50667	0.52723	0.999731	12477	1
NM_001243597	3	0.030922	0.07643	0.963153	1854	3	0.96908	0.96924	0.999731	22981	0
NM_207344	3	0.030936	0.07646	0.963153	1855	2	0.60212	0.6062	0.999731	14317	1
NM_207408	2	0.030953	0.076494	0.963153	1856	1	0.7734	0.77339	0.999731	18214	0
NM_181581	3	0.03096	0.076511	0.963153	1857	3	0.96904	0.9692	0.999731	22980	0
NM_002313	3	0.030977	0.076551	0.963153	1858	2	0.66728	0.66744	0.999731	15739	1
NM_001170580	3	0.030994	0.076589	0.963153	1859	3	0.96901	0.96917	0.999731	22979	0
NM_152996	3	0.031019	0.076633	0.963153	1860	2	0.87677	0.87673	0.999731	20669	0
NM_138734	3	0.031028	0.076651	0.963153	1861	2	0.81162	0.81158	0.999731	19114	0
NM_001105581	3	0.031044	0.076687	0.963153	1862	2	0.59026	0.59567	0.999731	14053	1
NM_001037333	3	0.031052	0.076706	0.963153	1863	3	0.93534	0.93533	0.999731	22144	0
NM_177939	3	0.031095	0.076804	0.963153	1864	3	0.9689	0.96907	0.999731	22977	0
NM_001289808	3	0.031103	0.076821	0.963153	1865	3	0.95232	0.95244	0.999731	22534	0
NM_001142522	3	0.031108	0.076833	0.963153	1866	2	0.50221	0.52385	0.999731	12405	1
NM_015023	3	0.031116	0.076851	0.963153	1867	3	0.96888	0.96905	0.999731	22976	0
NM_032243	3	0.031132	0.076884	0.963153	1868	2	0.46609	0.49677	0.999731	11750	1
NM_182796	3	0.031145	0.076911	0.963153	1869	2	0.64917	0.64969	0.999731	15313	1
NM_178422	3	0.031148	0.076919	0.963153	1870	2	0.24543	0.35266	0.995378	8381	1
NM_005914	3	0.031163	0.076959	0.963153	1871	3	0.96884	0.969	0.999731	22974	0
NM_000555	3	0.031186	0.077015	0.963153	1872	3	0.96682	0.96696	0.999731	22901	0
NM_020310	3	0.031218	0.077087	0.963153	1873	3	0.96878	0.96895	0.999731	22973	0
NM_171999	3	0.031221	0.077095	0.963153	1874	2	0.28794	0.37814	0.995378	9003	1
NM_001274	3	0.031228	0.077111	0.963153	1875	2	0.3959	0.44733	0.99927	10622	1
NM_001430	3	0.031234	0.077123	0.963153	1876	3	0.96877	0.96893	0.999731	22972	0
NM_001031716	3	0.031243	0.077142	0.963153	1877	3	0.96876	0.96892	0.999731	22971	0
NM_017449	3	0.031245	0.077144	0.963153	1878	2	0.91763	0.9177	0.999731	21702	0
NM_001185	3	0.031253	0.07716	0.963153	1879	2	0.85978	0.85977	0.999731	20242	0
NM_001272086	3	0.031268	0.077196	0.963153	1880	3	0.96873	0.96889	0.999731	22969	0
NM_001099733	3	0.031286	0.077239	0.963153	1881	2	0.053945	0.1084	0.977105	2602	1
NM_018479	3	0.031294	0.077261	0.963153	1882	2	0.61881	0.62129	0.999731	14678	1
NM_145720	3	0.031312	0.077302	0.963153	1883	2	0.83397	0.83399	0.999731	19629	0
NM_001205206	3	0.031313	0.077304	0.963153	1884	3	0.96869	0.96885	0.999731	22967	0
NM_172387	3	0.031313	0.077304	0.963153	1885	3	0.96869	0.96885	0.999731	22968	0
NM_020133	3	0.031319	0.077317	0.963153	1886	3	0.96868	0.96885	0.999731	22966	0
NM_019045	3	0.031332	0.077343	0.963153	1887	3	0.96867	0.96883	0.999731	22965	0
NM_001243953	3	0.031349	0.077385	0.963153	1888	3	0.96865	0.96882	0.999731	22964	0
NM_052972	3	0.031367	0.077423	0.963153	1889	2	0.8609	0.86089	0.999731	20270	0
NM_001079840	3	0.031456	0.077638	0.963153	1890	2	0.7434	0.74341	0.999731	17537	0
NM_001013253	3	0.031459	0.077649	0.963153	1891	3	0.96854	0.96871	0.999731	22962	0
NM_001134758	3	0.031479	0.077696	0.963153	1892	3	0.93188	0.93188	0.999731	22048	0
NM_000833	3	0.031545	0.077849	0.963153	1893	2	0.88412	0.88397	0.999731	20860	0
NM_001195102	3	0.031562	0.077888	0.963153	1894	1	0.0035522	0.0097055	0.881042	258	2
NM_005063	3	0.03157	0.077908	0.963153	1895	3	0.96843	0.96859	0.999731	22960	0
NM_003950	3	0.031583	0.077938	0.963153	1896	3	0.96842	0.96858	0.999731	22959	0
NM_001171941	3	0.031604	0.077987	0.963153	1897	2	0.3563	0.42112	0.996661	10020	1
NM_033116	3	0.031617	0.078011	0.963153	1898	3	0.96838	0.96855	0.999731	22958	0
NM_001163735	3	0.031642	0.07807	0.963153	1899	3	0.95189	0.952	0.999731	22519	0
NM_024712	3	0.031646	0.078078	0.963153	1900	2	0.13504	0.22091	0.995378	5246	1
NM_001134363	3	0.031688	0.07817	0.963153	1901	3	0.94291	0.94287	0.999731	22325	0
NM_001100397	3	0.031728	0.078258	0.963153	1902	3	0.96827	0.96844	0.999731	22957	0
NM_032108	3	0.031729	0.078259	0.963153	1903	2	0.90181	0.90174	0.999731	21276	0
NM_001005275	3	0.031754	0.078311	0.963153	1904	3	0.96825	0.96841	0.999731	22956	0
NM_001169110	3	0.031756	0.078321	0.963153	1905	2	0.90181	0.90174	0.999731	21325	0
NM_002703	3	0.031762	0.078335	0.963153	1906	3	0.96824	0.9684	0.999731	22955	0
NM_145254	3	0.031771	0.078355	0.963153	1907	2	0.43244	0.4725	0.999731	11202	1
NM_003337	3	0.031781	0.078377	0.963153	1908	2	0.17197	0.27032	0.995378	6397	1
NM_005638	3	0.031813	0.078445	0.963153	1909	2	0.84453	0.84451	0.999731	19884	0
NM_001083620	3	0.031822	0.078465	0.963153	1910	3	0.96818	0.96834	0.999731	22954	0
NM_001172285	3	0.031844	0.07851	0.963153	1911	3	0.96816	0.96832	0.999731	22952	0
NM_001282162	3	0.031855	0.078533	0.963153	1912	1	0.2416	0.35043	0.995378	8322	1
NM_002874	3	0.031861	0.07855	0.963153	1913	3	0.96814	0.9683	0.999731	22951	0
NM_020807	3	0.031891	0.078616	0.963153	1914	3	0.96811	0.96827	0.999731	22950	0
NM_203474	3	0.031897	0.078628	0.963153	1915	3	0.92938	0.92944	0.999731	21993	0
NM_003034	3	0.031899	0.078636	0.963153	1916	3	0.9681	0.96826	0.999731	22949	0
NM_032876	3	0.031968	0.078798	0.963153	1917	3	0.96803	0.9682	0.999731	22948	0
NM_001013630	3	0.031976	0.078821	0.963153	1918	2	0.61757	0.62018	0.999731	14648	1
NM_001172501	3	0.03198	0.078829	0.963153	1919	3	0.95934	0.95953	0.999731	22712	0
NM_001001557	3	0.031985	0.078839	0.963153	1920	3	0.96801	0.96818	0.999731	22946	0
NM_174951	1	0.032	0.078865	0.963153	1921	1	0.968	0.96817	0.999731	22945	0
NM_023033	3	0.032022	0.078924	0.963153	1922	2	0.54768	0.55964	0.999731	13224	1
NM_001497	3	0.032025	0.078928	0.963153	1923	2	0.72871	0.72883	0.999731	17168	0
NM_052847	3	0.032054	0.07899	0.963153	1924	3	0.96795	0.96811	0.999731	22944	0
NM_022750	3	0.032064	0.079011	0.963153	1925	2	0.54582	0.55812	0.999731	13186	1
NM_014665	3	0.032084	0.07906	0.963153	1926	3	0.96792	0.96808	0.999731	22943	0
NM_000853	3	0.032099	0.079088	0.963153	1927	2	0.35948	0.42322	0.996661	10066	1
NM_014296	3	0.03214	0.079176	0.963153	1928	2	0.84767	0.84761	0.999731	19954	0
NM_001193268	3	0.032147	0.07919	0.963153	1929	3	0.95667	0.95685	0.999731	22641	0
NM_021249	3	0.032149	0.079195	0.963153	1930	3	0.96785	0.96801	0.999731	22941	0
NM_033127	3	0.032189	0.079277	0.963153	1931	1	0.28415	0.37583	0.995378	8949	1
NM_003080	3	0.032209	0.079335	0.963153	1932	3	0.96779	0.96795	0.999731	22940	0
NM_005949	3	0.032272	0.079486	0.963153	1933	2	0.69015	0.69031	0.999731	16268	0
NM_052960	3	0.032314	0.079585	0.963153	1934	2	0.51317	0.53225	0.999731	12597	1
NM_018451	3	0.032336	0.07964	0.963153	1935	2	0.55804	0.56817	0.999731	13415	1
NM_148976	3	0.032348	0.079657	0.963153	1936	3	0.96765	0.96782	0.999731	22938	0
NM_178161	3	0.032356	0.079672	0.963153	1937	1	0.069122	0.13001	0.977105	3154	1
NM_178831	3	0.032363	0.079691	0.963153	1938	3	0.96764	0.96781	0.999731	22937	0
NM_001281725	3	0.032363	0.079691	0.963153	1939	3	0.96764	0.96781	0.999731	22936	0
NM_002600	3	0.032413	0.0798	0.963153	1940	3	0.96759	0.96775	0.999731	22935	0
NM_001282351	3	0.032427	0.079834	0.963153	1941	2	0.70162	0.70177	0.999731	16514	0
NM_017854	3	0.032439	0.079862	0.963153	1942	2	0.26117	0.36195	0.995378	8607	1
NM_006869	3	0.032456	0.079898	0.963153	1943	3	0.96754	0.96771	0.999731	22933	0
NM_001928	3	0.032476	0.079942	0.963153	1944	2	0.89505	0.89492	0.999731	21111	0
NM_014982	3	0.032481	0.079951	0.963153	1945	1	0.20563	0.31449	0.995378	7471	2
NM_002339	3	0.032495	0.079989	0.963153	1946	3	0.9675	0.96767	0.999731	22932	0
NM_153437	3	0.032509	0.080014	0.963153	1947	2	0.74213	0.74215	0.999731	17508	0
NM_001164538	3	0.032517	0.080031	0.963153	1948	3	0.96748	0.96765	0.999731	22931	0
NM_001164586	3	0.032523	0.080043	0.963153	1949	1	0.71721	0.71741	0.999731	16886	0
NM_014578	3	0.032543	0.080091	0.963153	1950	3	0.96746	0.96762	0.999731	22930	0
NM_001271682	3	0.03255	0.080108	0.963153	1951	2	0.76744	0.76741	0.999731	18066	0
NM_001136558	3	0.032567	0.080144	0.963153	1952	2	0.39971	0.44987	0.999731	10674	1
NM_032236	3	0.032569	0.080152	0.963153	1953	3	0.96743	0.96759	0.999731	22928	0
NM_021931	3	0.032583	0.080181	0.963153	1954	2	0.86935	0.86939	0.999731	20485	0
NM_001206946	3	0.032606	0.08023	0.963153	1955	1	0.45081	0.48554	0.999731	11508	1
NM_001039538	3	0.032619	0.080257	0.963153	1956	3	0.96738	0.96754	0.999731	22926	0
NM_001256126	3	0.032635	0.080293	0.963153	1957	3	0.96737	0.96752	0.999731	22925	0
NM_022804	3	0.032648	0.080318	0.963153	1958	2	0.76227	0.76213	0.999731	17943	0
NM_001177664	3	0.032652	0.08033	0.963153	1959	3	0.96735	0.9675	0.999731	22924	0
NM_001136499	3	0.032661	0.080347	0.963153	1960	3	0.96734	0.9675	0.999731	22923	0
NM_194250	3	0.032687	0.080417	0.963153	1961	3	0.96731	0.96747	0.999731	22922	0
NM_014755	3	0.032694	0.080429	0.963153	1962	3	0.96731	0.96746	0.999731	22921	0
NM_138464	3	0.032711	0.080469	0.963153	1963	3	0.96729	0.96744	0.999731	22920	0
NM_031216	3	0.032722	0.08049	0.963153	1964	3	0.96728	0.96743	0.999731	22919	0
NM_001204818	3	0.032735	0.080528	0.963153	1965	3	0.96726	0.96741	0.999731	22918	0
NM_198573	3	0.032761	0.080587	0.963153	1966	3	0.96724	0.96738	0.999731	22917	0
NM_006265	3	0.032773	0.080613	0.963153	1967	2	0.75204	0.75193	0.999731	17713	0
NM_001033045	3	0.032779	0.080624	0.963153	1968	3	0.96722	0.96736	0.999731	22916	0
NM_032420	3	0.032814	0.080702	0.963153	1969	3	0.96007	0.96026	0.999731	22732	0
NM_003239	3	0.032825	0.080723	0.963153	1970	3	0.96718	0.96732	0.999731	22915	0
NM_004847	2	0.032856	0.080792	0.963153	1971	1	0.74279	0.74281	0.999731	17523	0
NM_194284	3	0.032857	0.080793	0.963153	1972	3	0.96714	0.96729	0.999731	22913	0
NM_003011	3	0.032857	0.080793	0.963153	1973	3	0.96714	0.96729	0.999731	22914	0
NM_133642	3	0.032879	0.08085	0.963153	1974	3	0.96712	0.96727	0.999731	22912	0
NM_001127621	3	0.032925	0.080947	0.963153	1975	3	0.96707	0.96722	0.999731	22911	0
NM_001007261	3	0.03294	0.080981	0.963153	1976	2	0.096754	0.16876	0.990198	4041	1
NM_001243137	3	0.032963	0.081031	0.963153	1977	2	0.91001	0.91	0.999731	21527	0
NM_213620	3	0.032971	0.08105	0.963153	1978	2	0.6131	0.61611	0.999731	14546	1
NM_001039891	3	0.032976	0.081061	0.963153	1979	3	0.96702	0.96716	0.999731	22910	0
NM_001511	3	0.032982	0.081074	0.963153	1980	1	0.51254	0.53172	0.999731	12586	1
NM_080747	3	0.033004	0.081128	0.963153	1981	2	0.90485	0.90482	0.999731	21394	0
NM_005510	3	0.033007	0.081129	0.963153	1982	3	0.96699	0.96714	0.999731	22909	0
NM_001004750	3	0.033024	0.081168	0.963153	1983	1	0.87442	0.87443	0.999731	20608	0
NM_018128	3	0.033065	0.081263	0.963153	1984	2	0.68921	0.68937	0.999731	16248	0
NM_001136472	3	0.033081	0.081289	0.963153	1985	3	0.96692	0.96706	0.999731	22908	0
NM_030912	3	0.033107	0.08135	0.963153	1986	2	0.12964	0.2136	0.995378	5064	1
NM_015963	3	0.033112	0.081364	0.963153	1987	2	0.9111	0.91111	0.999731	21552	0
NM_018031	3	0.033116	0.081375	0.963153	1988	3	0.96688	0.96702	0.999731	22906	0
NM_001077594	3	0.033125	0.081403	0.963153	1989	3	0.96687	0.96701	0.999731	22905	0
NM_145253	3	0.033129	0.081409	0.963153	1990	2	0.36255	0.4252	0.996661	10119	1
NM_182495	3	0.033138	0.08143	0.963153	1991	3	0.96686	0.967	0.999731	22904	0
NM_001267783	3	0.033147	0.081449	0.963153	1992	3	0.96685	0.96699	0.999731	22903	0
NM_001267048	3	0.033165	0.08149	0.963153	1993	3	0.96684	0.96698	0.999731	22902	0
NM_001080395	3	0.03317	0.081507	0.963153	1994	2	0.34867	0.41619	0.996661	9904	1
NM_130851	3	0.033183	0.081536	0.963153	1995	3	0.96682	0.96696	0.999731	22900	0
NM_001039178	3	0.033187	0.081543	0.963153	1996	2	0.69443	0.6946	0.999731	16366	0
NM_153035	3	0.033191	0.081548	0.963153	1997	3	0.96681	0.96695	0.999731	22899	0
NM_004121	3	0.033209	0.081587	0.963153	1998	3	0.96679	0.96693	0.999731	22898	0
NM_001174069	3	0.033274	0.08174	0.963153	1999	2	0.58832	0.59398	0.999731	14004	1
[truncated: 21,729 more rows]
